# Supplementary material
Source: publisher figshare collection journal article supplement (https://acs.figshare.com/ndownloader/files/4363657)

# Enantioselective Total Syntheses of (–)-Taiwaniaquinone H and (–)-Taiwaniaquinol B by Iridium-Catalyzed Borylation and Palladium-Catalyzed Asymmetric $\alpha$ -Arylation

Xuebin Liao, Levi M. Stanley, and John F. Hartwig\*

*Department of Chemistry, University of Illinois, 600 South Mathews Avenue,  
Urbana, Illinois 61801*

## Supporting Information

### Table of Contents

|                                                                                                                                                                                                                                     |      |
|-------------------------------------------------------------------------------------------------------------------------------------------------------------------------------------------------------------------------------------|------|
| General Experimental Details                                                                                                                                                                                                        | S-2  |
| Materials                                                                                                                                                                                                                           | S-2  |
| 2-Isopropyl-1,3-dimethoxybenzene ( <b>13</b> )                                                                                                                                                                                      | S-3  |
| 5-Bromo-2-isopropyl-1,3-dimethoxybenzene ( <b>12</b> )                                                                                                                                                                              | S-3  |
| ( <i>E</i> )-2-Methyl-6-((methyl(phenyl)amino)methylene)cyclohexanone ( <b>11</b> )                                                                                                                                                 | S-4  |
| ( <i>R,E</i> )-2-(4-Isopropyl-3,5-dimethoxyphenyl)-2-methyl-6-((methyl(phenyl)amino)-methylene)-cyclohexanone ( <b>14</b> )                                                                                                         | S-4  |
| ( <i>R</i> )-2-(4-Isopropyl-3,5-dimethoxyphenyl)-2-methylcyclohexanone ( <b>15</b> )                                                                                                                                                | S-5  |
| (2 <i>R</i> ,6 <i>S</i> )-6-Iodo-2-(2-iodo-4-isopropyl-3,5-dimethoxyphenyl)-2-methylcyclohexanone ( <b>16</b> )                                                                                                                     | S-6  |
| Figure S1                                                                                                                                                                                                                           | S-6  |
| ( <i>R</i> )-2-(4-Isopropyl-3,5-dimethoxyphenyl)-2,6,6-trimethylcyclohexanone ( <b>10</b> )                                                                                                                                         | S-7  |
| (4 <i>R</i> )-4-(4-Isopropyl-3,5-dimethoxyphenyl)-4,8,8-trimethyl-1-oxaspiro[2.5]octane ( <b>9</b> )                                                                                                                                | S-7  |
| Table S1                                                                                                                                                                                                                            | S-8  |
| BiCl <sub>3</sub> -Promoted Synthesis of ( <i>R</i> )-7-isopropyl-6,8-dimethoxy-1,1,4a-trimethyl-2,3,4,4a-tetrahydro-1 <i>H</i> -fluorene ( <b>8</b> )                                                                              | S-9  |
| BF <sub>3</sub> ·OEt <sub>2</sub> -Promoted Synthesis of ( <i>R</i> )-7-isopropyl-6,8-dimethoxy-1,1,4a-trimethyl-2,3,4,4a-tetrahydro-1 <i>H</i> -fluorene ( <b>8</b> )                                                              | S-9  |
| (–)-Taiwaniaquinone H ( <b>2</b> )                                                                                                                                                                                                  | S-10 |
| (4 <i>aS</i> ,9 <i>aR</i> )-7-isopropyl-6,8-dimethoxy-1,1,4a-trimethyl-2,3,4,4a-tetrahydro-1 <i>H</i> -fluoren-9(9 <i>aH</i> )-one ( <b>17</b> )                                                                                    | S-10 |
| (–)-Taiwaniaquinonol B ( <b>7</b> )                                                                                                                                                                                                 | S-11 |
| References                                                                                                                                                                                                                          | S-12 |
| <sup>1</sup> H NMR Spectra and <sup>13</sup> C NMR Spectra for Compounds <b>12</b> , <b>14</b> , <b>15</b> , <b>16</b> , <b>10</b> , <b>9</b> , <b>8</b> , <b>2</b> , <b>17</b> , and <b>7</b> ; HPLC Traces for Compound <b>14</b> | S-13 |

## General Experimental Details

All air-sensitive manipulations were conducted under an inert atmosphere in a nitrogen-filled glovebox or by standard Schlenk techniques. All reactions were performed under an atmosphere of nitrogen unless otherwise stated. All glassware for moisture-sensitive reactions was dried at 140 °C in an oven. Flash column chromatography was performed on Silicycle Siala-P silica gel. Products were visualized on TLC plates by UV or by staining with KMnO<sub>4</sub> or ceric ammonium molybdate. Melting points were measured on a Thomas Hoover Unimelt capillary melting point apparatus and are uncorrected. Elemental analyses were performed by the University of Illinois at Urbana-Champaign Microanalysis Laboratory or by Robertson Microlit Laboratories, Inc. (Madison, NJ). High-resolution MS analyses were performed by the University of Illinois at Urbana-Champaign Mass Spectrometry Center. GC/MS analyses were obtained on an Agilent 6890 gas chromatograph equipped with an Agilent 5973 mass selective detector. HPLC analyses were carried out on a Waters chromatography system (1525 binary pump, 717+ autosampler, 2487 dual wavelength detector). Optical rotations were measured on a Rudolph Instruments (Denville, NJ) Autopol IV polarimeter. <sup>1</sup>H NMR spectra were acquired at 500 MHz and <sup>13</sup>C NMR spectra were acquired at 125 MHz on Varian Unity and Varian Inova instruments in the University of Illinois VOICE NMR facility. Chemical shifts are reported in ppm relative to a residual solvent peak (CDCl<sub>3</sub> = 7.26 ppm for <sup>1</sup>H and 77.23 ppm for <sup>13</sup>C). Coupling constants are reported in hertz.

## Materials

Tetrahydrofuran, diethyl ether, toluene, benzene, and dichloromethane were degassed by purging with argon for 45 minutes and dried with a solvent purification containing a one-meter column of activated alumina. 1,3-dimethoxybenzene, *N,N,N',N'*-tetramethylethylenediamine (TMEDA, ≥99.5%), *n*-butyllithium (1.6 M in hexanes), trifluoroacetic acid, triethylsilane, 4,4'-di-*tert*-butyl-2,2'-bipyridine (*t*-Bu-bipy), copper(II) bromide, ethyl formate, 2-methylcyclohexanone, *N*-methylaniline, iodomethane, sodium hydride, trimethylsulfonium iodide, dimethyl sulfoxide (anhydrous), BF<sub>3</sub>·OEt<sub>2</sub> (purified by redistillation), BBr<sub>3</sub>·SMe<sub>2</sub> (1 M in CH<sub>2</sub>Cl<sub>2</sub>), 1,2-dichloroethane, salcomine, *N,N*-dimethylformamide (anhydrous), BH<sub>3</sub>·THF (1 M in THF), 30% w/w H<sub>2</sub>O<sub>2</sub>, BCl<sub>3</sub> (1M in hexanes), ceric ammonium nitrate, and sodium hydrosulfite (technical grade) were purchased from Sigma-Aldrich and used without further purification. Acetone (Optima®), methanol (Optima®), and acetonitrile (Optima®) were purchased from Fisher Scientific and used without further purification. Potassium *t*-butoxide (KO*t*-Bu), sodium *t*-butoxide (NaO*t*-Bu), sodium hexamethyldisilazane (NaHMDS), In(OTf)<sub>3</sub>, InCl<sub>3</sub>, Bi(OTf)<sub>3</sub>, and BiCl<sub>3</sub>, (*R*)-Difluorophos, and Pd(dba)<sub>2</sub> were purchased from Strem and used without further purification. [Ir(COD)(OMe)]<sub>2</sub> was received as a gift from Johnson-Matthey and used without further purification. Bis(pinacolato)diboron (B<sub>2</sub>pin<sub>2</sub>) was received as a gift from Allychem and used without further purification. Methylaluminum bis(4-bromo-2,6-di-*tert*-butylphenoxide) (MABR)<sup>1</sup> and IBX<sup>2</sup> were prepared according to a known procedures.

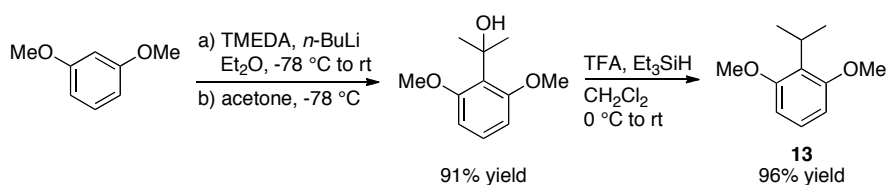

**2-Isopropyl-1,3-dimethoxybenzene (13):**<sup>3</sup> To a solution of 1,3-dimethoxybenzene (10.0 mL, 77.2 mmol) and TMEDA (13.0 mL, 86.7 mmol) in diethyl ether (250 mL) at -78 °C was added *n*-BuLi as a 1.6 M solution in hexanes (51.0 mL, 81.6 mmol) over 15 min. The reaction mixture was stirred at -78 °C for 30 minutes, then allowed to warm to room temperature over 1 h. The reaction mixture was stirred at room temperature for an additional 2 h, then cooled to -78 °C. Acetone (7.0 mL, 95 mmol) was added to the reaction mixture. The resulting solution was stirred at -78 °C for 30 min, then quenched with saturated aqueous ammonium chloride. The organic layer was separated, washed with saturated aqueous ammonium chloride, dried over MgSO<sub>4</sub>, and concentrated. The crude product was purified by flash column silica gel chromatography (90:10 to 80:20 hexanes:EtOAc) to yield 2-(2,6-dimethoxyphenyl)propan-2-ol as a colorless oil in 91% yield (13.8 g, 70.5 mmol). <sup>1</sup>H NMR (CDCl<sub>3</sub>, 500 MHz) δ 1.64 (s, 6H), 3.82 (s, 6H), 5.74 (s, 1H), 6.59 (d, *J* = 8.5 Hz, 2H), 7.14 (t, *J* = 8.5 Hz, 1H). <sup>13</sup>C NMR (CDCl<sub>3</sub>, 125 MHz) δ 31.1, 56.2, 74.2, 106.1, 124.4, 127.7, 157.9. IR (NaCl) 3522 (br), 3048, 3006, 2973, 2944, 2841, 1594, 1582, 1475, 1435, 1388, 1368, 1248, 1101, 949. To a solution of 2-(2,6-dimethoxyphenyl)propan-2-ol (10.0 g, 51.0 mmol) in CH<sub>2</sub>Cl<sub>2</sub> (500 mL) at 0 °C was added trifluoroacetic acid (18.1 mL, 243 mmol) and triethylsilane (23.1 mL, 145 mmol). The reaction mixture was stirred at 0 °C for 1 h, then removed from the ice-water bath and stirred for an additional 1 h. The reaction was concentrated under reduced pressure. The crude product was purified by flash column silica gel chromatography (95:5 hexanes:EtOAc) to give **13** as a colorless oil in 96% yield (8.80 g, 48.8 mmol). <sup>1</sup>H NMR (CDCl<sub>3</sub>, 500 MHz) δ 1.32 (d, *J* = 7.0 Hz, 6H), 3.64 (septet, *J* = 7.0 Hz, 1H), 3.83 (s, 6H), 6.57 (d, *J* = 8.5 Hz, 2H), 7.13 (t, *J* = 8.6 Hz, 1H). <sup>13</sup>C NMR (CDCl<sub>3</sub>, 125 MHz) δ 20.9, 24.3, 55.9, 104.7, 124.6, 126.7, 158.8. IR (NaCl) 2986, 2959, 2940, 2873, 2839, 1593, 1474, 1438, 1360, 1249, 1142, 1113, 1088, 1054.

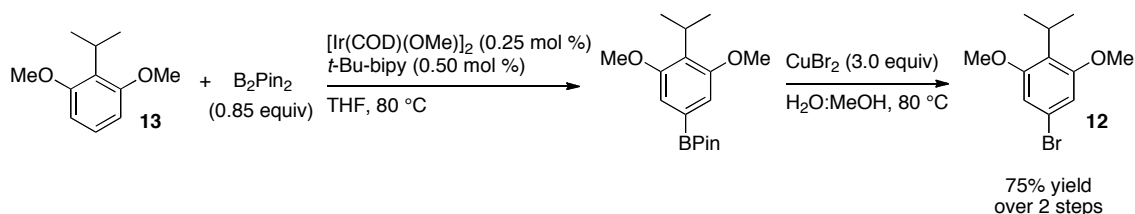

**5-Bromo-2-isopropyl-1,3-dimethoxybenzene (12):** In a nitrogen-filled glovebox, [Ir(COD)(OMe)]<sub>2</sub> (0.0341 g, 0.0514 mmol), 4,4'-di-*tert*-butyl-2,2'-bipyridine (0.0290 g, 0.108 mmol), B<sub>2</sub>Pin<sub>2</sub> (4.32 g, 17.0 mmol), and THF (25 mL) were added to a 500-mL reaction vessel equipped with a vacuum valve. Arene **13** (3.60 g, 20.0 mmol) was added to the resulting reaction mixture, and the reaction vessel was sealed with a PTFE stopper. The reaction mixture was removed from the glovebox and heated at 80 °C for 40 h. The reaction mixture was then cooled to room temperature, and the solvent was removed under vacuum. The crude arylboronate ester was dried under vacuum for 2 h. The crude arylboronate ester was dissolved in MeOH (150 mL). To the methanolic solution of the arylboronate ester was added copper(II) bromide (13.4 g, 60.0 mmol) as a solution in distilled water (150 mL). The reaction vessel was

sealed with a PTFE stopper and heated at 80 °C for 48 h. The reaction mixture was then cooled to room temperature and extracted with EtOAc (3x). The combined organic layers were washed with brine, dried over MgSO<sub>4</sub>, filtered, and concentrated under reduced pressure. The crude product was purified by flash column silica gel chromatography (99:1 hexanes:EtOAc) to give aryl bromide **12** (3.91 g, 15.1 mmol) as a white amorphous solid in 75% yield. <sup>1</sup>H NMR (CDCl<sub>3</sub>, 500 MHz) δ 1.25 (d, *J* = 7.0 Hz, 6H), 3.54 (septet, *J* = 7.0 Hz, 1H), 3.79 (s, 6H), 6.68 (s, 2H). <sup>13</sup>C NMR (CDCl<sub>3</sub>, 125 MHz) δ 20.6, 24.1, 56.0, 108.3, 119.6, 123.5, 159.2. IR (NaCl) 3004, 2988, 2961, 2941, 2873, 2838, 1580, 1463, 1450, 1407, 1360, 1228, 1145, 1125, 1101, 1056. Anal. Calcd. for C<sub>11</sub>H<sub>15</sub>BrO: C, 50.98; H, 5.83; found: C, 50.82; H, 5.87.

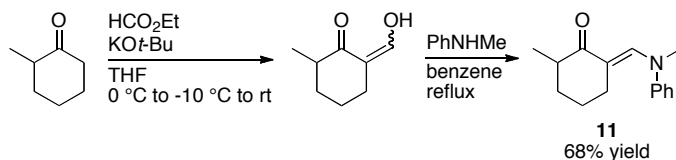

**(*E*)-2-Methyl-6-((methyl(phenyl)amino)methylene)cyclohexanone (**11**):**<sup>4</sup> To a stirred solution of KO<sup>*t*</sup>-Bu (3.70 g, 33.0 mmol) in THF (25 mL) at 0 °C was added ethyl formate (10 mL) dropwise. The resulting mixture was stirred at 0 °C until the evolution of gas had ceased. The mixture was then cooled to -10 °C and 2-methylcyclohexanone (3.64 mL, 33.0 mmol) in ethyl formate (20 mL) was added over 15 min. The reaction mixture was stirred at -10 °C for 30 min, then warmed to room temperature and stirred for 12 h. The mixture was acidified to pH = 1 with 1M HCl and extracted with Et<sub>2</sub>O (3x). The combined organic layers were dried over MgSO<sub>4</sub>, filtered, and concentrated under reduced pressure to yield crude hydroxymethylene ketone that was used without further purification. The crude ketone was dissolved in benzene (60 mL), and *N*-methylaniline (4.20 mL, 39.0 mmol) was added. The reaction flask was equipped with a Dean-Stark trap and a condenser, and the reaction mixture was refluxed for 4 h. The reaction mixture was cooled to room temperature and concentrated under reduced pressure. The crude product was partially purified by flash column silica gel chromatography (80:20 hexanes:EtOAc) to give **11** as a pink-red solid. Recrystallization from hexane provided analytically pure **11** as off-white crystals in 68% yield (4.66 g, 20.3 mmol). m.p. = 51-52 °C (lit. values, 50-51 °C<sup>4a</sup> and 51-52.5 °C<sup>4b</sup>). <sup>1</sup>H NMR (CDCl<sub>3</sub>, 500 MHz) δ 1.17 (d, *J* = 7.0 Hz, 3H), 1.41-1.55 (m, 2H), 1.67-1.76 (m, 1H), 1.86-1.97 (m, 1H), 2.02-2.16 (m, 2H), 2.29-2.38 (m, 1H), 3.39 (s, 3H), 7.01 (dd, *J* = 8.5, 1.0 Hz, 2H), 7.07 (t, *J* = 8.0, 1.0 Hz, 1H), 7.28 (ddd, *J* = 8.5, 8.0, 1.0 Hz, 2H), 7.50 (t, *J* = 1.5 Hz, 1H). <sup>13</sup>C NMR (CDCl<sub>3</sub>, 125 MHz) δ 17.8, 22.5, 28.1, 31.6, 42.3, 42.7, 112.7, 121.1, 123.8, 129.0, 144.8, 146.3, 202.5. IR (NaCl) 3049, 2980, 2958, 2934, 2862, 1651, 1601, 1542 (br), 1494, 1455, 1425, 1370, 1319, 1294, 1237, 1193, 1107.

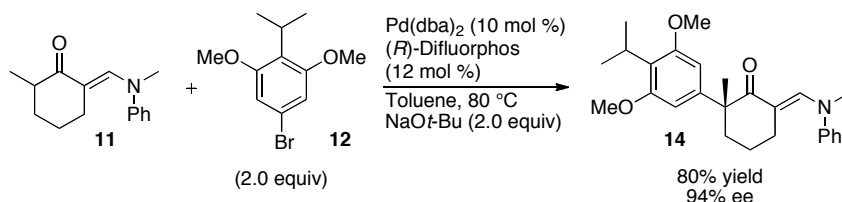

**(*R,E*)-2-(4-Isopropyl-3,5-dimethoxyphenyl)-2-methyl-6-((methyl(phenyl)amino)methylene)cyclohexanone (**14**):** In a nitrogen-filled glovebox to a 100-mL reaction vessel equipped with a

vacuum valve were added (*R*)-Difluorophos (0.164 g, 0.240) Pd(dba)<sub>2</sub> (0.115 g, 0.200 mmol), ketone **11** (0.458 g, 0.200 mmol), and toluene (40 mL). To the resulting mixture was added aryl bromide **12**, followed by NaOt-Bu (0.384 g, 4.00 mmol). The reaction vessel was sealed with a PTFE stopper and removed from the glovebox. The reaction mixture was stirred at 80 °C for 72 h. The reaction mixture was then cooled to room temperature and quenched with cold water. The product was extracted from the resulting mixture with EtOAc (3x). The combined organic layers were washed with brine, dried over MgSO<sub>4</sub>, filtered, and concentrated under reduced pressure. The crude product was purified by flash column silica gel chromatography (80:20 hexanes:EtOAc) to give α-aryl ketone **14** (0.650 g, 1.60 mmol) as a yellow foam in 80% yield. The enantiomeric excess was determined by HPLC analysis (220 nm, 25 °C) t<sub>R</sub> 6.2 min ((*S*)-enantiomer); t<sub>R</sub> 16.6 min ((*R*)-enantiomer) [Chiralcel OD-H (0.46 cm x 25 cm)(from Daicel Chemical Ind., Ltd.) hexanes/*i*-PrOH, 90:10, 1.0 mL/min] to be 94%. [α]<sub>D</sub><sup>25</sup> = +179.1 (c 0.90, CHCl<sub>3</sub>, 94% ee). <sup>1</sup>H NMR (CDCl<sub>3</sub>, 500 MHz) δ 1.258 (d, *J* = 7.0 Hz, 3H), 1.259 (d, *J* = 7.0 Hz, 3H), 1.47 (s, 3H), 1.53 (m, 2H), 1.80-1.87 (m, 1H), 2.01-2.16 (m, 2H), 2.25-2.31 (m, 1H), 3.49 (s, 3H), 3.53 (septet, *J* = 7.0 Hz, 1H), 3.78 (s, 6H), 6.48 (s, 2H), 7.02 (d, *J* = 8.0 Hz, 2H), 7.08 (t, *J* = 7.5 Hz, 1H), 7.29-7.34 (m, 2H), 7.57 (s, 1H). <sup>13</sup>C NMR (CDCl<sub>3</sub>, 125 MHz) δ 19.9, 21.12, 21.14, 24.3, 27.5, 28.3, 37.5, 42.4, 51.5, 56.2, 104.1, 113.7, 121.3, 123.0, 124.0, 129.2, 144.8, 145.5, 146.6, 158.7, 202.8. IR (NaCl) 2984, 2960, 2938, 2872, 2838, 1649, 1603, 1573, 1542 (br), 1495, 1414, 1298, 1185, 1139, 1112, 1055. HRMS (ESI) calcd. for C<sub>26</sub>H<sub>34</sub>NO<sub>3</sub><sup>+</sup> [M+H]<sup>+</sup>: 408.2539; found 408.2545.

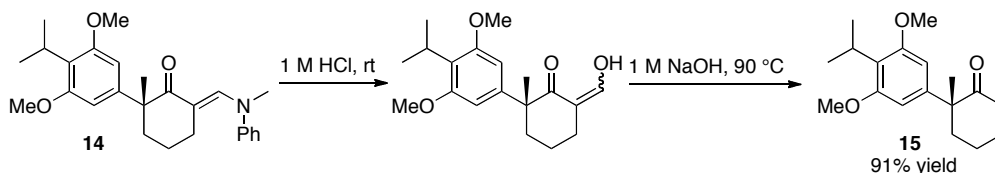

**(*R*)-2-(4-Isopropyl-3,5-dimethoxyphenyl)-2-methylcyclohexanone (15):** α-Aryl ketone **14** (0.650 g, 1.60 mmol) was dissolved in THF (50 mL). Aqueous 1 M HCl was added to the solution of **14**, and the resulting mixture was stirred at room temperature for 3 h. The reaction mixture was extracted with Et<sub>2</sub>O (3x), and the combined organic layers were concentrated under reduced pressure. To the crude hydroxymethylene ketone was added aqueous 1 M NaOH (50 mL) and the reaction flask was equipped with a reflux condenser. The reaction mixture was heated at 90 °C. After 6 h, the reaction mixture was cooled to room temperature and neutralized with aqueous 1 M HCl. The reaction mixture was extracted with EtOAc (3x). The combined organic layers were washed with brine, dried over MgSO<sub>4</sub>, and concentrated under reduced pressure. The crude product was purified by flash column silica gel chromatography (98:2 hexanes:Et<sub>2</sub>O) to give the deprotected ketone **15** (0.423 g, 1.46 mmol) as a white amorphous solid in 91% yield. [α]<sub>D</sub><sup>24</sup> = +159.6 (c 0.50, CHCl<sub>3</sub>, 94% ee). <sup>1</sup>H NMR (CDCl<sub>3</sub>, 500 MHz) δ 1.25 (d, *J* = 7.0 Hz, 6H), 1.27 (s, 3H), 1.63-1.73 (m, 3H), 1.80-1.90 (m, 1H), 1.93-2.00 (m, 1H), 2.26-2.31 (m, 1H), 2.43 (ddd, *J* = 13.5, 13.5, 6.5 Hz, 1H), 2.62 (m, 1H), 3.53 (septet, 7.0 Hz, 1H), 3.76 (s, 6H), 6.32 (s, 2H). <sup>13</sup>C NMR (CDCl<sub>3</sub>, 125 MHz) δ 20.9 (2C, CHCH<sub>3</sub>), 22.1, 24.2, 28.4, 28.6, 38.4, 40.1, 54.5, 56.1, 102.8, 123.1, 141.8, 159.1, 214.4. IR (NaCl) 2960, 2940, 2869, 2839, 1704, 1603, 1575, 1464, 1451, 1414, 1360, 1310, 1136, 1101, 1056. Anal. Calcd. for C<sub>18</sub>H<sub>26</sub>O<sub>3</sub>: C, 74.45; H, 9.02; found: C, 74.22; H, 9.33.

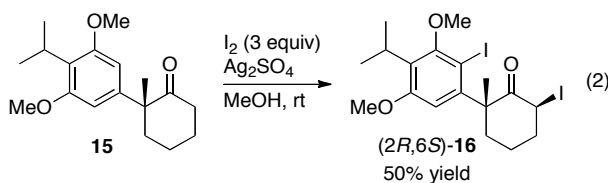

**(2*R*,6*S*)-6-Iodo-2-(2-iodo-4-isopropyl-3,5-dimethoxyphenyl)-2-methylcyclohexanone (16):**

To a solution of ketone **15** (0.0415 g, 0.143 mmol, 94% ee) in MeOH (5 mL) was added iodine (0.109 g, 0.429 mmol) and silver sulfate (0.133 g, 0.428 mmol). The resulting mixture was stirred at room temperature for 3 h. The reaction was quenched with saturated aqueous sodium thiosulfate. The resulting mixture was extracted with Et<sub>2</sub>O (3x). The combined organic layers were washed with brine, dried over Na<sub>2</sub>SO<sub>4</sub>, filtered, and concentrated under reduced pressure. The crude product was purified by flash column silica gel chromatography (98:2 hexanes:Et<sub>2</sub>O) to give compound **16** as an amorphous solid. The resulting solid was dissolved in a minimal volume of hexane and the solution was stored in a freezer at -30 °C. After standing overnight at -30 °C, the mixture was filtered cold and washed with cold hexane (-30 °C) to provide crystals of **16** (0.0388 g, 0.0715 mmol, 50% yield) that were suitable for single-crystal X-ray diffraction. m.p. = 117-119 °C.  $[\alpha]_D^{23} = +80.0$  (c 0.11, CHCl<sub>3</sub>). <sup>1</sup>H NMR (CDCl<sub>3</sub>, 500 MHz)  $\delta$  1.32 (d, *J* = 7.0 Hz, 3H), 1.33 (d, *J* = 7.0 Hz, 3H), 1.62 (s, 3H), 1.70-1.80 (m, 2H), 1.90-2.01 (m, 1H), 2.20-2.32 (m, 1H), 2.59-2.80 (m, 2H), 3.46 (septet, *J* = 7.0 Hz, 1H), 3.71 (s, 3H), 3.84 (s, 3H), 4.91 (dd, *J* = 11.0, 5.0 Hz, 1H), 6.74 (s, 1H). <sup>13</sup>C NMR (CDCl<sub>3</sub>, 125 MHz)  $\delta$  21.00, 21.02, 23.3, 27.3, 27.5, 34.6, 41.7, 42.8, 55.7, 59.9, 61.9, 88.5, 108.5, 129.6, 144.8, 158.3, 160.5, 207.7. IR (NaCl) 3047, 2958, 2935, 2873, 2844, 1718, 1698, 1583, 1549, 1457, 1376, 1336, 1304, 1138, 1087, 1055, 1022.

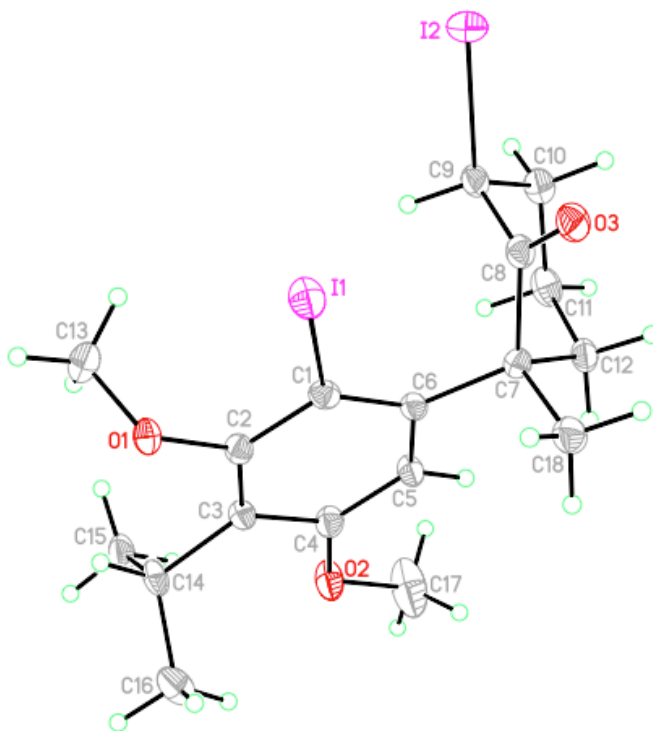

**Figure S1.** Ortep diagram of (2*R*,6*S*)-6-Iodo-2-(2-iodo-4-isopropyl-3,5-dimethoxyphenyl)-2-methylcyclohexanone **16**.

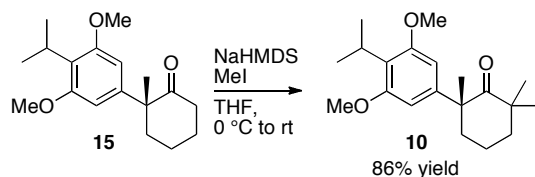

**(*R*)-2-(4-Isopropyl-3,5-dimethoxyphenyl)-2,6,6-trimethylcyclohexanone (10):** To a solution of NaHMDS (1.17 g, 6.38 mmol) in THF (10 mL) at 0 °C was added compound **15** (0.500 g, 1.72 mmol) as a solution in THF (5 mL). The resulting solution was stirred at 0 °C for 30 min. After 30 min the reaction mixture was allowed to warm to room temperature. The reaction was stirred an additional 1 h at room temperature. The reaction was quenched with cold water and extracted with Et<sub>2</sub>O (3x). The combined organic layers were washed with brine, dried over MgSO<sub>4</sub>, filtered and concentrated to give an approximately 80:20 mixture of dimethylated:monomethylated products. The crude mixture of products was added as a solution in THF (5 mL) to a solution of NaHMDS (0.630 g, 3.44 mmol) in THF (10 mL) at 0 °C. The resulting solution was stirred at 0 °C for 30 min. After 30 min, the reaction mixture was allowed to warm to room temperature. The reaction was stirred an additional 1 h at room temperature. The reaction was quenched with cold water and extracted with Et<sub>2</sub>O (3x). The combined organic layers were washed with brine, dried over MgSO<sub>4</sub>, filtered and concentrated. Analysis by GC-MS showed complete conversion to the dimethylated product **10**. The crude product was purified by flash column silica gel chromatography (98:2 hexanes:Et<sub>2</sub>O) to give compound **10** (0.470 g, 1.48 mmol) as a white amorphous solid in 86% yield.  $[\alpha]_D^{25} = +139.6$  (c 0.58, CHCl<sub>3</sub>, 94% ee). <sup>1</sup>H NMR (CDCl<sub>3</sub>, 500 MHz)  $\delta$  0.72 (s, 3H), 1.08 (s, 3H), 1.24 (d, *J* = 7.0 Hz, 3H), 1.25 (d, *J* = 7.0 Hz, 3H), 1.28 (s, 3H), 1.55-1.75 (m, 4H), 1.97-2.07 (m, 1H), 2.57-2.64 (m, 1H), 3.52 (septet, *J* = 7.0 Hz, 1H), 3.76 (s, 6H), 6.42 (s, 2H). <sup>13</sup>C NMR (CDCl<sub>3</sub>, 125 MHz)  $\delta$  18.4, 21.0 (2C, CHCH<sub>3</sub>), 24.1, 27.4, 27.8, 30.6, 36.2, 40.3, 45.8, 52.6, 56.1, 102.6, 123.0, 141.4, 158.8, 217.5. IR (NaCl) 2986, 2960, 2939, 2870, 2838, 1693, 1604, 1574, 1465, 1454, 1413, 1136, 1103, 1056. Anal. Calcd. for C<sub>20</sub>H<sub>30</sub>O<sub>3</sub>: C, 75.43; H, 9.50; found: C, 75.66; H, 9.29.

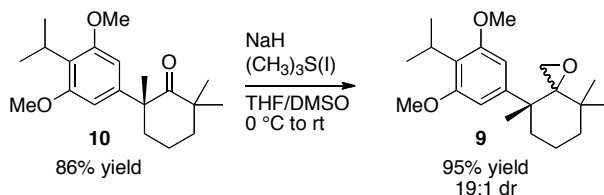

**(4*R*)-4-(4-Isopropyl-3,5-dimethoxyphenyl)-4,8,8-trimethyl-1-oxaspiro[2.5]octane (9):** A suspension of NaH (0.248 g, 10.3 mmol) in THF (25 mL) and DMSO (23 mL) was stirred at room temperature for 20 min. The mixture was cooled to 0 °C, and a solution of trimethylsulfonium iodide (0.714 g, 3.50 mmol) in DMSO (10 mL) was added to the reaction flask. The reaction mixture was stirred at 0 °C for 10 min. Compound **10** (0.500 g, 1.57 mmol) in THF (13 mL) was added to the reaction mixture. The reaction mixture was stirred at 0 °C for 30 min. The reaction flask was removed from the cold bath and allowed to warm to room temperature. The reaction mixture was stirred at room temperature for 12 h. The reaction was quenched with cold water and extracted with EtOAc (3x). The combined organic layers were washed with brine, dried over MgSO<sub>4</sub>, filtered, and concentrated under reduced pressure. The crude product was purified by flash column silica gel chromatography (96:4 hexanes:Et<sub>2</sub>O) to

give a 19:1 mixture of diastereomers of epoxide **9** (0.495 g, 1.49 mmol) as a white amorphous solid in 95% yield. <sup>1</sup>H NMR (CDCl<sub>3</sub>, 500 MHz, major diastereomer) δ 0.53 (s, 3H), 0.77 (s, 3H), 1.01 (s, 3H), 1.26 (d, *J* = 7.0 Hz, 3H), 1.27 (d, *J* = 7.0 Hz, 3H), 1.49-1.76 (m, 4H), 1.81-1.91 (m, 1H), 2.22-2.27 (m, 1H), 3.00 (d, *J* = 4.0 Hz, 1H), 3.12 (d, *J* = 4.0 Hz, 1H), 3.52 (septet, *J* = 7.0 Hz, 1H), 3.78 (s, 6H), 6.55 (s, 2H). <sup>13</sup>C NMR (CDCl<sub>3</sub>, 125 MHz) δ 19.5, 21.2 (2C, CHCH<sub>3</sub>), 24.2, 26.3, 27.2, 29.6, 35.7, 35.9, 39.7, 42.7, 47.5, 56.2, 65.1, 103.7, 122.6, 146.1, 158.5. IR (NaCl) 2960, 2935, 2871, 1606, 1574, 1463, 1451, 1135. Anal. Calcd. for C<sub>21</sub>H<sub>32</sub>O<sub>3</sub>: C, 75.86; H, 9.70; found: C, 75.58; H, 10.04.

**Table S1.** Identification of Lewis Acid Promoters for the Synthesis of Tetrahydrofluorene **8** from Epoxide **9**<sup>a</sup>

| 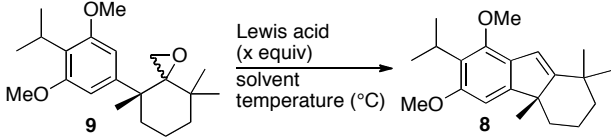 |                                             |                                     |                  |                        |
|------------------------------------------------------------------------------------|---------------------------------------------|-------------------------------------|------------------|------------------------|
| Entry                                                                              | Lewis Acid (equiv)                          | Solvent                             | Temperature (°C) | Yield (%) <sup>b</sup> |
| 1                                                                                  | BF <sub>3</sub> ·OEt <sub>2</sub> (1.0)     | CH <sub>2</sub> Cl <sub>2</sub>     | rt               | <5                     |
| 2                                                                                  | BF <sub>3</sub> ·OEt <sub>2</sub> (1.0)     | CH <sub>2</sub> Cl <sub>2</sub>     | 0                | 15                     |
| 3                                                                                  | <b>BF<sub>3</sub>·OEt<sub>2</sub> (1.0)</b> | <b>CH<sub>2</sub>Cl<sub>2</sub></b> | <b>-20</b>       | <b>50-70</b>           |
| 4                                                                                  | MABR (2.0) <sup>c</sup>                     | CH <sub>2</sub> Cl <sub>2</sub>     | rt               | <5                     |
| 5                                                                                  | MABR (2.0) <sup>c</sup>                     | CH <sub>2</sub> Cl <sub>2</sub>     | 0                | <5                     |
| 6                                                                                  | MABR (2.0) <sup>c</sup>                     | CH <sub>2</sub> Cl <sub>2</sub>     | -20              | <5                     |
| 7                                                                                  | In(OTf) <sub>3</sub> (1.0)                  | toluene                             | rt               | 15                     |
| 8                                                                                  | InCl <sub>3</sub> (1.0)                     | toluene                             | rt               | 17                     |
| 9                                                                                  | Bi(OTf) <sub>3</sub> (1.0)                  | toluene                             | rt               | 47                     |
| 10                                                                                 | Bi(OTf) <sub>3</sub> (1.0)                  | benzene                             | rt               | 58                     |
| 11                                                                                 | Bi(OTf) <sub>3</sub> (1.0)                  | CH <sub>2</sub> Cl <sub>2</sub>     | rt               | 46                     |
| 12                                                                                 | Bi(OTf) <sub>3</sub> (1.0)                  | THF                                 | rt               | 43                     |
| 13                                                                                 | Bi(OTf) <sub>3</sub> (1.0)                  | Et <sub>2</sub> O                   | rt               | 55                     |
| 14                                                                                 | Bi(OTf) <sub>3</sub> (1.0)                  | benzene                             | 0                | 47                     |
| 15                                                                                 | Bi(OTf) <sub>3</sub> (1.0)                  | benzene                             | 40               | 64                     |
| 16                                                                                 | Bi(OTf) <sub>3</sub> (0.50)                 | benzene                             | 40               | 64                     |
| 17                                                                                 | Bi(OTf) <sub>3</sub> (0.20)                 | benzene                             | 40               | 60                     |
| 18                                                                                 | Bi(OTf) <sub>3</sub> (2.0)                  | benzene                             | rt               | 56                     |
| 19                                                                                 | Bi(OTf) <sub>3</sub> (0.50)                 | benzene                             | rt               | 54                     |
| 20                                                                                 | Bi(OTf) <sub>3</sub> (0.20)                 | benzene                             | rt               | 56                     |
| 21                                                                                 | Bi(OTf) <sub>3</sub> (0.10)                 | benzene                             | rt               | 50                     |
| 22                                                                                 | BiCl <sub>3</sub> (1.0)                     | toluene                             | rt               | 47                     |
| 23                                                                                 | BiCl <sub>3</sub> (1.0)                     | benzene                             | rt               | 52                     |
| 24                                                                                 | BiCl <sub>3</sub> (1.0)                     | benzene                             | 40               | 57                     |
| 25                                                                                 | BiCl <sub>3</sub> (0.50)                    | benzene                             | 40               | 61                     |
| 26                                                                                 | <b>BiCl<sub>3</sub> (0.20)</b>              | <b>benzene</b>                      | <b>40</b>        | <b>67</b>              |

<sup>a</sup> Reactions conducted on 10 mg (0.030 mmol) of **9** in 1 mL of solvent. <sup>b</sup> Yields determined by GC-MS with dodecane (5 μL) as the internal standard. <sup>c</sup> MABR = methylaluminum bis(4-bromo-2,6-di-*tert*-butylphenoxide).

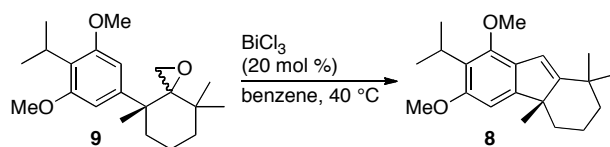

**$\text{BiCl}_3$ -Promoted Synthesis of (*R*)-7-isopropyl-6,8-dimethoxy-1,1,4a-trimethyl-2,3,4,4a-tetrahydro-1*H*-fluorene (**8**):**<sup>5</sup> In a nitrogen-filled glovebox to a 20 mL vial was added  $\text{BiCl}_3$  (0.0379 g, 0.120 mmol), epoxide **9** (0.200 g, 0.602 mmol), and benzene (15 mL). The vial was sealed with a PTFE-lined cap and removed from the glovebox. The reaction mixture was heated in an oil bath at  $40\text{ }^\circ\text{C}$  for 8 h. The vial was removed from the oil bath and allowed to cool to room temperature. The reaction mixture was filtered through a plug of silica gel (eluting with  $\text{Et}_2\text{O}$ ) and concentrated under reduced pressure. The crude product was purified by flash column silica gel chromatography (99:1 hexanes: $\text{Et}_2\text{O}$ ) to give tetrahydrofluorene **8** (0.122 g, 0.388 mmol) as a white amorphous solid in 64% yield. *Note: A dry-packed silica gel column leads to improved separation of **8** from a byproduct of similar polarity.*  $[\alpha]_{\text{D}}^{24} = +7.8$  (c 0.21,  $\text{CHCl}_3$ , 94% ee).  $^1\text{H}$  NMR ( $\text{CDCl}_3$ , 500 MHz)  $\delta$  1.01 (ddd,  $J = 13.0, 13.0, 3.5$  Hz, 1H), 1.10 (ddd,  $J = 13.0, 13.0, 4.0$  Hz, 1H), 1.23 (s, 3H), 1.30 (s, 3H), 1.32 (d,  $J = 7.0$  Hz, 3H), 1.33 (d,  $J = 7.0$  Hz, 3H), 1.35 (s, 3H), 1.58-1.66 (m, 2H), 1.89-2.00 (m, 1H), 2.05-2.09 (m, 1H), 3.54 (septet,  $J = 7.0$  Hz, 1H), 3.82 (s, 3H), 3.86 (s, 3H), 6.41 (s, 1H), 6.60 (s, 1H).  $^{13}\text{C}$  NMR ( $\text{CDCl}_3$ , 125 MHz)  $\delta$  20.1, 21.6, 21.7, 24.0, 25.1, 25.7, 31.5, 35.7, 38.4, 43.0, 51.5, 56.2, 62.1, 101.7, 117.1, 126.7, 127.0, 151.8, 155.3, 157.1, 161.2. IR (NaCl) 2998, 2960, 2934, 2868, 1612, 1588, 1569, 1455, 1416, 1307, 1137, 1108, 1055, 1024. HRMS (ESI) calcd. for  $\text{C}_{21}\text{H}_{31}\text{O}_2^+$   $[\text{M}+\text{H}]^+$ : 315.2324; found 315.2328.

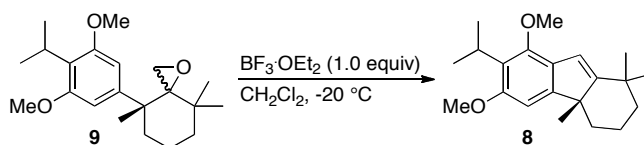

**$\text{BF}_3 \cdot \text{OEt}_2$ -Promoted Synthesis of (*R*)-7-isopropyl-6,8-dimethoxy-1,1,4a-trimethyl-2,3,4,4a-tetrahydro-1*H*-fluorene (**8**):**<sup>5</sup> To a solution of epoxide **9** (0.250 g, 0.753 mmol) in  $\text{CH}_2\text{Cl}_2$  (20 mL) at  $-20\text{ }^\circ\text{C}$  was added dropwise a pre-cooled solution of  $\text{BF}_3 \cdot \text{OEt}_2$  (95.0  $\mu\text{L}$  0.753 mmol) in  $\text{CH}_2\text{Cl}_2$  (5 mL). The solution was stirred at  $-20\text{ }^\circ\text{C}$  for 20 h. The reaction was quenched with saturated aqueous  $\text{NaHCO}_3$  and extracted with  $\text{CH}_2\text{Cl}_2$  (3x). The combined organic layers were washed with brine, dried over  $\text{MgSO}_4$ , filtered, and concentrated under reduced pressure. The crude product was purified by flash column silica gel chromatography (99:1 hexanes: $\text{Et}_2\text{O}$ ) to give tetrahydrofluorene **8** (0.177 g, 0.563 mmol) as a white amorphous solid in 75% yield. *Note: A dry-packed silica gel column leads to improved separation of **8** from a byproduct of similar polarity.* Spectroscopic data was identical to that reported for the  $\text{BiCl}_3$ -promoted synthesis of **8** (*vide supra*).

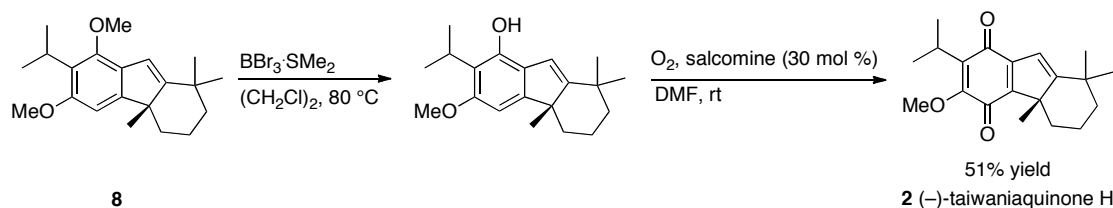

**(-)-Taiwaniaquinone H (2):**<sup>5,6</sup> Taiwaniaquinone was prepared according to a modified procedure based on methods reported by Trauner and coworkers.<sup>5</sup> To a solution of tetrahydrofluorene **8** (0.0200 g, 0.0636 mmol) in (CH<sub>2</sub>Cl)<sub>2</sub> (3 mL) at room temperature was added BBr<sub>3</sub>·SMe<sub>2</sub> as a 1 M solution in CH<sub>2</sub>Cl<sub>2</sub> (763 μL, 0.763 mmol). The resulting solution was heated in an oil bath at 80 °C for 2 h. The reaction mixture was cooled to room temperature, quenched with saturated aqueous NaHCO<sub>3</sub>, and extracted with Et<sub>2</sub>O. The combined organic layers were washed with brine, dried over MgSO<sub>4</sub>, filtered, and concentrated under reduced pressure. The crude mixture was filtered through a 1-inch column of silica gel (eluting with 90:10 hexanes:Et<sub>2</sub>O) to remove baseline impurities. The solution containing the monodemethylated tetrahydrofluoren-1-ol was concentrated under reduced pressure, and the resulting residue was used without further purification.<sup>7</sup> To the crude tetrahydrofluoren-1-ol intermediate in DMF (1.5 mL) was added salcomine (0.0062 g, 0.019 mmol). Oxygen was bubbled through the resulting solution at room temperature for 6 h. The reaction was quenched with H<sub>2</sub>O and extracted with Et<sub>2</sub>O (3x). The combined organic layers were washed with brine, dried over MgSO<sub>4</sub>, filtered, and concentrated under reduced pressure. The crude product was purified by flash column silica gel chromatography (98:2 to 97:3 hexanes:Et<sub>2</sub>O) to give (-)-taiwaniaquinone H **2** (0.0102 g, 0.0324 mmol) as an amorphous orange solid in 51% yield. m.p. = 81–83 °C (lit. values for racemic material, 83–84.5 °C<sup>5</sup> and 75–76 °C<sup>6g</sup>). [α]<sub>D</sub><sup>24</sup> = -90.9 (c 0.13, CHCl<sub>3</sub>, 94% ee). Published values of the optical rotation for Taiwaniaquinone H vary from [α]<sub>D</sub> = -95.7 to -9.0 (see reference 6c); the value we report is consistent with that of the material prepared by Gademann and coworkers described in reference 6c. <sup>1</sup>H NMR (CDCl<sub>3</sub>, 500 MHz) δ 1.04–1.13 (m, 2H), 1.219 (s, 3H), 1.223 (d, *J* = 7.0 Hz, 3H), 1.226 (d, *J* = 7.0 Hz, 3H), 1.27 (s, 3H), 1.44 (s, 3H), 1.60–1.64 (m, 1H), 1.66–1.71 (m, 1H), 1.86–1.97 (m, 1H), 2.37–2.42 (m, 1H), 3.25 (septet, *J* = 7.0 Hz, 1H), 3.98 (s, 1H), 6.37 (s, 1H). <sup>13</sup>C NMR (CDCl<sub>3</sub>, 125 MHz) δ 19.3, 20.4, 20.89, 20.91, 24.7, 25.0, 31.2, 36.9, 37.5, 43.6, 55.8, 61.6, 116.9, 136.2, 146.0, 150.8, 157.5, 176.0, 179.0, 186.5. IR (NaCl) 2934, 1646, 1538, 1465, 1294, 1159, 1029. HRMS (ESI) calcd. for C<sub>20</sub>H<sub>27</sub>O<sub>3</sub><sup>+</sup> [M+H]<sup>+</sup>: 315.1960; found 315.1963.

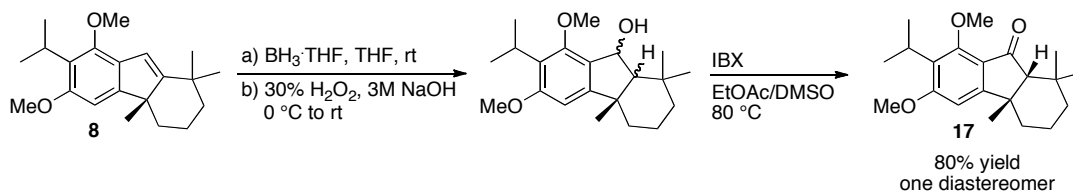

**(4aS,9aR)-7-isopropyl-6,8-dimethoxy-1,1,4a-trimethyl-2,3,4,4a-tetrahydro-1H-fluoren-9(9aH)-one (17):**<sup>5,8</sup> In a nitrogen-filled glovebox to a 20-mL vial was added tetrahydrofluorene **8** (0.0350 g, 0.111 mmol) and THF (3 mL). The vial was sealed with PTFE/silicone-lined septum cap and removed from the glovebox. A 1 M solution of BH<sub>3</sub>·THF (900 μL, 0.900 mmol) was added to the reaction mixture at room temperature. The reaction mixture was stirred for 4 h

at room temperature, then cooled to 0 °C. The reaction was quenched by dropwise addition of H<sub>2</sub>O (250 µL) at 0 °C. An aqueous solution of 3 M NaOH (1.80 mL, 5.40 mmol) was then added to the mixture, followed by addition of 30% w/w H<sub>2</sub>O<sub>2</sub> (480 µL, 2.15 mmol). The resulting mixture was stirred at 0 °C for 30 min, then allowed to warm to room temperature and stirred for 1.5 h. The reaction mixture was diluted with H<sub>2</sub>O (5 mL) and extracted with Et<sub>2</sub>O (3x). The combined organic layers were washed with brine, dried over MgSO<sub>4</sub>, filtered, and concentrated under reduced pressure. The crude reaction mixture containing a diastereomeric mixture of hexahydrofluoren-9-ols was filtered through a 1-inch column of silica gel (eluting with 90:10 hexanes:Et<sub>2</sub>O) to remove baseline impurities. After concentration, the diastereomeric mixture of hexahydrofluoren-9-ols was used without further purification. To the diastereomeric mixture of hexahydrofluoren-9-ols in EtOAc (2.6 mL) and DMSO (1.3 mL) was added IBX (0.0343 g, 0.122 mmol). The vial was resealed with a PTFE-lined cap and heated in an oil bath at 80 °C for 2 h. The vial was removed from the oil bath and cooled to room temperature. The reaction mixture was quenched by addition of saturated aqueous Na<sub>2</sub>SO<sub>3</sub> (0.5 mL) and stirred at room temperature for 10 min. The reaction mixture was poured into saturated aqueous NaHCO<sub>3</sub> (4 mL) and extracted with EtOAc (3x). The combined organic layers were washed with brine, dried over MgSO<sub>4</sub>, filtered, and concentrated under reduced pressure. The crude product was purified by flash column silica gel chromatography to give diastereomerically pure tetrahydrofluoren-9-one **17** (0.0292 g, 0.0884 mmol) as a white amorphous solid in 80% yield.  $[\alpha]_D^{25} = -35.5$  (c 0.18, CHCl<sub>3</sub>, 94% ee). <sup>1</sup>H NMR (CDCl<sub>3</sub>, 500 MHz) δ 0.70 (s, 3H), 1.22 (s, 3H), 1.25 (s, 3H), 1.28 (d, *J* = 7.0 Hz, 6H), 1.29-1.39 (m, 2H), 1.40-1.50 (m, 1H), 1.54-1.65 (m, 2H), 2.03-2.09 (m, 1H), 2.11 (s, 1H), 3.57 (septet, *J* = 7.0 Hz, 1H), 3.89 (s, 3H), 3.91 (s, 3H), 6.56 (s, 1H). <sup>13</sup>C NMR (CDCl<sub>3</sub>, 125 MHz) δ 18.5, 21.3, 24.6, 24.7, 32.6, 33.4, 34.1, 34.6, 38.7, 41.5, 55.8, 62.2, 65.8, 99.8, 121.8, 128.2, 157.1, 164.1, 164.9, 204.6. IR (NaCl) 2959, 2936, 2872, 1690, 1588, 1461, 1322, 1137. HRMS (ESI) calcd. for C<sub>21</sub>H<sub>31</sub>O<sub>3</sub><sup>+</sup> [M+H]<sup>+</sup>: 331.2273; found 331.2275.

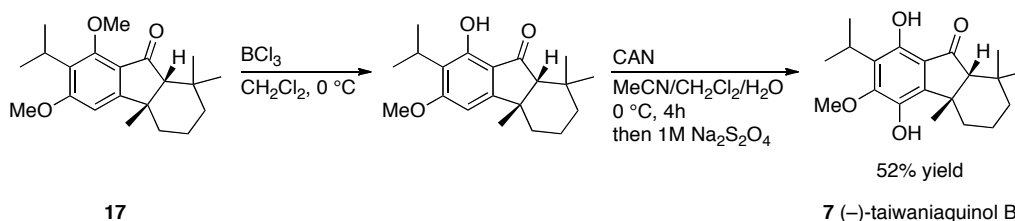

**(-)-Taiwaniaquinonol B (7):**<sup>5,8,9</sup> To tetrahydrofluoren-9-one **17** (0.0150 g, 0.0454 mmol) in CH<sub>2</sub>Cl<sub>2</sub> (1.2 mL) at 0 °C was added a 1 M solution of BCl<sub>3</sub> in hexanes (57 µL, 0.057 mmol). The resulting solution was stirred at 0 °C for 30 min. The reaction mixture was quenched with H<sub>2</sub>O (3 mL) and extracted with CH<sub>2</sub>Cl<sub>2</sub> (3x). The combined organic layers were washed with brine, dried over MgSO<sub>4</sub>, filtered, and concentrated under reduced pressure to provide the 8-hydroxyfluoren-9-one intermediate,<sup>10</sup> which was used without further purification. To the 8-hydroxyfluoren-9-one intermediate in MeCN (1.4 mL) and CH<sub>2</sub>Cl<sub>2</sub> (0.1 mL) at 0 °C was added ceric ammonium nitrate (0.0946 g, 0.173 mmol) as a solution in H<sub>2</sub>O (0.7 mL). The reaction mixture was stirred at 0 °C for 4 h, then quenched with an aqueous 1M solution of Na<sub>2</sub>S<sub>2</sub>O<sub>4</sub> (1.0 mL). The reaction mixture was diluted with water (3 mL) and extracted with EtOAc (3x). The combined organic layers were washed with brine, dried over MgSO<sub>4</sub>, filtered, and concentrated under reduced pressure. The crude product was purified by flash column silica gel

chromatography (90:10 hexanes:EtOAc) to give (–)-taiwaniaquinonol B **7** (0.0078 g, 0.023 mmol) as an off-white solid in 52% yield. m.p. = 137–139 °C (lit. value from isolation of (–)-taiwaniaquinonol B,<sup>9a</sup> 142–144 °C; lit. values for racemic taiwaniaquinol B: 133.5–134.5 °C,<sup>5</sup> 140–141 °C,<sup>6g</sup> and 133–134 °C<sup>8a</sup>).  $[\alpha]_D^{23} = -36.0$  (c 0.15, CHCl<sub>3</sub>, 94% ee) (lit. value,  $[\alpha]_D^{31} = -37.7$  (c 0.27, CHCl<sub>3</sub>)). <sup>1</sup>H NMR (CDCl<sub>3</sub>, 500 MHz)  $\delta$  0.88 (s, 3H), 1.26 (s, 3H), 1.385 (d,  $J = 7.0$  Hz, 3H), 1.387 (d,  $J = 7.0$  Hz, 3H), 1.37–1.44 (m, 2H), 1.45 (s, 3H), 1.52–1.64 (m, 1H), 1.66–1.76 (m, 1H), 1.95–2.10 (m, 2H), 2.12 (s, 1H), 3.27 (septet,  $J = 7.0$  Hz, 1H), 3.80 (s, 3H), 5.25 (s, 1H), 9.52 (s, 1H). <sup>13</sup>C NMR (CDCl<sub>3</sub>, 125 MHz)  $\delta$  17.8, 20.9 (2C, CHCH<sub>3</sub>), 24.7, 26.2, 29.1, 30.7, 33.2, 34.6, 36.8, 43.0, 62.3, 65.5, 118.6, 126.5, 138.7, 143.0, 151.4, 152.7, 211.2. IR (NaCl) 3524 (br), 2960, 1661, 1629, 1428, 1331, 1117, 1015. HRMS (ESI) calcd. for C<sub>20</sub>H<sub>29</sub>O<sub>4</sub><sup>+</sup> [M+H]<sup>+</sup>: 333.2066; found 333.2067.

## References

- (1) Maruoka, K.; Murase, N.; Bureau, R.; Ooi, T.; Yamamoto, H. *Tetrahedron* **1994**, *50*, 3663–3672.
- (2) Frigerio, M.; Santagostino, M.; Sputore, S. *J. Org. Chem.* **1999**, *64*, 4537–4538.
- (3) Engler, T. A.; Sampath, U.; Naganathan, S.; Vander Velde, D.; Takusagawa, F.; Yohannes, D. *J. Org. Chem.* **1989**, *54*, 5712–5727.
- (4) (a) Chieffi, A.; Kamikawa, K.; Ahman, J.; Fox, J. M.; Buchwald, S. L. *Org. Lett.* **2001**, *3*, 1897–1900; (b) Woodward, R. B.; Sondheimer, F.; Taub, D.; Heusler, K.; McLamore, W. M. *J. Am. Chem. Soc.* **1952**, *74*, 4223–4251.
- (5) Liang, G.; Xu, Y.; Seiple, I. B.; Trauner, D. *J. Am. Chem. Soc.* **2006**, *128*, 11022–11023.
- (6) Isolation: (a) Chang, C. I.; Chang, J. Y.; Kuo, C. C.; Pan, W. Y.; Kuo, Y. H. *Planta Med.* **2005**, *71*, 72–76. Asymmetric syntheses: (b) Node, M.; Ozeki, M.; Planas, L.; Nakano, M.; Takita, H.; Mori, D.; Tamatani, S.; Kajimoto, T. *J. Org. Chem.* **2010**, *75*, 190–196. (c) Jana, C. K.; Scopelliti, R.; Gademann, K. *Chem. Eur. J.* **2010**, *16*, 7692–7695. (d) Jana, C. K.; Scopelliti, R.; Gademann, K. *Synthesis*, **2010**, 2223–2232. (e) Alvarez-Manzaneda, E.; Chahboun, R.; Cabrera, E.; Alvarez, E.; Haidour, A.; Ramos, J. M.; Alvarez-Manzaneda, R.; Charrah, Y.; Es-Samti, H. *Org. Biomol. Chem.* **2009**, *7*, 5146–5155. Racemic syntheses: (f) Alvarez-Manzaneda, E.; Chahboun, R.; Cabrera, E.; Alvarez, E.; Alvarez-Manzaneda, R.; Meneses, R.; Es-Samti, H.; Fernández, A. *J. Org. Chem.* **2009**, *74*, 3384–3388. (g) Banerjee, M.; Mukhopadhyay, R.; Achari, B.; Banerjee, A. K. *J. Org. Chem.* **2006**, *71*, 2787–2796.
- (7) For spectroscopic data of the tetrahydrofluoren-1-ol intermediate, see reference 5 in the Supporting Information.
- (8) Racemic syntheses in addition to reference 5: (a) Fillion, E.; Fishlock, D. *J. Am. Chem. Soc.* **2005**, *127*, 13144–13145. (b) Tang, S.; Xu, Y.; He, J.; He, Y.; Zheng, J.; Pan, X.; She, X. *Org. Lett.* **2008**, *10*, 1855–1858.
- (9) Isolation: (a) Lin, W. H.; Fang, J. M.; Cheng, Y. S. *Phytochemistry* **1995**, *40*, 871–873. Additional racemic syntheses: (b) Majetich, G.; Shimkus, J. M. *Tetrahedron Lett.* **2009**, *50*, 3311–3313. (c) Li, S.; Chiu, P. *Tetrahedron Lett.* **2008**, *49*, 1741–1744. (d) Banerjee, M.; Mukhopadhyay, R.; Achari, B.; Banerjee, A. K. *J. Org. Chem.* **2006**, *71*, 2787–2796.
- (10) For spectroscopic data of the 8-hydroxyfluoren-9-one intermediate, see reference 8a in the Supporting Information.

liao, lxb-5-176C

exp2 s2pul

| SAMPLE              |                | DEC. & VT  |          |
|---------------------|----------------|------------|----------|
| date                | Nov 17 2008    | dfrq       | 499.692  |
| solvent             | CDCl3          | dn         | H1       |
| file                | /export/home/~ | dpwr       | 44       |
| data/Hartwig/stanl~ |                | dof        | -827.6   |
| eyl/lxb-5-174C.fid  |                | dm         | YYY      |
| ACQUISITION         |                | dmm        | w        |
| sfrq                | 125.661        | dmf        | 19608    |
| tn                  | C13            | dseq       |          |
| at                  | 1.086          | dres       | 90.0     |
| np                  | 65536          | homo       | n        |
| sw                  | 30165.9        |            | DEC2     |
| fb                  | 17000          | dfrq2      | 0        |
| bs                  | 16             | dn2        |          |
| ss                  | 1              | dpwr2      | 1        |
| tpwr                | 54             | dof2       | 0        |
| pw                  | 6.0            | dm2        | n        |
| d1                  | 1.000          | dmm2       | c        |
| tof                 | 1884.7         | dmf2       | 10000    |
| nt                  | 1000           | dseq2      |          |
| ct                  | 1000           | dres2      | 1.0      |
| alock               | n              | homo2      | n        |
| gain                | not used       | PROCESSING |          |
| FLAGS               |                | lb         | 1.00     |
| il                  | n              | wtfile     |          |
| in                  | n              | proc       | ft       |
| dp                  | y              | fn         | not used |
| hs                  | nn             | math       | f        |
| DISPLAY             |                |            |          |
| sp                  | -1267.9        | werr       |          |
| wp                  | 30165.0        | wexp       |          |
| vs                  | 140            | wbs        |          |
| sc                  | 0              | wnt        |          |
| wc                  | 250            |            |          |
| hzmm                | 120.66         |            |          |
| is                  | 500.00         |            |          |
| rfl                 | 10972.5        |            |          |
| rfp                 | 9703.7         |            |          |
| th                  | 68             |            |          |
| ins                 | 100.000        |            |          |
| nm                  | ph             |            |          |

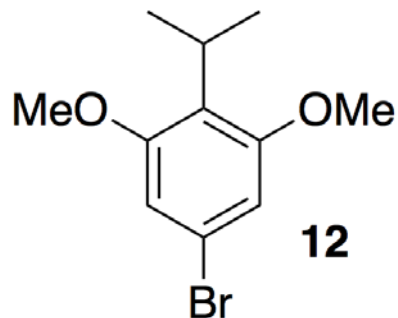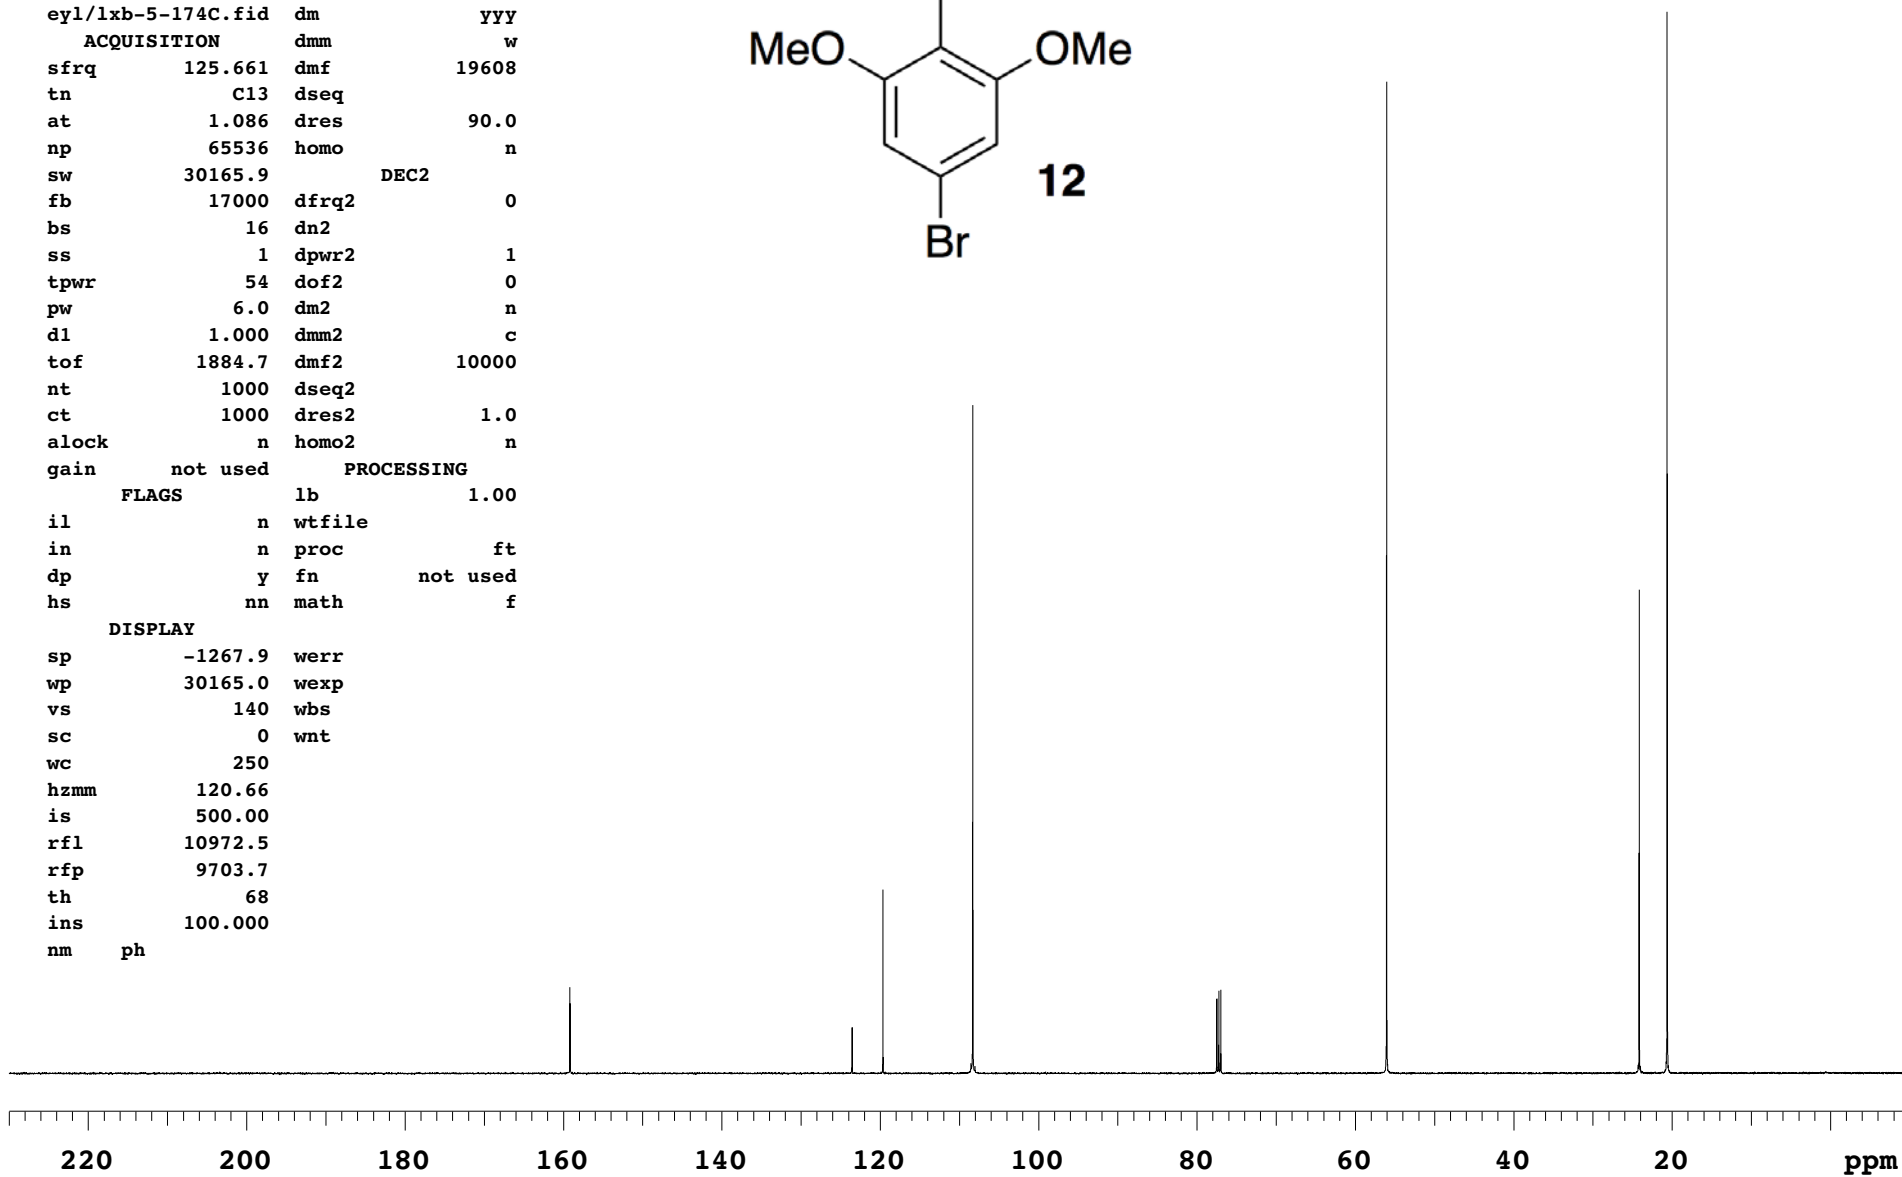

LS-V-144A-1H-U500

exp2 s2pul

| SAMPLE              |                | DEC. & VT  |          |
|---------------------|----------------|------------|----------|
| date                | Nov 2 2010     | dfrq       | 499.693  |
| solvent             | CDC13          | dn         | H1       |
| file                | /export/home/~ | dpwr       | 20       |
| data/Hartwig/stanl~ |                | dof        | 0        |
| eyl/LS-V-144A-1H-U~ |                | dm         | nnn      |
| 500.fid             |                | dmm        | c        |
| ACQUISITION         |                | dmf        | 200      |
| sfrq                | 499.693        | dseq       |          |
| tn                  | H1             | dres       | 1.0      |
| at                  | 10.000         | homo       | n        |
| np                  | 140498         | DEC2       |          |
| sw                  | 7024.9         | dfrq2      | 0        |
| fb                  | 4000           | dn2        |          |
| bs                  | 4              | dpwr2      | 1        |
| tpwr                | 63             | dof2       | 0        |
| pw                  | 6.5            | dm2        | n        |
| d1                  | 0              | dmm2       | c        |
| tof                 | 2.0            | dmf2       | 200      |
| nt                  | 16             | dseq2      |          |
| ct                  | 16             | dres2      | 1.0      |
| alock               | n              | homo2      | n        |
| gain                | not used       | PROCESSING |          |
| FLAGS               |                | lb         | 0.30     |
| il                  | n              | wtfile     |          |
| in                  | n              | proc       | ft       |
| dp                  | y              | fn         | not used |
| hs                  | nn             | math       | f        |
| DISPLAY             |                |            |          |
| sp                  | -1012.2        | werr       |          |
| wp                  | 7024.9         | wexp       |          |
| vs                  | 32             | wbs        | wft      |
| sc                  | 0              | wnt        |          |
| wc                  | 250            |            |          |
| hzmm                | 28.10          |            |          |
| is                  | 33.57          |            |          |
| rfl                 | 4640.0         |            |          |
| rfp                 | 3627.8         |            |          |
| th                  | 7              |            |          |
| ins                 | 100.000        |            |          |
| ai                  | ph             |            |          |

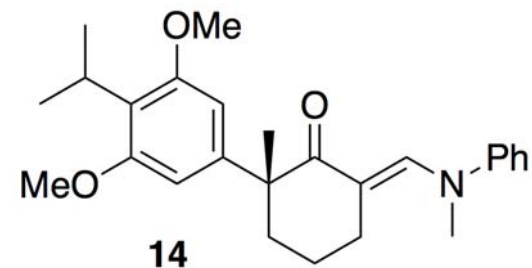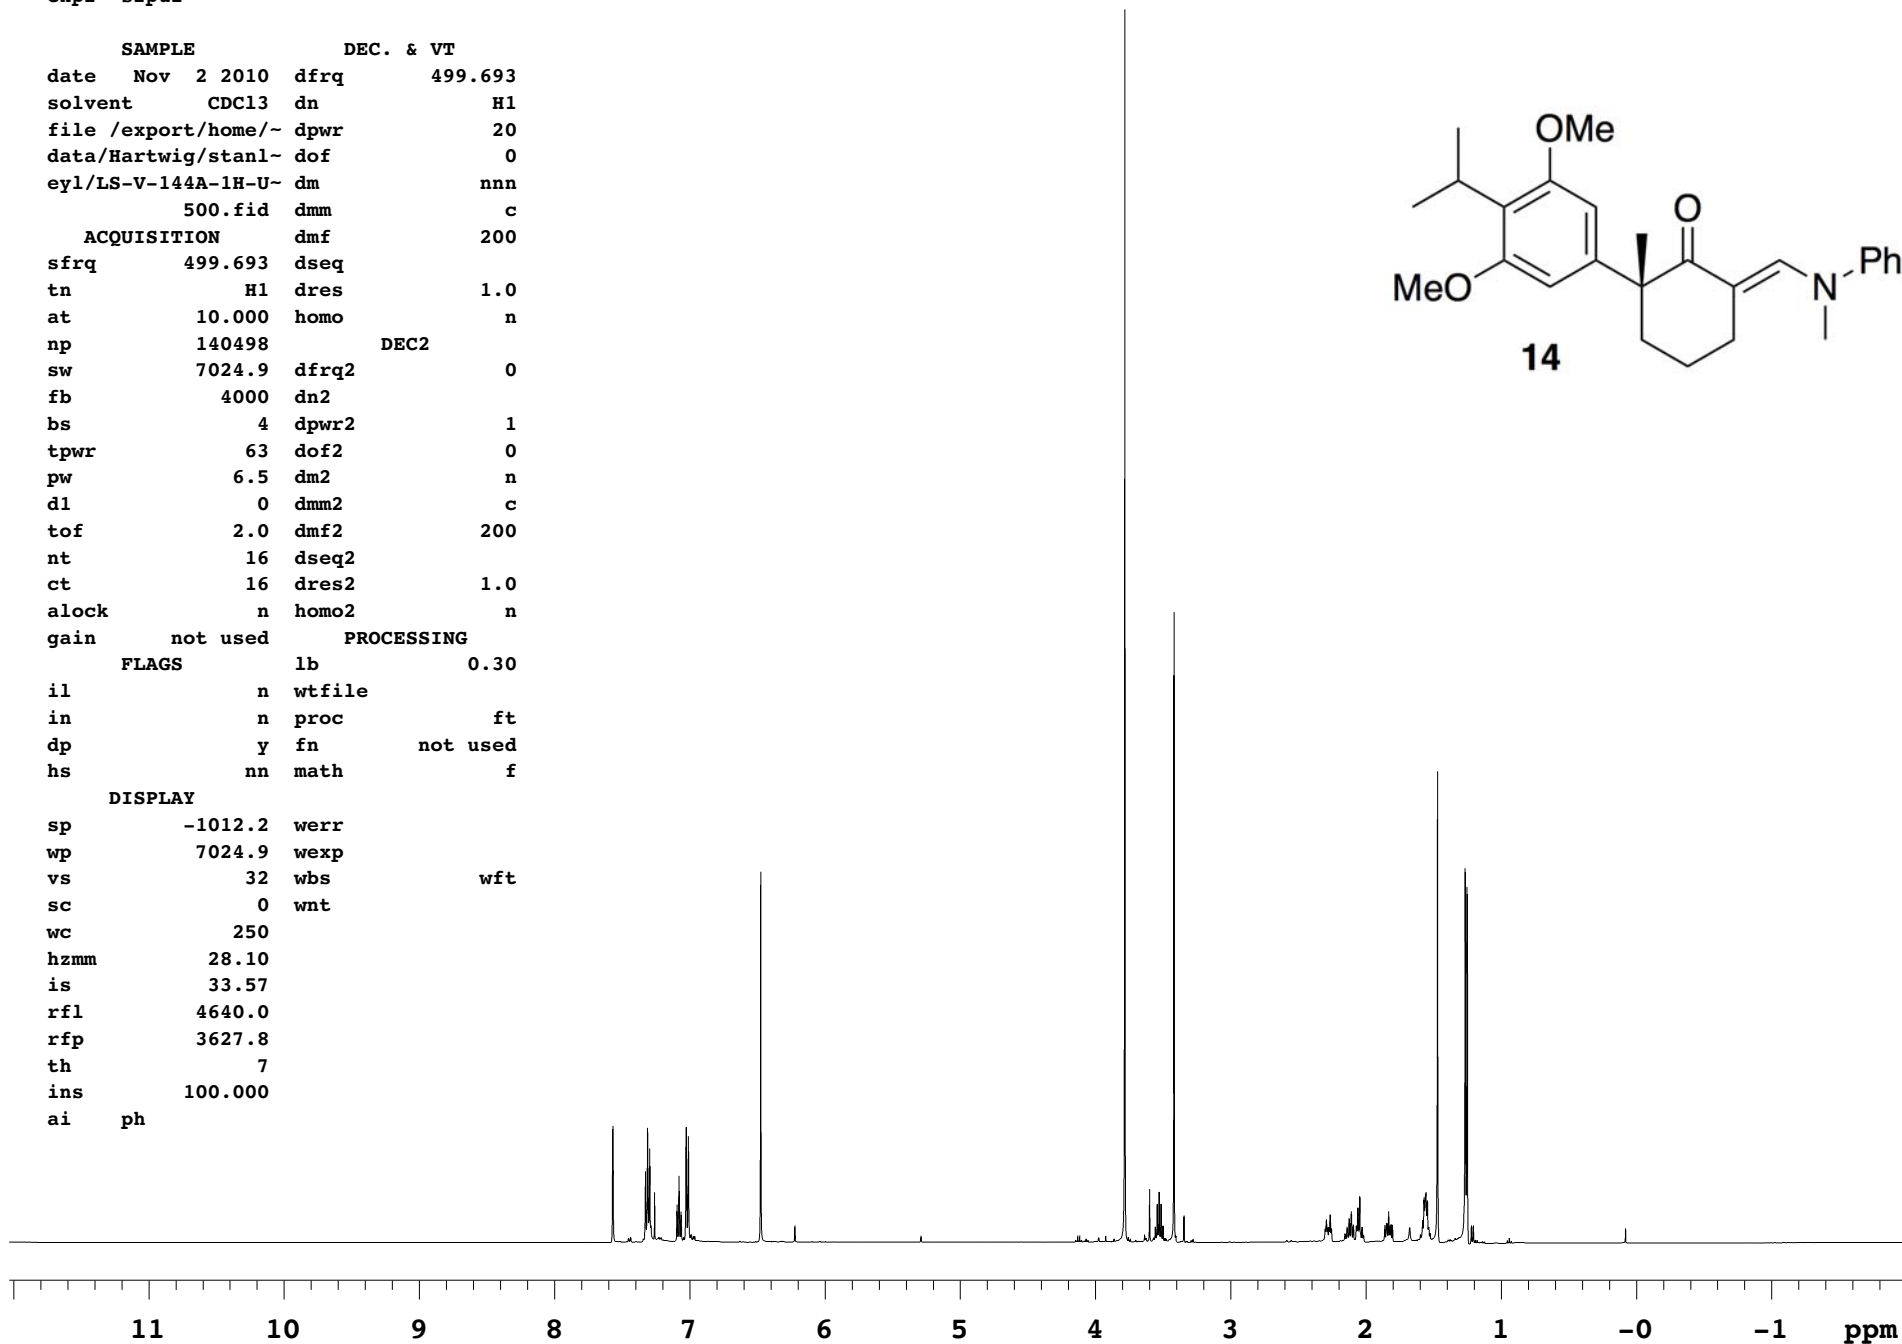

LS-V-144A-13C-U500

exp1 s2pul

| SAMPLE              |                | DEC. & VT  |          |
|---------------------|----------------|------------|----------|
| date                | Nov 2 2010     | dfrq       | 499.692  |
| solvent             | CDC13          | dn         | H1       |
| file                | /export/home/~ | dpwr       | 44       |
| data/u500/Hartwig/~ |                | dof        | -827.6   |
| stanley1/LS-V-144A- |                | dm         | YYY      |
| -13C-U500.fid       |                | dmm        | w        |
| ACQUISITION         |                | dmf        | 19608    |
| sfrq                | 125.661        | dseq       |          |
| tn                  | C13            | dres       | 90.0     |
| at                  | 4.345          | homo       | n        |
| np                  | 262144         | PROCESSING |          |
| sw                  | 30165.9        | lb         | 1.00     |
| fb                  | 17000          | wtfile     |          |
| bs                  | 16             | proc       | ft       |
| ss                  | 1              | fn         | not used |
| tpwr                | 54             | math       | f        |
| pw                  | 6.0            |            |          |
| d1                  | 1.000          | werr       |          |
| tof                 | 1884.7         | wexp       |          |
| nt                  | 2000           | wbs        | wft      |
| ct                  | 502            | wnt        |          |
| alock               | n              |            |          |
| gain                | not used       |            |          |
| FLAGS               |                |            |          |
| il                  | n              |            |          |
| in                  | n              |            |          |
| dp                  | y              |            |          |
| hs                  | nn             |            |          |
| DISPLAY             |                |            |          |
| sp                  | -1253.6        |            |          |
| wp                  | 30165.7        |            |          |
| vs                  | 120            |            |          |
| sc                  | 0              |            |          |
| wc                  | 250            |            |          |
| hzmm                | 120.66         |            |          |
| is                  | 500.00         |            |          |
| rfl                 | 10957.6        |            |          |
| rfp                 | 9703.7         |            |          |
| th                  | 8              |            |          |
| ins                 | 100.000        |            |          |
| nm                  | ph             |            |          |

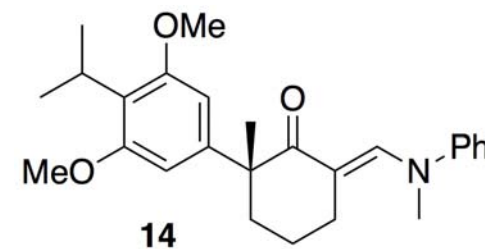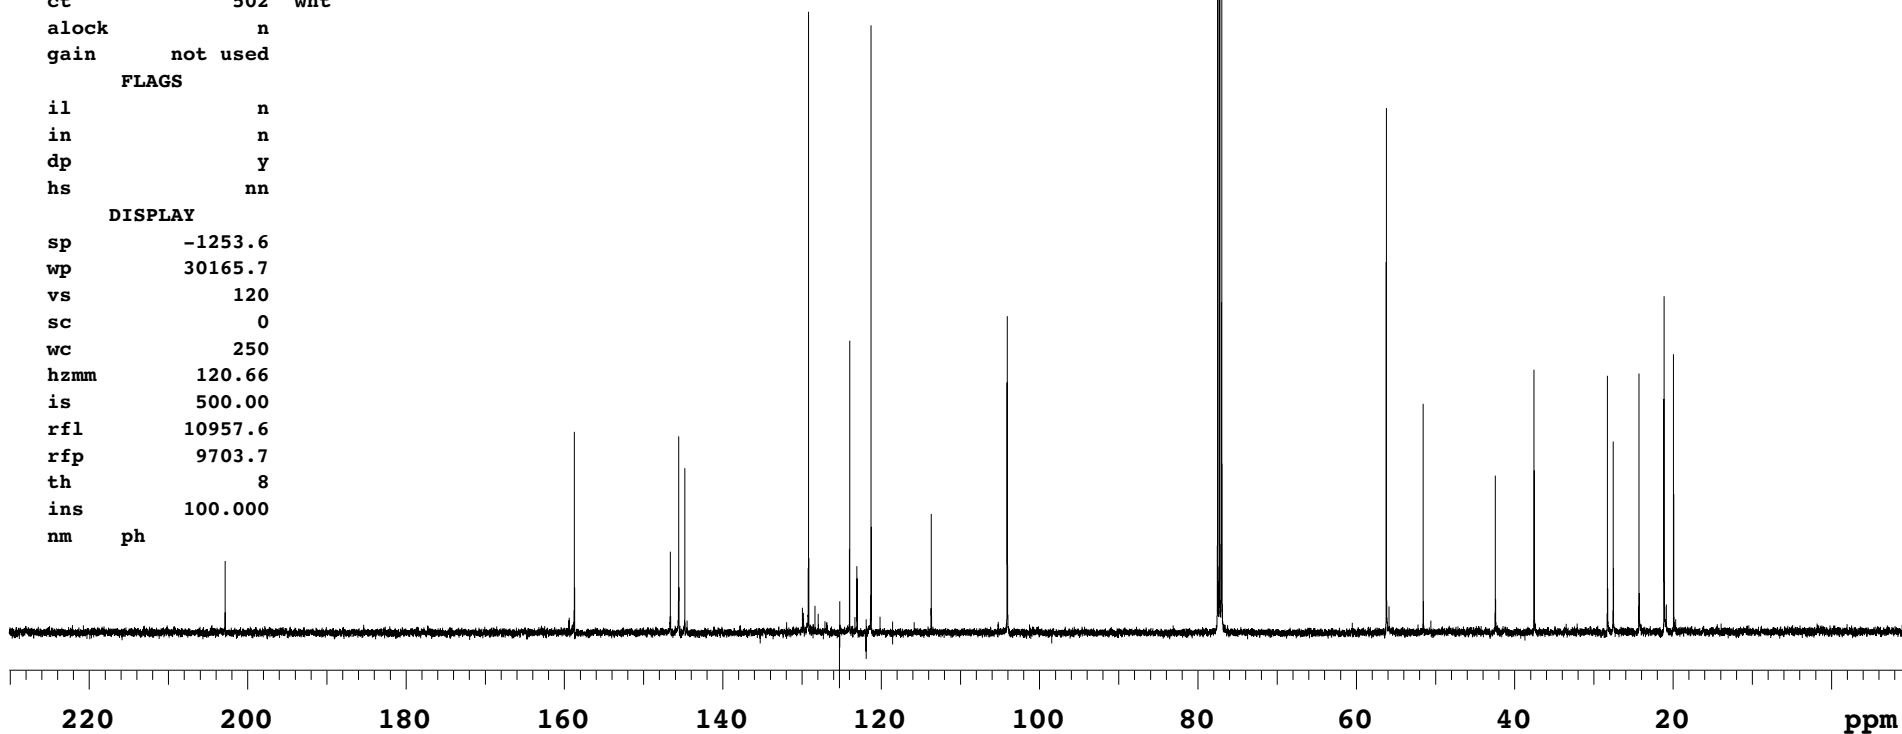

## SAMPLE INFORMATION

Sample Name: liu5-199-R  
Sample Type: Unknown  
Vial: 22  
Injection #: 1  
Injection Volume: 10.00 ul  
Run Time: 60.00 Minutes

Acquired By: HartwigGRP  
Date Acquired: 4/2/2009 12:44:25 PM  
Acq. Method: 3\_10ml\_0A\_100B\_254\_220  
Date Processed: 7/6/2010 7:21:51 AM  
Channel Name: 2487Channel 2  
Sample Set Name: liu5199

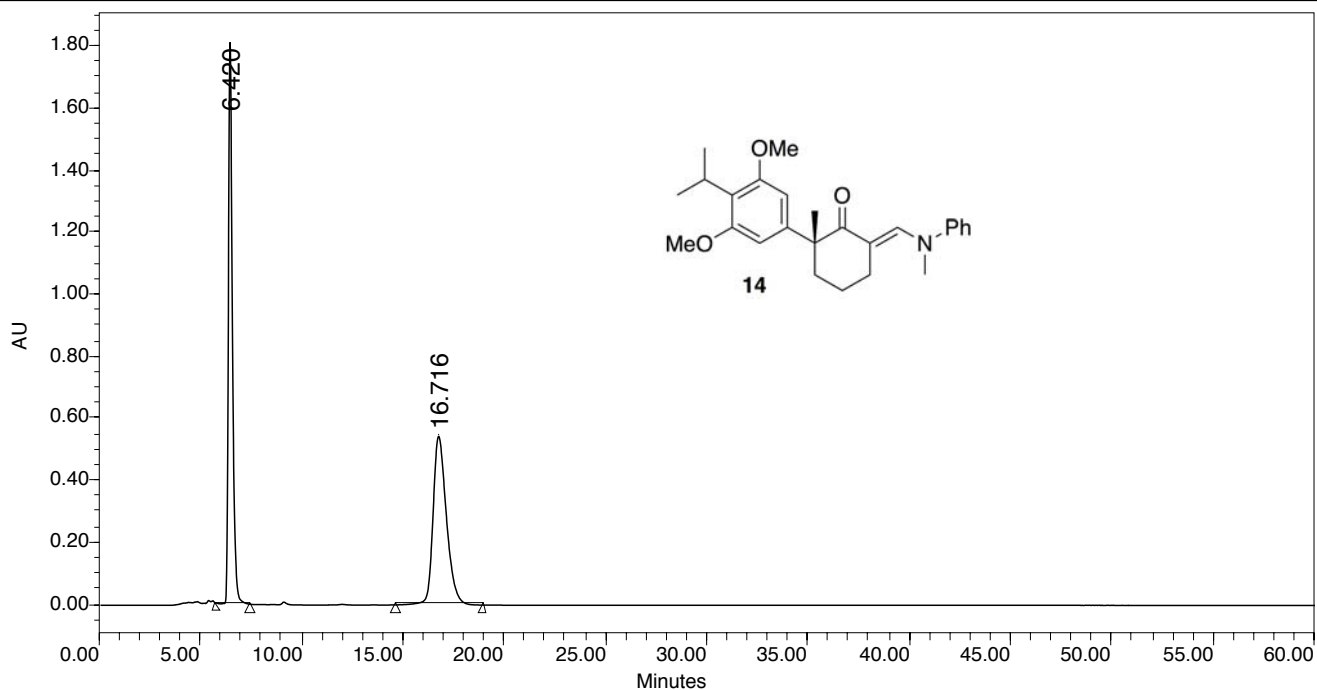

|   | RT<br>(min) | Area<br>( $\Delta$ *sec) | % Area | Height<br>( $\Delta$ ) | %<br>Height |
|---|-------------|--------------------------|--------|------------------------|-------------|
| 1 | 6.420       | 24827625                 | 49.72  | 1810514                | 76.89       |
| 2 | 16.716      | 25108373                 | 50.28  | 544100                 | 23.11       |

## SAMPLE INFORMATION

Sample Name: liu5-200-E2  
Sample Type: Unknown  
Vial: 22  
Injection #: 1  
Injection Volume: 10.00 ul  
Run Time: 30.00 Minutes

Acquired By: HartwigGRP  
Date Acquired: 4/9/2009 11:33:31 AM  
Acq. Method: 3\_10ml\_0A\_100B\_254\_220  
Date Processed: 11/4/2010 2:40:08 PM  
Channel Name: 2487Channel 2  
Sample Set Name: liu5200E

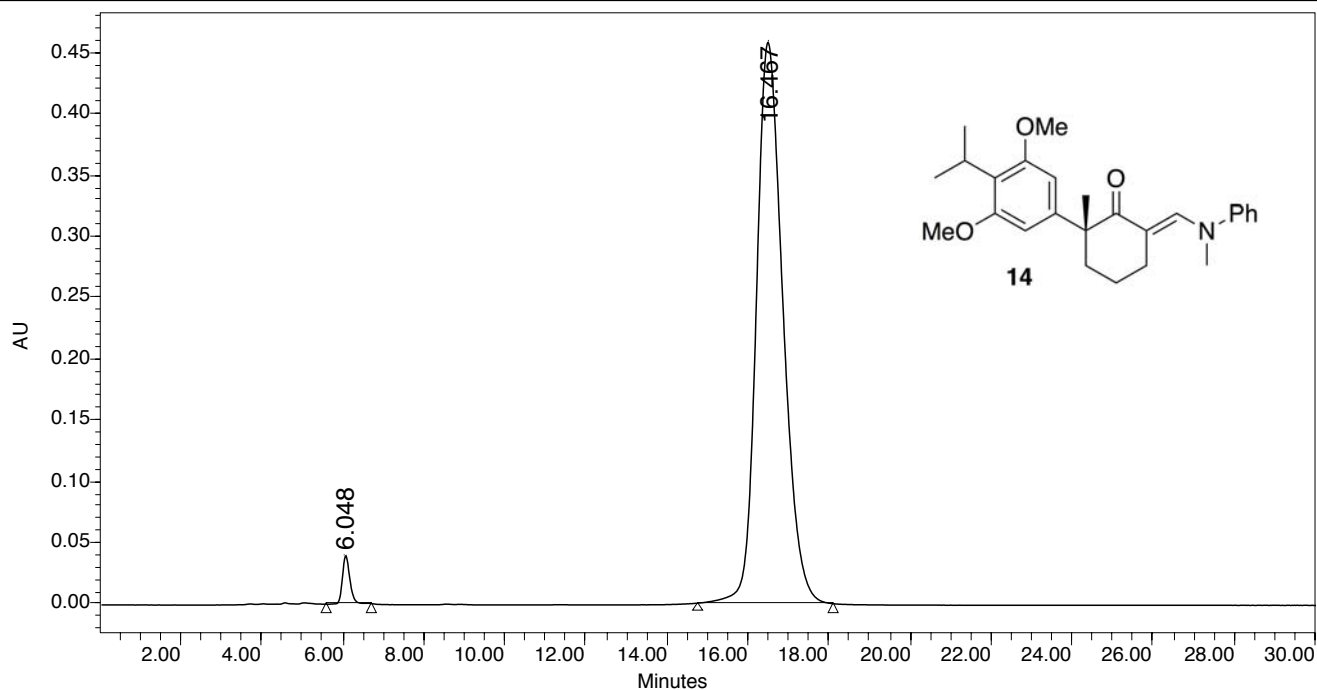

|   | RT<br>(min) | Area<br>( $\Delta$ *sec) | % Area | Height<br>( $\Delta$ ) | %<br>Height |
|---|-------------|--------------------------|--------|------------------------|-------------|
| 1 | 6.048       | 511511                   | 2.40   | 39409                  | 7.92        |
| 2 | 16.467      | 20824944                 | 97.60  | 457977                 | 92.08       |

LS-V-140-1H-VXR500

expl s2pul

| SAMPLE              |                | DEC. & VT  |          |
|---------------------|----------------|------------|----------|
| date                | Jun 11 2010    | dfrq       | 499.432  |
| solvent             | CDC13          | dn         | H1       |
| file                | /export/home/~ | dpwr       | 25       |
| data/vxr500/Hartwi~ |                | dof        | 0        |
| g/stanley1/LS-V-14~ |                | dm         | nnn      |
| 0-1H-VXR500.fid     |                | dmm        | c        |
| ACQUISITION         |                | dmf        | 200      |
| sfrq                | 499.432        | dseq       |          |
| tn                  | H1             | dres       | 1.0      |
| at                  | 4.096          | homo       | n        |
| np                  | 65536          | PROCESSING |          |
| sw                  | 8000.0         | lb         | 0.30     |
| fb                  | 4000           | wtfile     |          |
| bs                  | 4              | proc       | ft       |
| tpwr                | 62             | fn         | not used |
| pw                  | 6.8            | math       | f        |
| d1                  | 8.000          |            |          |
| tof                 | 0              | werr       |          |
| nt                  | 16             | wexp       |          |
| ct                  | 16             | wbs        | wft      |
| alock               | n              | wnt        |          |
| gain                | not used       |            |          |
| FLAGS               |                |            |          |
| il                  | n              |            |          |
| in                  | n              |            |          |
| dp                  | y              |            |          |
| hs                  | nn             |            |          |
| DISPLAY             |                |            |          |
| sp                  | -1509.4        |            |          |
| wp                  | 7999.8         |            |          |
| vs                  | 162            |            |          |
| sc                  | 0              |            |          |
| wc                  | 250            |            |          |
| hzmm                | 32.00          |            |          |
| is                  | 33.57          |            |          |
| rfl                 | 5135.5         |            |          |
| rfp                 | 3625.9         |            |          |
| th                  | 7              |            |          |
| ins                 | 100.000        |            |          |
| nm                  | ph             |            |          |

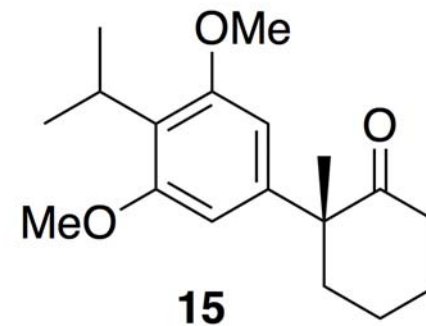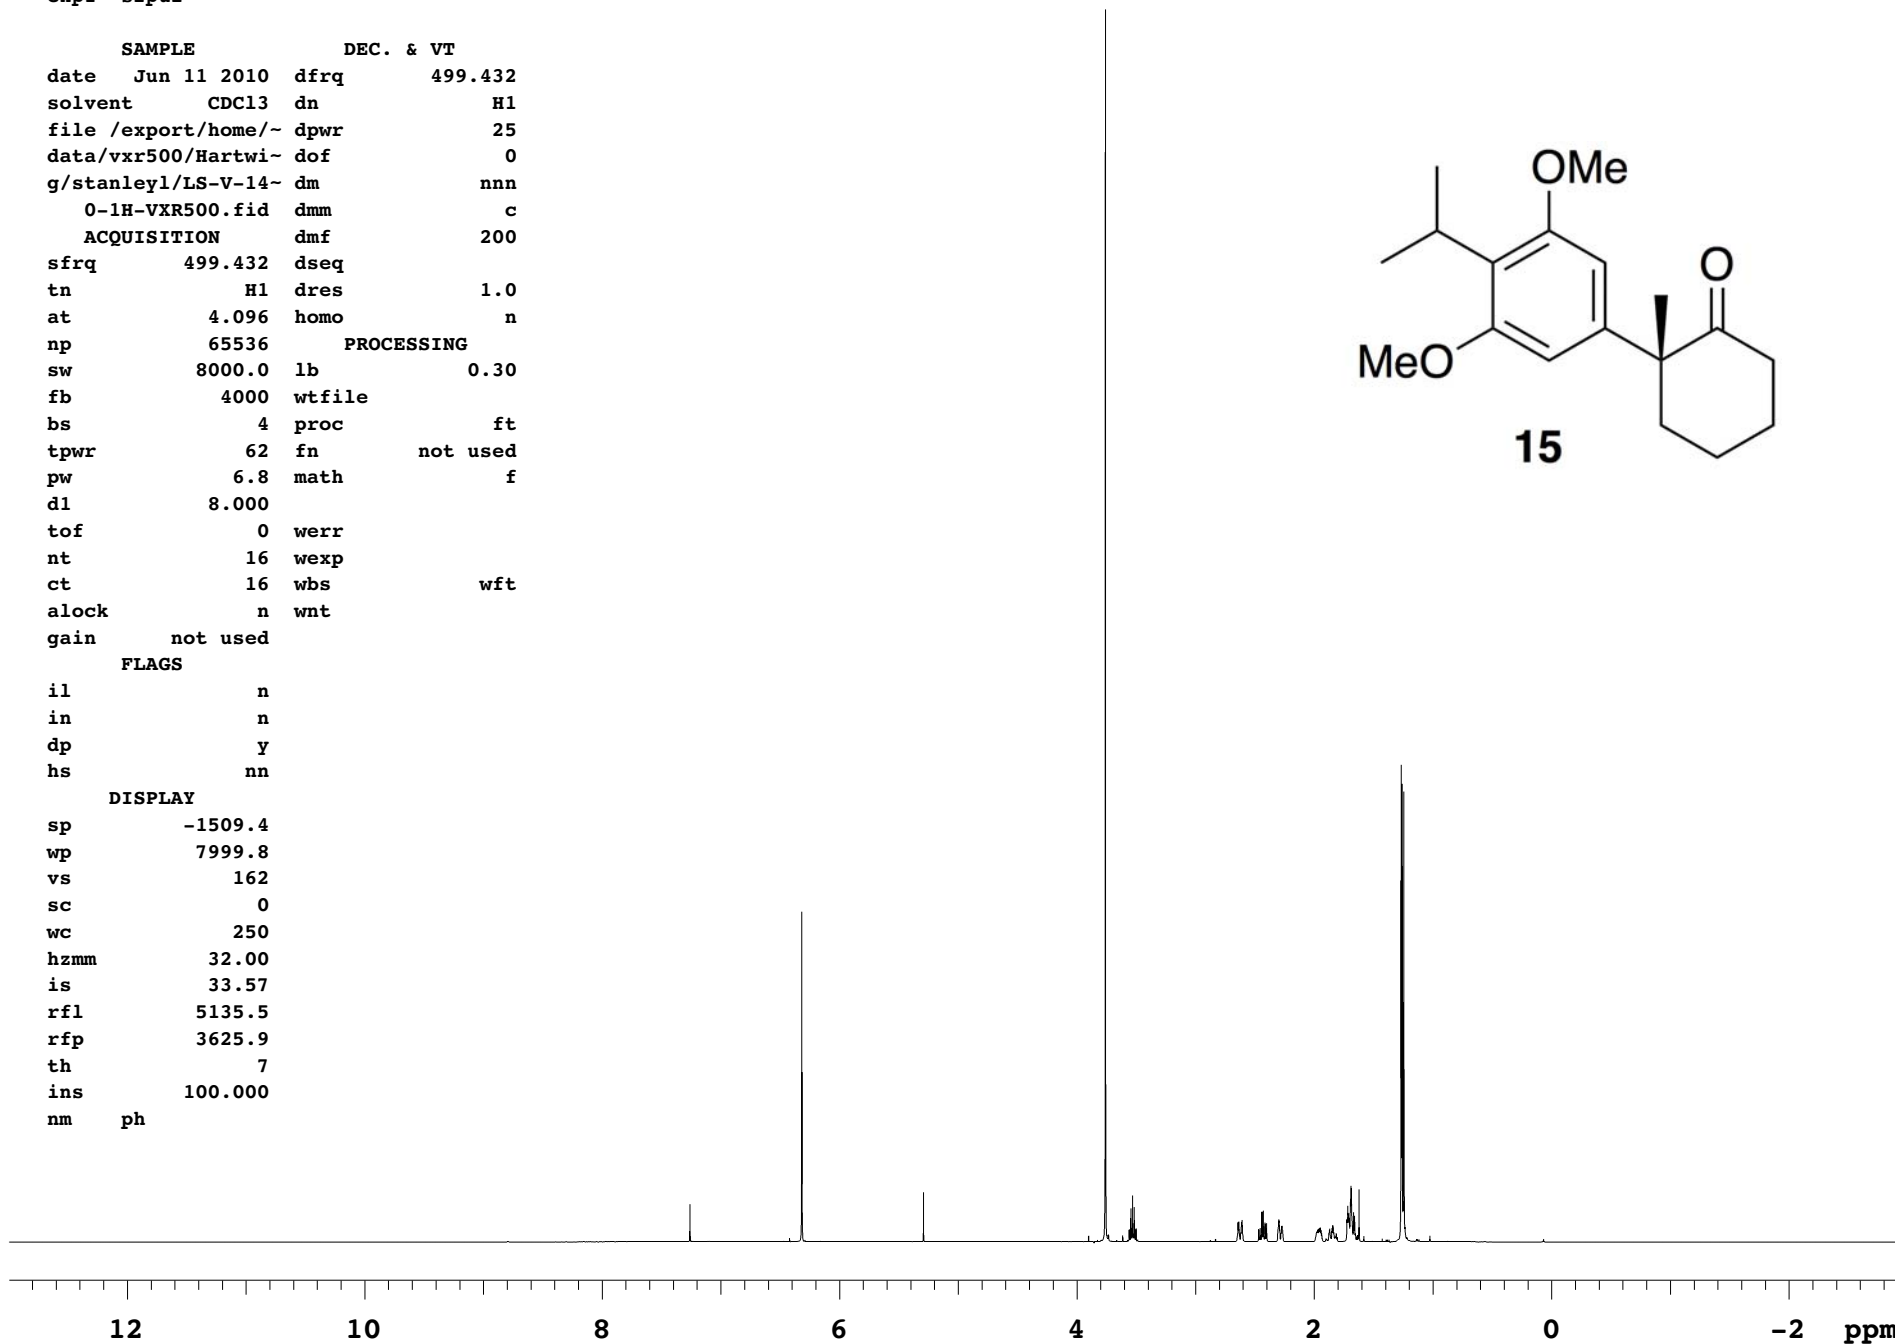

LS-V-140-13C-VXR500

exp1 s2pul

| SAMPLE              |                | DEC. & VT  |          |
|---------------------|----------------|------------|----------|
| date                | Jun 11 2010    | dfrq       | 499.432  |
| solvent             | CDC13          | dn         | H1       |
| file                | /export/home/~ | dpwr       | 49       |
| data/vxr500/Hartwi~ |                | dof        | -827.0   |
| g/stanley1/LS-V-14~ |                | dm         | YYY      |
| 0-13C-VXR500.fid    |                | dmm        | w        |
| ACQUISITION         |                | dmf        | 22222    |
| sfrq                | 125.596        | dseq       |          |
| tn                  | C13            | dres       | 1.0      |
| at                  | 1.024          | homo       | n        |
| np                  | 65536          | PROCESSING |          |
| sw                  | 32000.0        | lb         | 1.00     |
| fb                  | 18000          | wtfile     |          |
| bs                  | 16             | proc       | ft       |
| ss                  | 1              | fn         | not used |
| tpwr                | 63             | math       | f        |
| pw                  | 4.2            |            |          |
| d1                  | 1.000          | werr       |          |
| tof                 | 1880.0         | wexp       |          |
| nt                  | 2000           | wbs        | wft      |
| ct                  | 228            | wnt        |          |
| alock               | n              |            |          |
| gain                | not used       |            |          |
| FLAGS               |                |            |          |
| il                  | n              |            |          |
| in                  | n              |            |          |
| dp                  | y              |            |          |
| hs                  | nn             |            |          |
| DISPLAY             |                |            |          |
| sp                  | -2191.0        |            |          |
| wp                  | 31999.0        |            |          |
| vs                  | 162            |            |          |
| sc                  | 0              |            |          |
| wc                  | 250            |            |          |
| hzmm                | 128.00         |            |          |
| is                  | 500.00         |            |          |
| rfl                 | 11890.6        |            |          |
| rfp                 | 9698.7         |            |          |
| th                  | 13             |            |          |
| ins                 | 100.000        |            |          |
| nm                  | ph             |            |          |

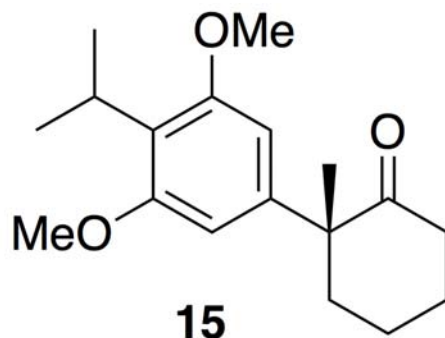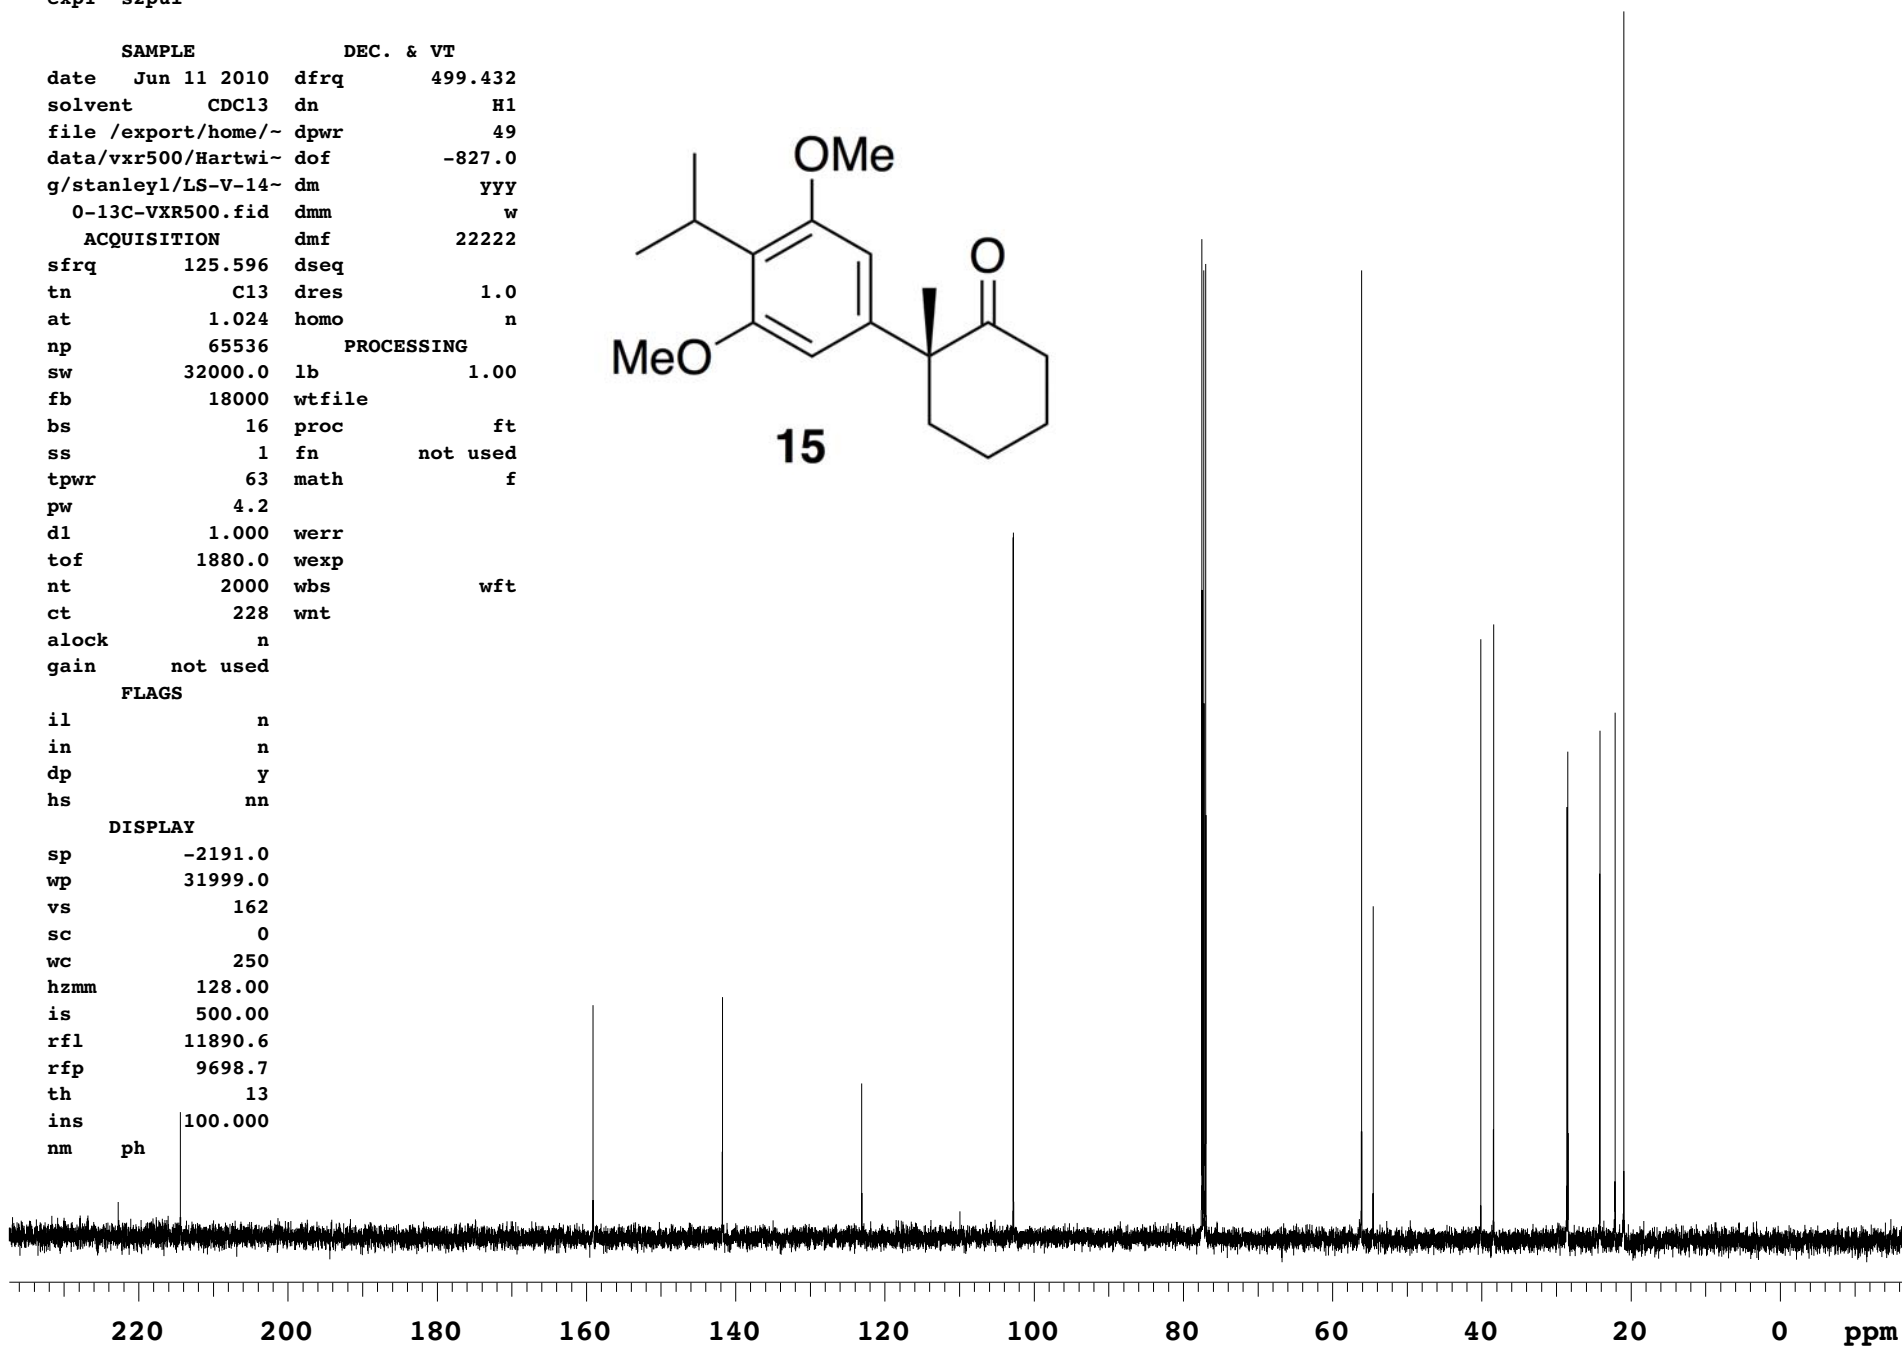

LS-V-152-1H-U500

exp2 s2pul

| SAMPLE              |                | DEC. & VT  |          |
|---------------------|----------------|------------|----------|
| date                | Jul 28 2010    | dfrq       | 499.693  |
| solvent             | CDC13          | dn         | H1       |
| file                | /export/home/~ | dpwr       | 20       |
| data/Hartwig/stanl~ |                | dof        | 0        |
| eyl/LS-V-152-1H-U5~ |                | dm         | nnn      |
| 00.fid              |                | dmm        | c        |
| ACQUISITION         |                | dmf        | 200      |
| sfrq                | 499.693        | dseq       |          |
| tn                  | H1             | dres       | 1.0      |
| at                  | 4.665          | homo       | n        |
| np                  | 65536          | DEC2       |          |
| sw                  | 7024.9         | dfrq2      | 0        |
| fb                  | 4000           | dn2        |          |
| bs                  | 4              | dpwr2      | 1        |
| tpwr                | 63             | dof2       | 0        |
| pw                  | 6.5            | dm2        | n        |
| d1                  | 10.000         | dmm2       | c        |
| tof                 | 2.0            | dmf2       | 200      |
| nt                  | 12             | dseq2      |          |
| ct                  | 12             | dres2      | 1.0      |
| alock               | n              | homo2      | n        |
| gain                | not used       | PROCESSING |          |
| FLAGS               |                | lb         | 0.30     |
| il                  | n              | wtfile     |          |
| in                  | n              | proc       | ft       |
| dp                  | y              | fn         | not used |
| hs                  | nn             | math       | f        |
| DISPLAY             |                |            |          |
| sp                  | -1012.2        | werr       |          |
| wp                  | 7024.7         | wexp       |          |
| vs                  | 43             | wbs        | wft      |
| sc                  | 0              | wnt        |          |
| wc                  | 250            |            |          |
| hzmm                | 28.10          |            |          |
| is                  | 33.57          |            |          |
| rfl                 | 4640.1         |            |          |
| rfp                 | 3627.8         |            |          |
| th                  | 7              |            |          |
| ins                 | 100.000        |            |          |
| ai                  | ph             |            |          |

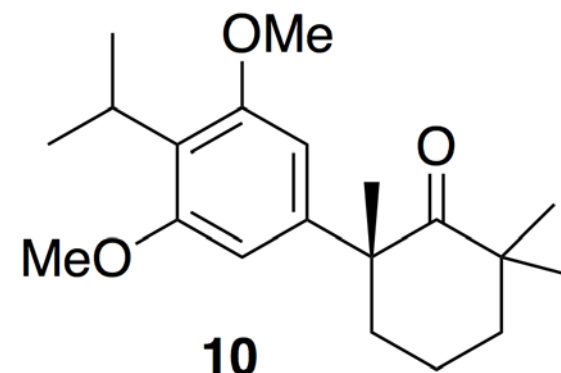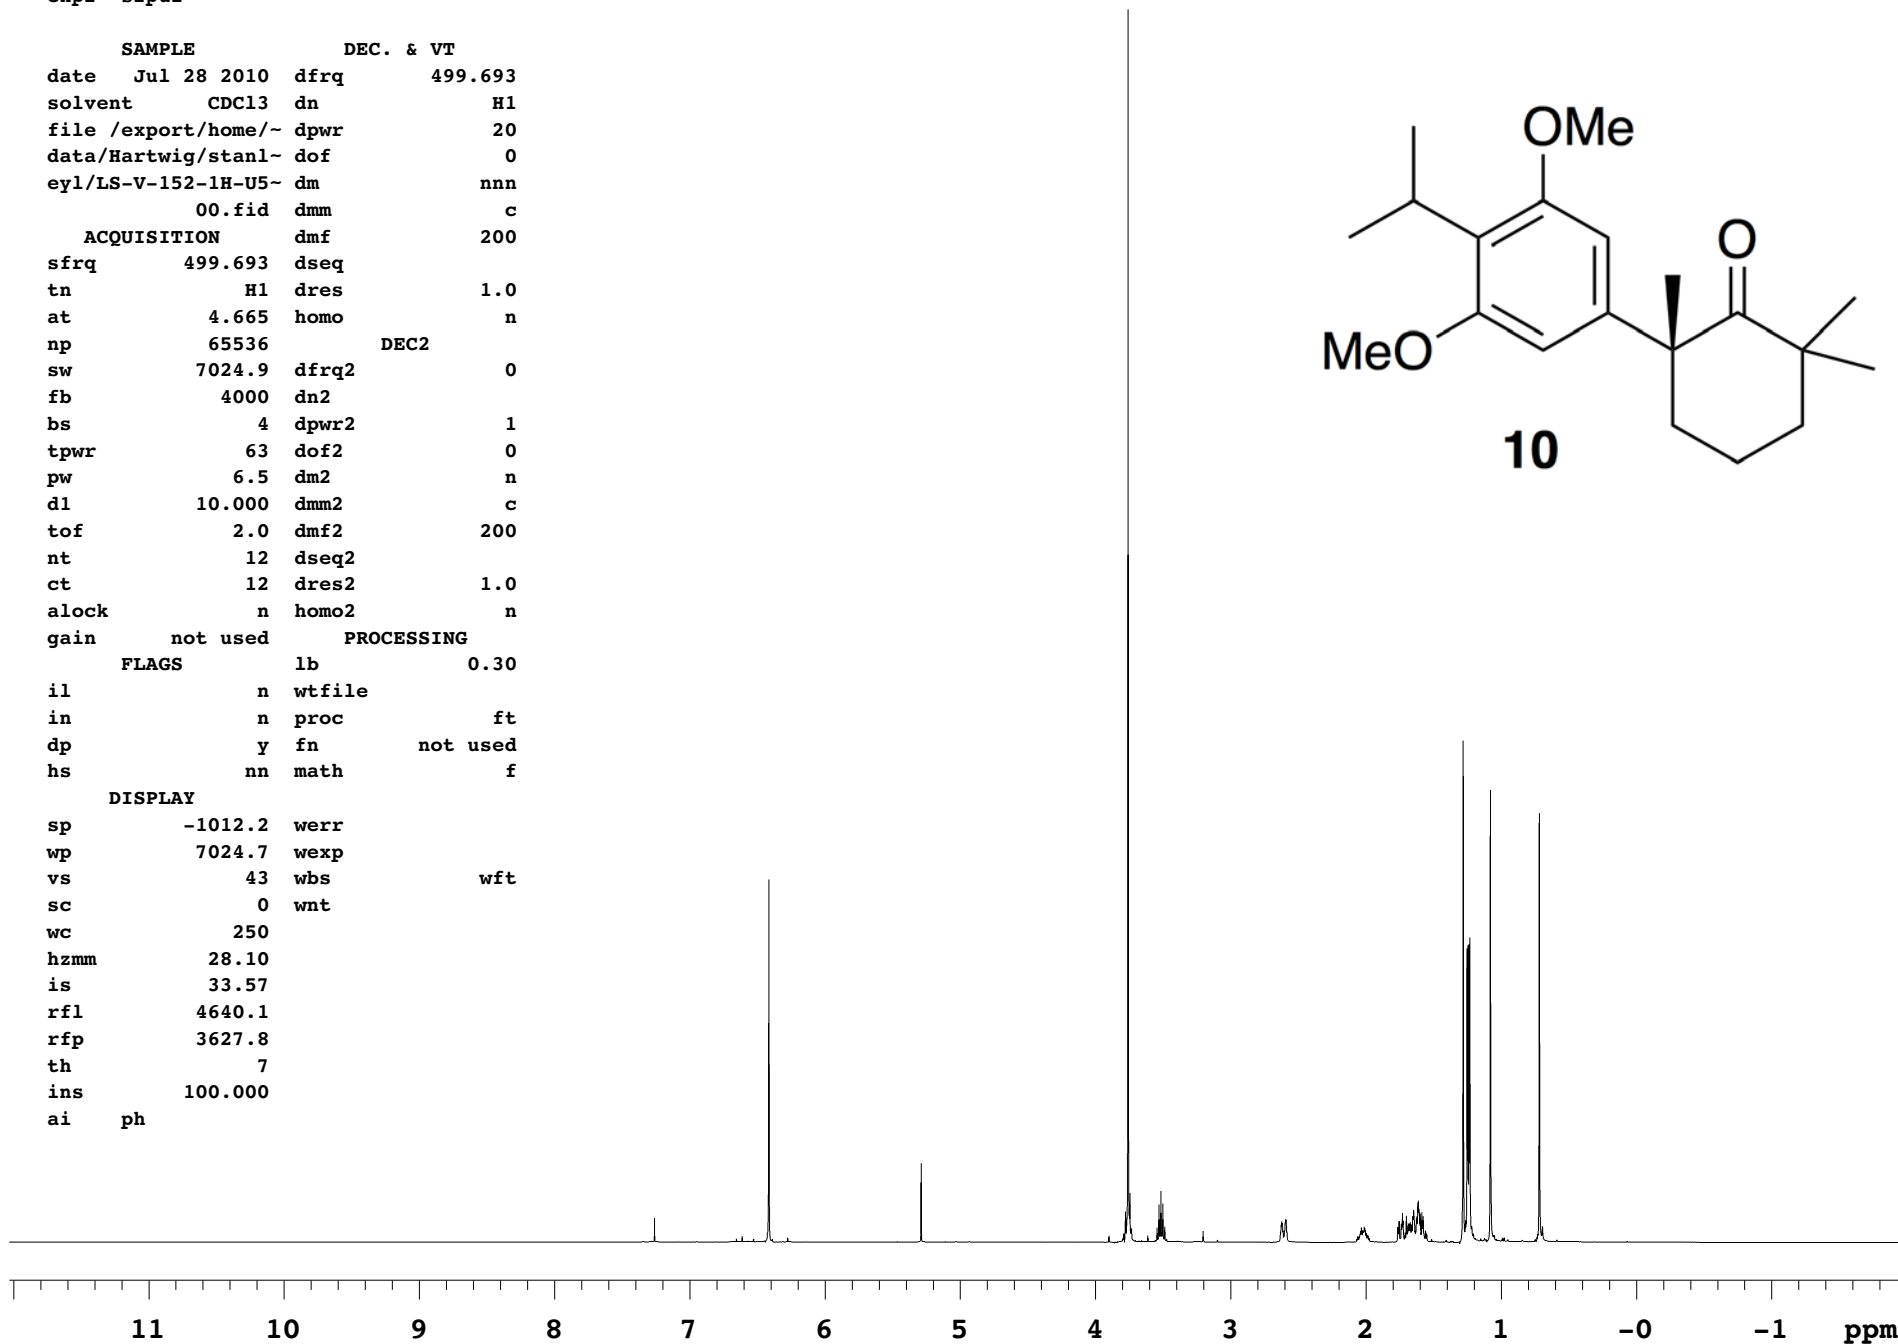

LS-V-152-13C-U500

exp2 s2pul

| SAMPLE              |                | DEC. & VT  |          |
|---------------------|----------------|------------|----------|
| date                | Jul 28 2010    | dfrq       | 499.692  |
| solvent             | CDC13          | dn         | H1       |
| file                | /export/home/~ | dpwr       | 44       |
| data/Hartwig/stanl~ |                | dof        | -827.6   |
| eyl/LS-V-152-13C-U~ |                | dm         | YYY      |
| 500.fid             |                | dmm        | w        |
| ACQUISITION         |                | dmf        | 19608    |
| sfrq                | 125.661        | dseq       |          |
| tn                  | C13            | dres       | 90.0     |
| at                  | 1.086          | homo       | n        |
| np                  | 65536          | DEC2       |          |
| sw                  | 30165.9        | dfrq2      | 0        |
| fb                  | 17000          | dn2        |          |
| bs                  | 16             | dpwr2      | 1        |
| ss                  | 1              | dof2       | 0        |
| tpwr                | 54             | dm2        | n        |
| pw                  | 6.0            | dmm2       | c        |
| d1                  | 1.000          | dmf2       | 10000    |
| tof                 | 1884.7         | dseq2      |          |
| nt                  | 2000           | dres2      | 1.0      |
| ct                  | 223            | homo2      | n        |
| alock               |                | PROCESSING |          |
| gain                | not used       | lb         | 1.00     |
| FLAGS               |                | wtfile     |          |
| il                  | n              | proc       | ft       |
| in                  | n              | fn         | not used |
| dp                  | y              | math       | f        |
| hs                  | nn             |            |          |
| DISPLAY             |                | werr       |          |
| sp                  | -1263.3        | wexp       |          |
| wp                  | 30165.0        | wbs        | wft      |
| vs                  | 162            | wnt        |          |
| sc                  | 0              |            |          |
| wc                  | 250            |            |          |
| hzmm                | 120.66         |            |          |
| is                  | 500.00         |            |          |
| rfl                 | 10967.9        |            |          |
| rfp                 | 9703.7         |            |          |
| th                  | 8              |            |          |
| ins                 | 100.000        |            |          |
| nm                  | ph             |            |          |

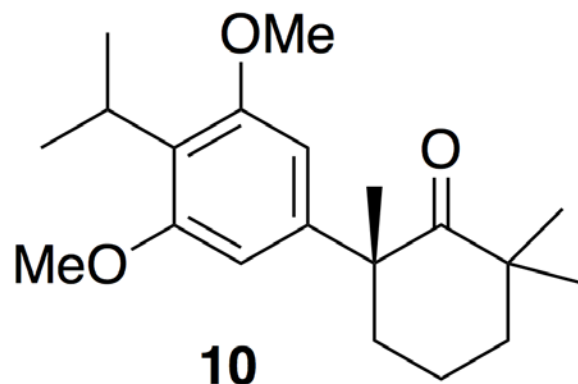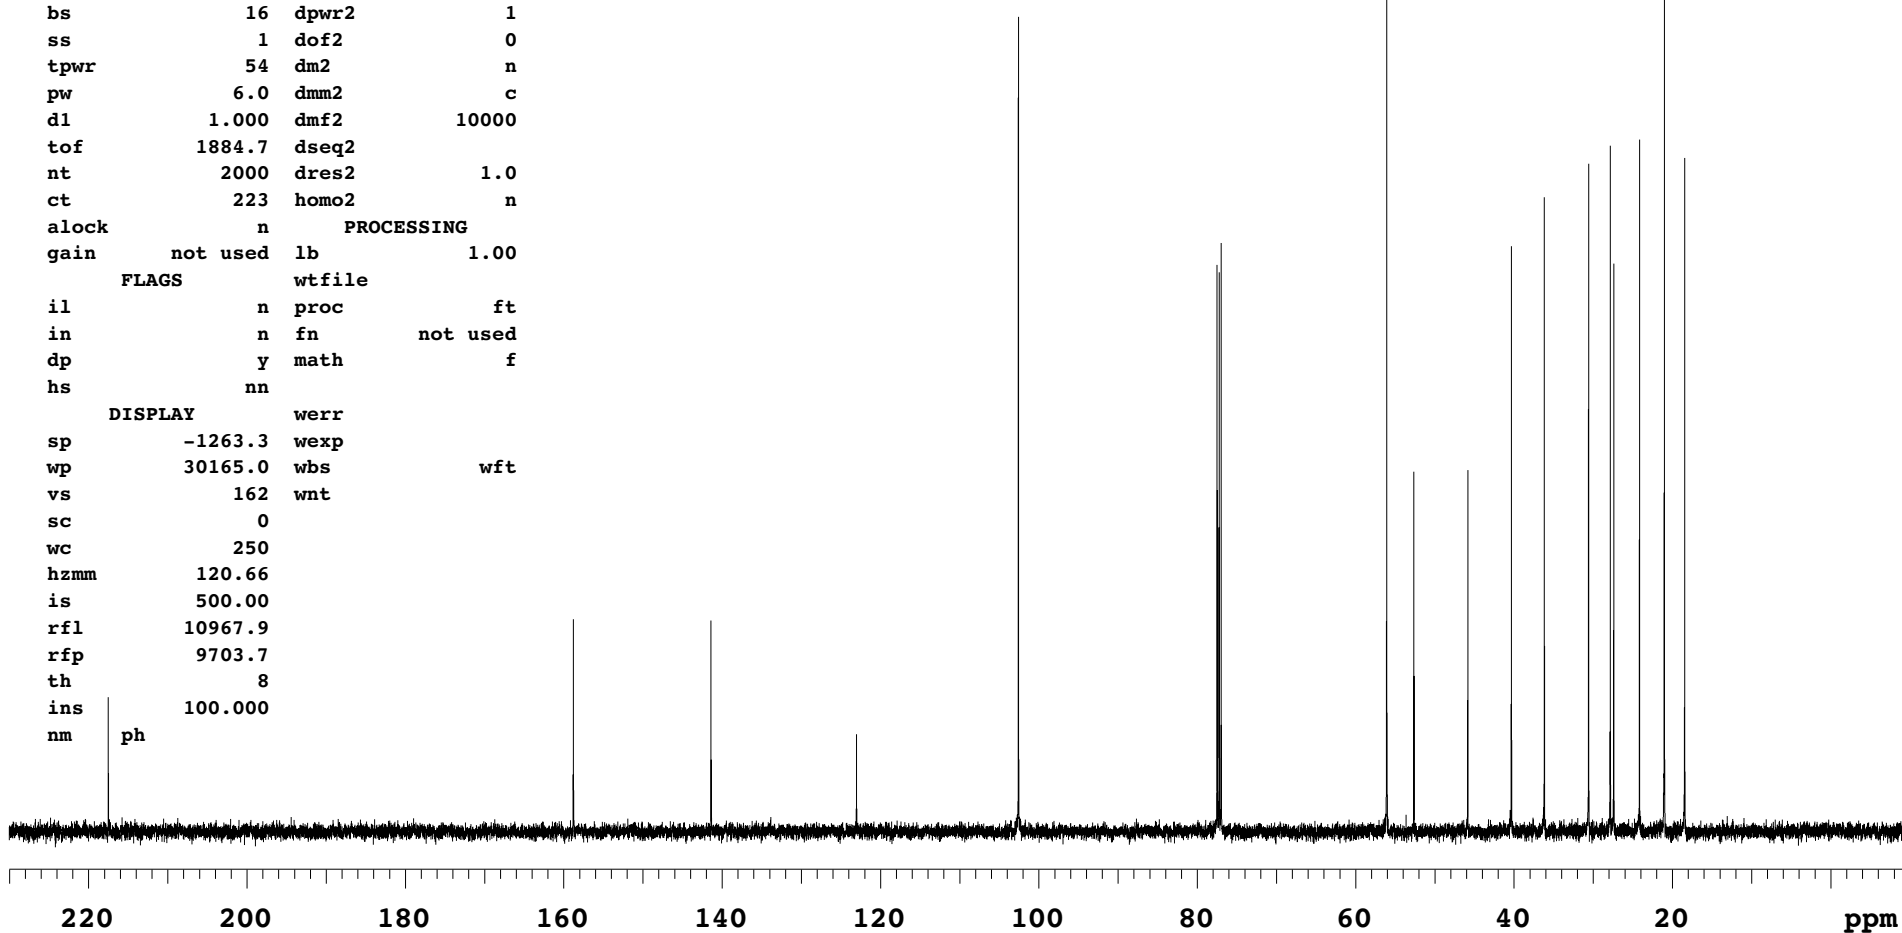

## LS-Synthesis-epoxide-1H-U500

exp2 s2pul

| SAMPLE              |                | DEC. & VT  |          |
|---------------------|----------------|------------|----------|
| date                | Oct 26 2010    | dfrq       | 499.693  |
| solvent             | CDC13          | dn         | H1       |
| file                | /export/home/~ | dpwr       | 20       |
| data/Hartwig/stanl~ |                | dof        | 0        |
| eyl/LS-Synthesis-e- |                | dm         | nnn      |
| poxide-1H-U500.fid  |                | dmm        | c        |
| ACQUISITION         |                | dmf        | 200      |
| sfrq                | 499.693        | dseq       |          |
| tn                  | H1             | dres       | 1.0      |
| at                  | 10.000         | homo       | n        |
| np                  | 140498         | DEC2       |          |
| sw                  | 7024.9         | dfrq2      | 0        |
| fb                  | 4000           | dn2        |          |
| bs                  | 4              | dpwr2      | 1        |
| tpwr                | 63             | dof2       | 0        |
| pw                  | 6.5            | dm2        | n        |
| d1                  | 0              | dmm2       | c        |
| tof                 | 2.0            | dmf2       | 200      |
| nt                  | 16             | dseq2      |          |
| ct                  | 16             | dres2      | 1.0      |
| alock               | n              | homo2      | n        |
| gain                | not used       | PROCESSING |          |
| FLAGS               |                | lb         | 0.30     |
| il                  | n              | wtfile     |          |
| in                  | n              | proc       | ft       |
| dp                  | y              | fn         | not used |
| hs                  | nn             | math       | f        |
| DISPLAY             |                |            |          |
| sp                  | -1012.5        | werr       |          |
| wp                  | 7024.9         | wexp       |          |
| vs                  | 39             | wbs        | wft      |
| sc                  | 0              | wnt        |          |
| wc                  | 250            |            |          |
| hzmm                | 28.10          |            |          |
| is                  | 33.57          |            |          |
| rfl                 | 4640.3         |            |          |
| rfp                 | 3627.8         |            |          |
| th                  | 7              |            |          |
| ins                 | 100.000        |            |          |
| ai                  | ph             |            |          |

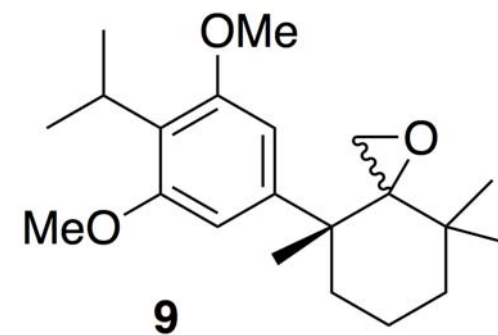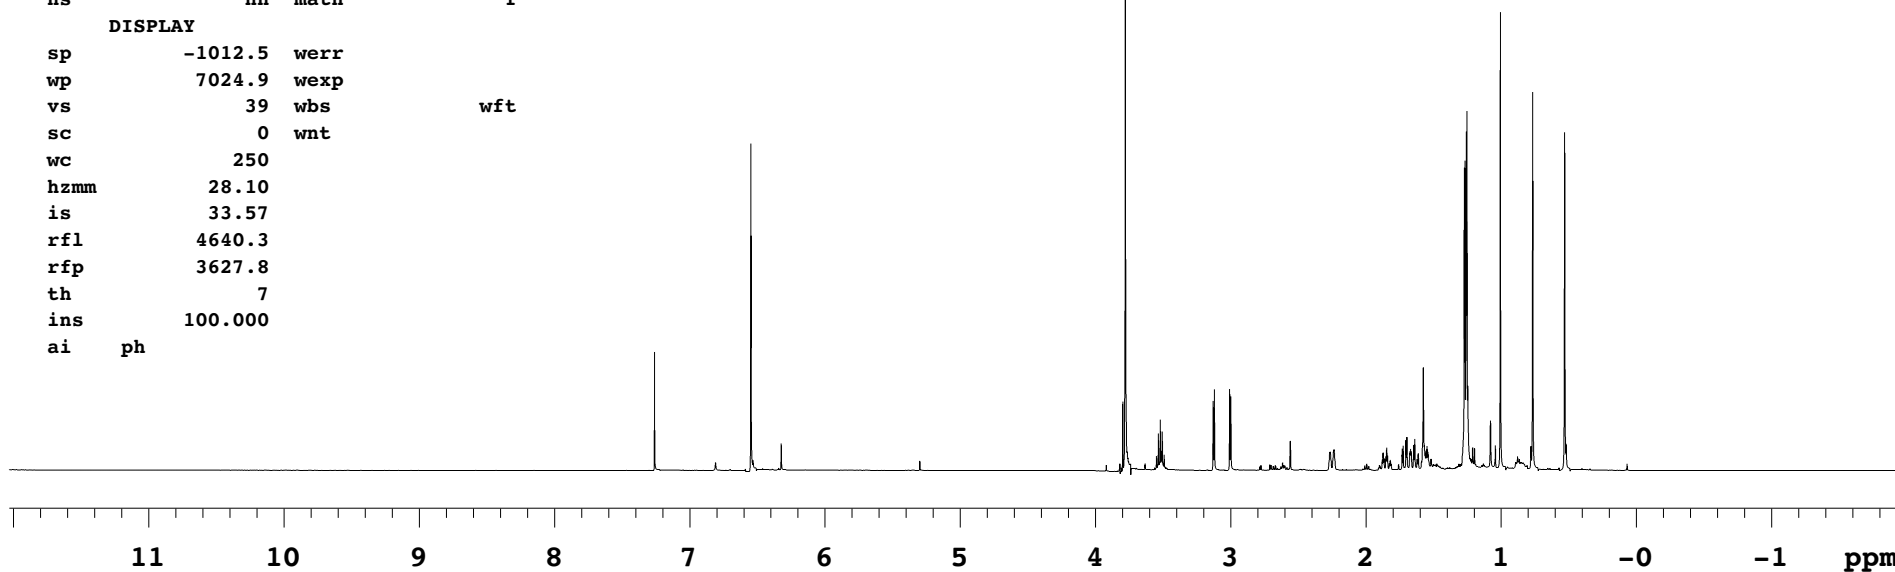

## LS-Synthesis-epoxide-13C-U500

exp2 s2pul

| SAMPLE              |                | DEC. & VT |         |
|---------------------|----------------|-----------|---------|
| date                | Oct 26 2010    | dfrq      | 499.692 |
| solvent             | CDC13          | dn        | H1      |
| file                | /export/home/~ | dpwr      | 44      |
| data/Hartwig/stanl- |                | dof       | -827.6  |
| eyl/LS-Synthesis-e- |                | dm        | YYY     |
| poxide-13C-U500.fi- |                | dmm       | w       |
|                     | d              | dmf       | 19608   |

| ACQUISITION |         | dseq  |       |
|-------------|---------|-------|-------|
| sfrq        | 125.661 | dres  | 90.0  |
| tn          | C13     | homo  | n     |
| at          | 8.000   | DEC2  |       |
| np          | 482654  | dfrq2 | 0     |
| sw          | 30165.9 | dn2   |       |
| fb          | 17000   | dpwr2 | 1     |
| bs          | 16      | dof2  | 0     |
| ss          | 1       | dm2   | n     |
| tpwr        | 54      | dmm2  | c     |
| pw          | 6.0     | dmf2  | 10000 |
| d1          | 1.000   | dseq2 |       |
| tof         | 1884.7  | dres2 | 1.0   |
| nt          | 2000    | homo2 | n     |

| ct    |          | PROCESSING |          |
|-------|----------|------------|----------|
| alock | n        | lb         | 1.00     |
| gain  | not used | wtfile     |          |
| FLAGS |          | proc       | ft       |
| il    | n        | fn         | not used |
| in    | n        | math       | f        |

| dp      |         | hs   |      |
|---------|---------|------|------|
| dp      | y       | nn   | werr |
| DISPLAY |         | wexp |      |
| sp      | -1262.0 | wbs  | wft  |
| wp      | 30165.8 | wnt  |      |

|      |         |
|------|---------|
| vs   | 400     |
| sc   | 0       |
| wc   | 250     |
| hzmm | 120.66  |
| is   | 500.00  |
| rfl  | 10965.8 |
| rfp  | 9703.7  |
| th   | 3       |
| ins  | 100.000 |
| nm   | ph      |

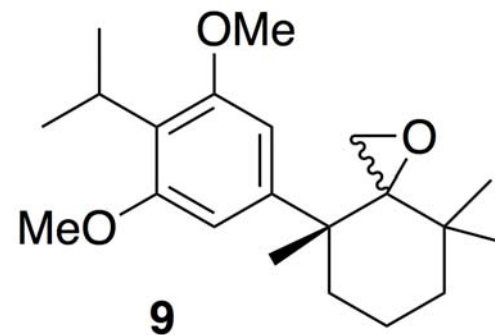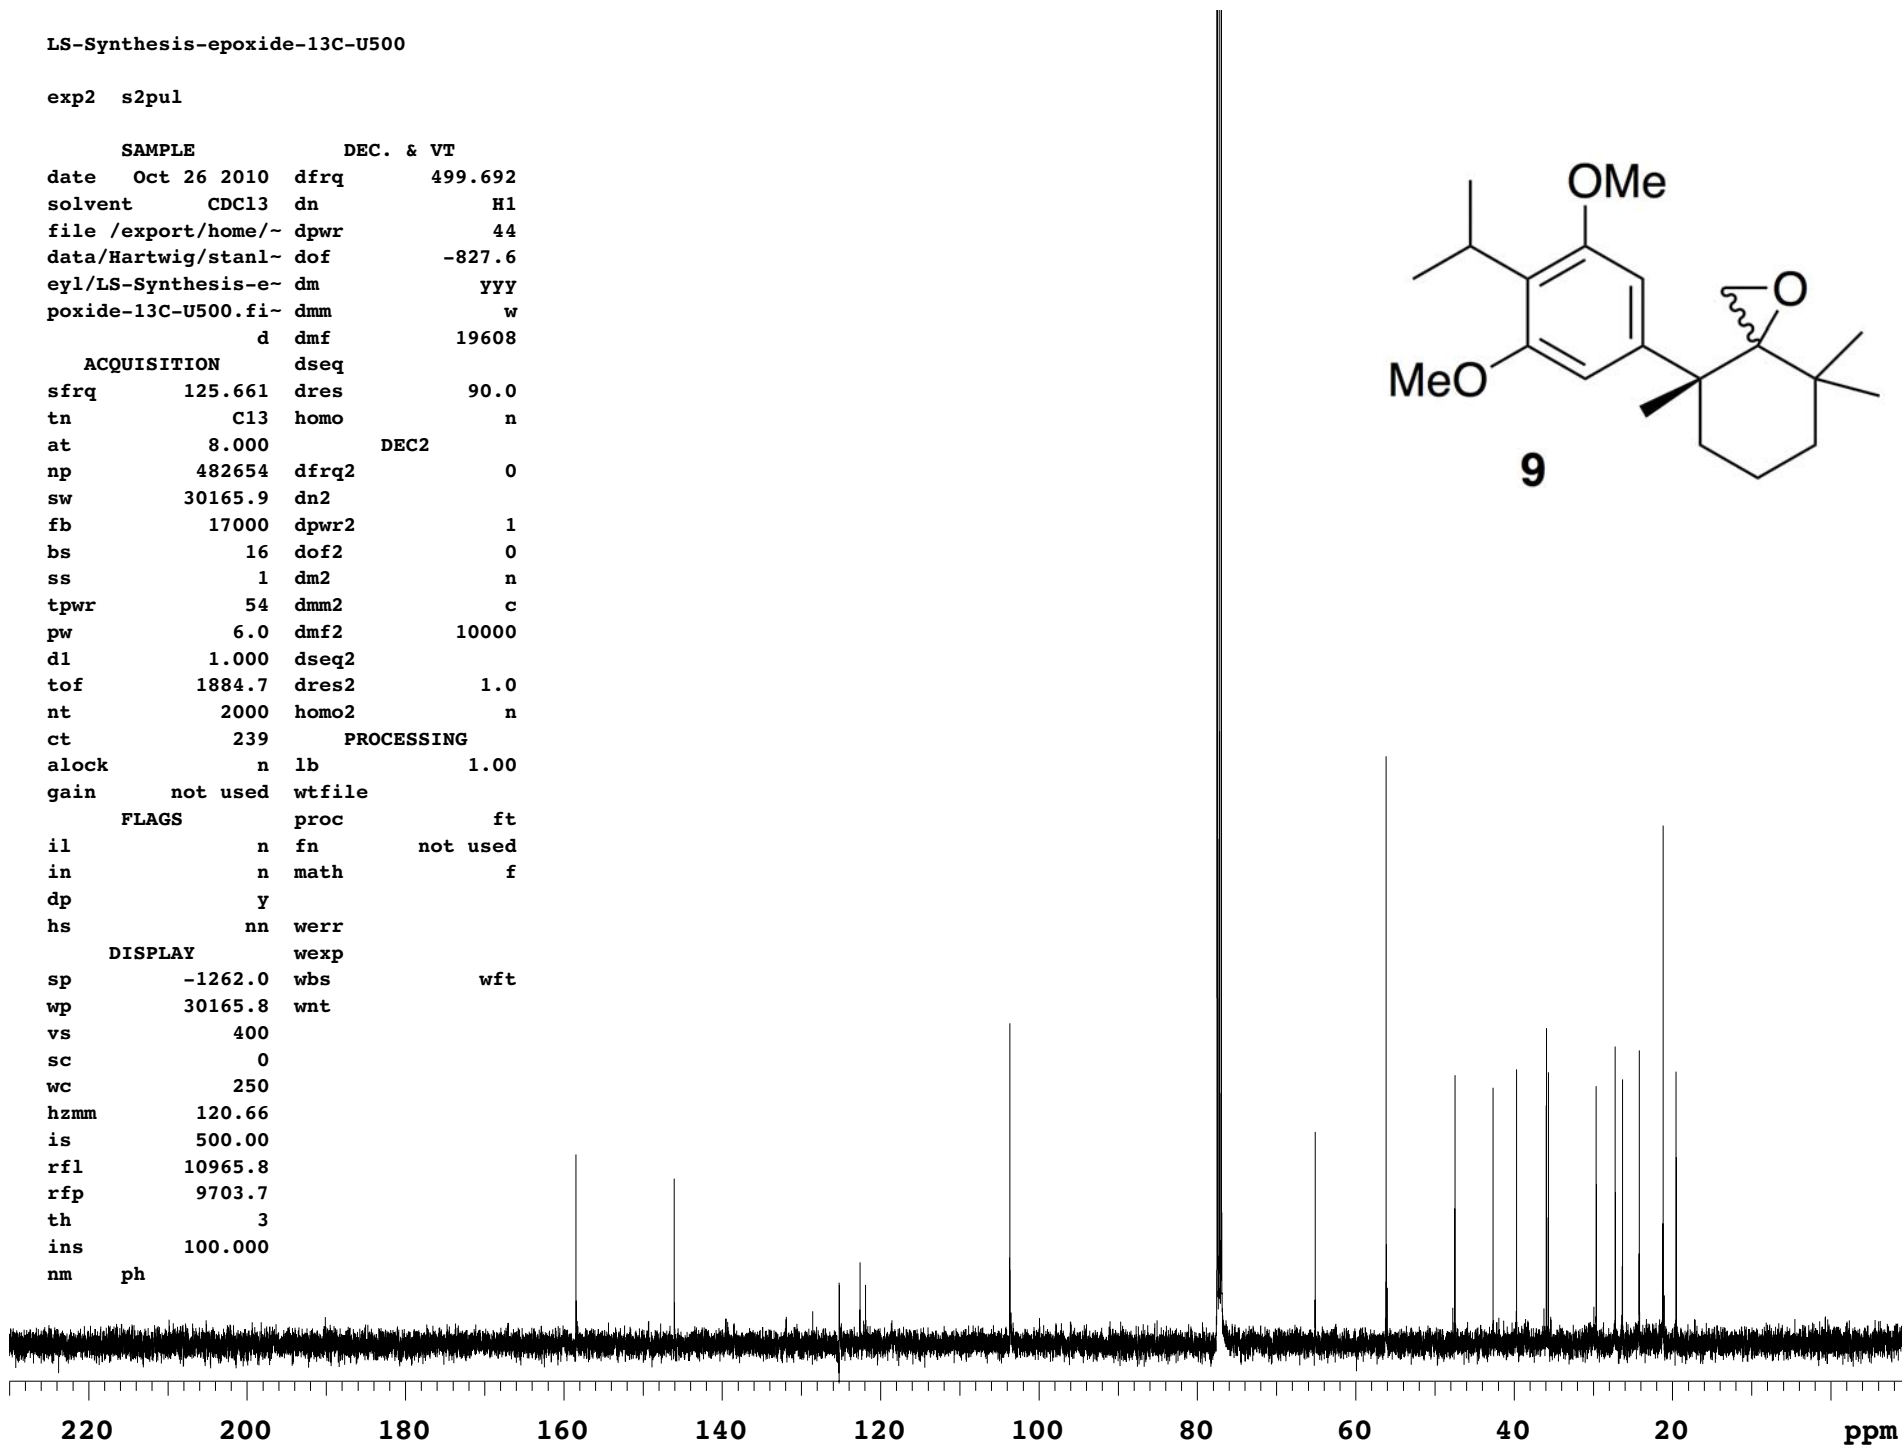

LS-VI-27-1H-U500

expl s2pul

| SAMPLE              |                | DEC. & VT  |          |
|---------------------|----------------|------------|----------|
| date                | Oct 15 2010    | dfrq       | 499.693  |
| solvent             | CDC13          | dn         | H1       |
| file                | /export/home/~ | dpwr       | 20       |
| data/u500/Hartwig/~ |                | dof        | 0        |
| stanley1/LS-VI-27-~ |                | dm         | nnn      |
| 1H-U500.fid         |                | dmm        | c        |
| ACQUISITION         |                | dmf        | 200      |
| sfrq                | 499.693        | dseq       |          |
| tn                  | H1             | dres       | 1.0      |
| at                  | 10.000         | homo       | n        |
| np                  | 140498         | PROCESSING |          |
| sw                  | 7024.9         | lb         | 0.30     |
| fb                  | 4000           | wtfile     |          |
| bs                  | 4              | proc       | ft       |
| tpwr                | 63             | fn         | not used |
| pw                  | 6.5            | math       | f        |
| d1                  | 0              |            |          |
| tof                 | 2.0            | werr       |          |
| nt                  | 16             | wexp       |          |
| ct                  | 16             | wbs        | wft      |
| alock               | n              | wnt        |          |
| gain                | not used       |            |          |
| FLAGS               |                |            |          |
| il                  | n              |            |          |
| in                  | n              |            |          |
| dp                  | y              |            |          |
| hs                  | nn             |            |          |
| DISPLAY             |                |            |          |
| sp                  | -1012.1        |            |          |
| wp                  | 7024.9         |            |          |
| vs                  | 96             |            |          |
| sc                  | 0              |            |          |
| wc                  | 250            |            |          |
| hzmm                | 28.10          |            |          |
| is                  | 33.57          |            |          |
| rfl                 | 4639.9         |            |          |
| rfp                 | 3627.8         |            |          |
| th                  | 7              |            |          |
| ins                 | 100.000        |            |          |
| ai                  | ph             |            |          |

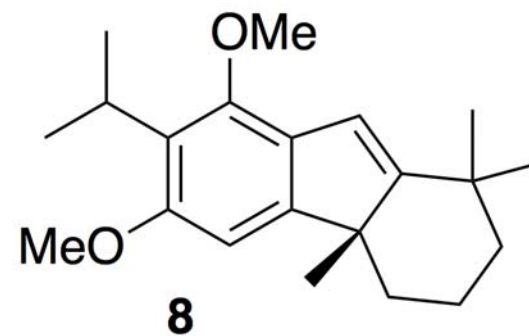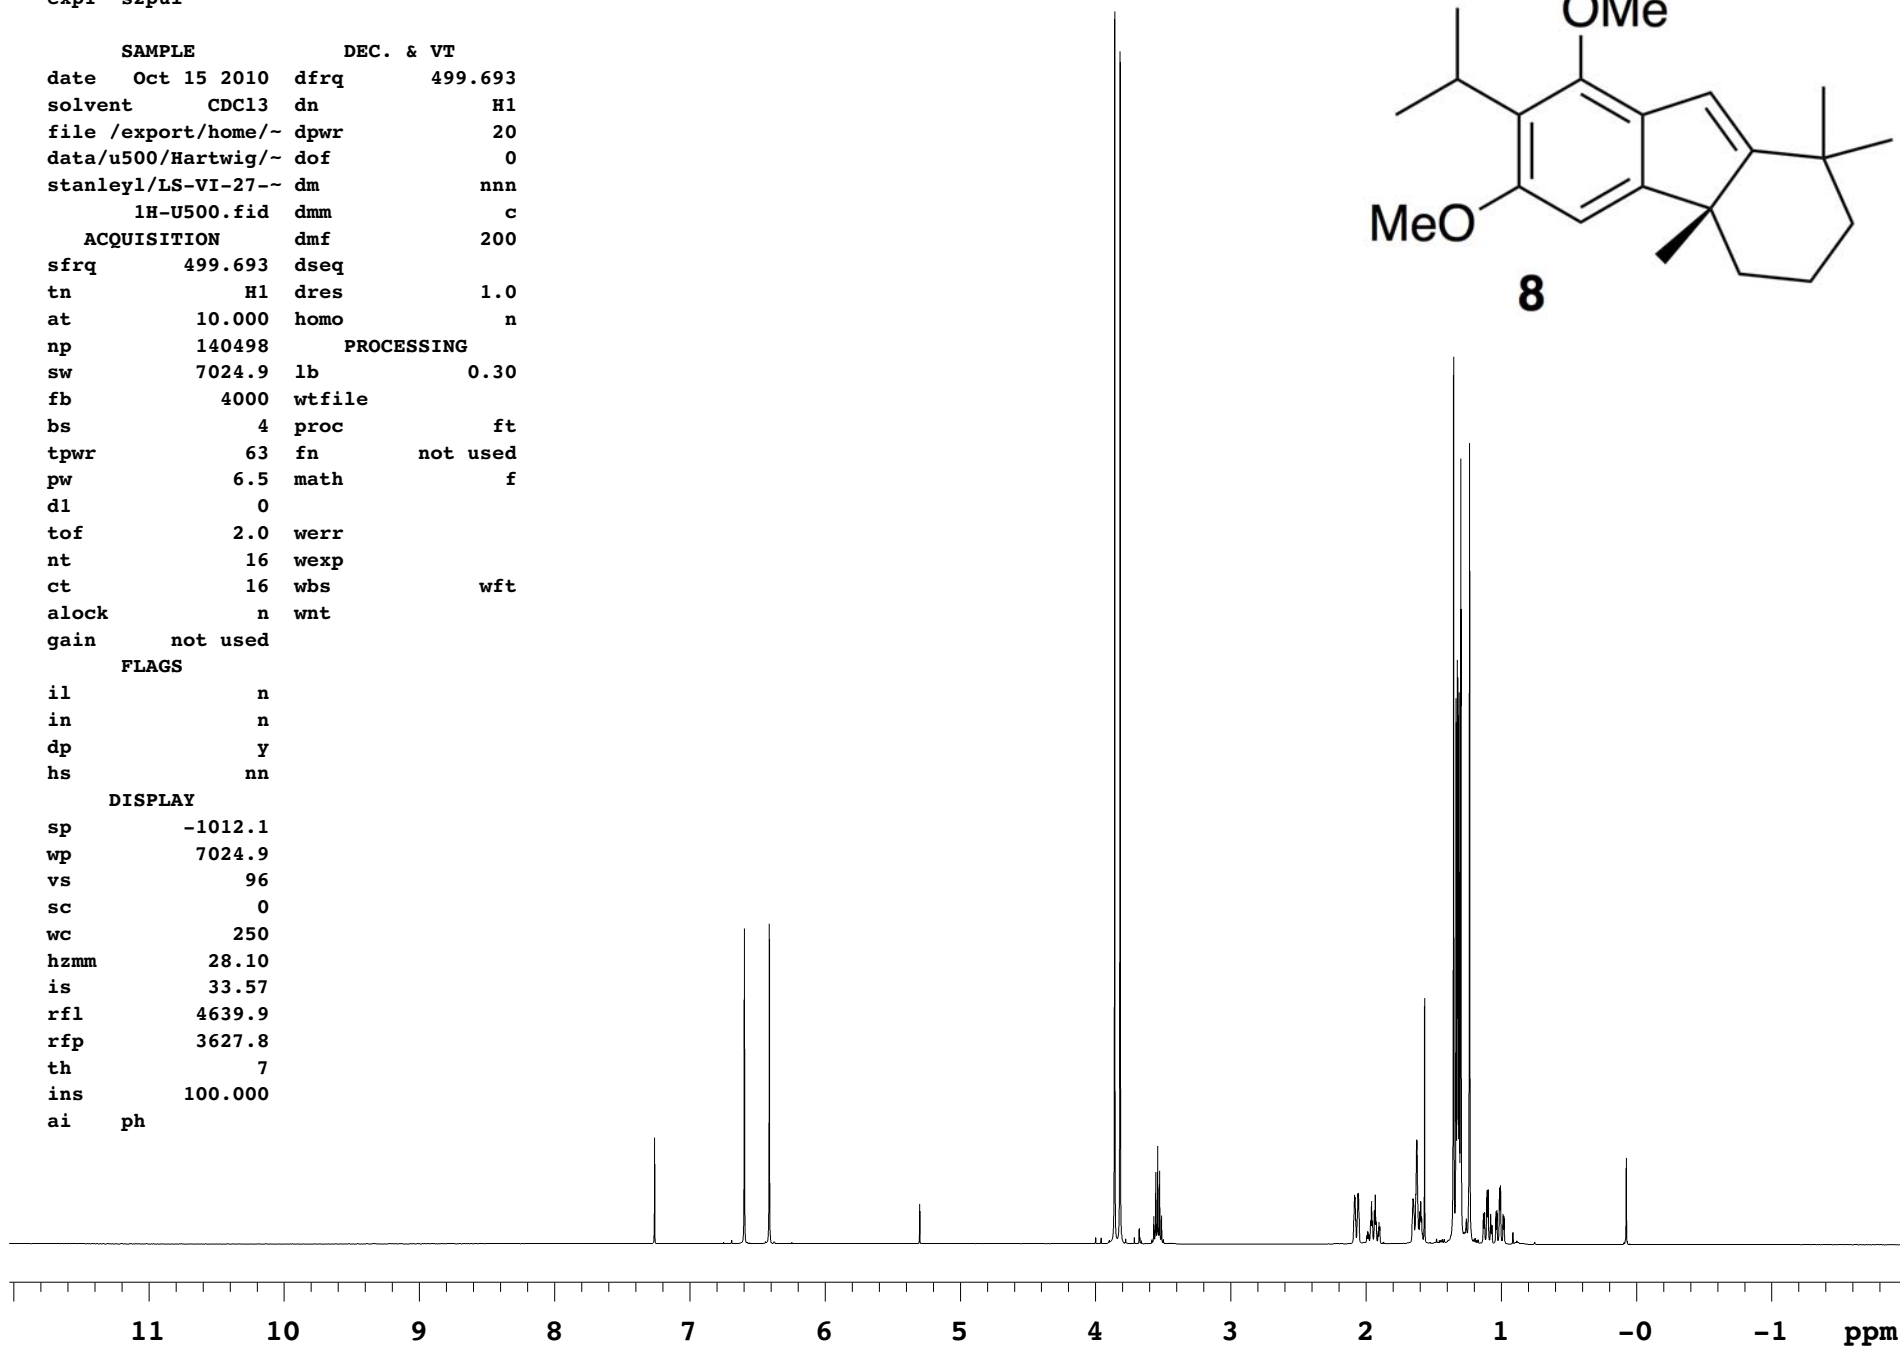

LS-VI-27-13C-U500

exp2 s2pul

| SAMPLE              |                | DEC. & VT |            |
|---------------------|----------------|-----------|------------|
| date                | Oct 15 2010    | dfrq      | 499.692    |
| solvent             | CDC13          | dn        | H1         |
| file                | /export/home/~ | dpwr      | 44         |
| data/Hartwig/stanl~ |                | dof       | -827.6     |
| eyl/LS-VI-27-13C-U~ |                | dm        | YYY        |
| 500.fid             |                | dmm       | w          |
| ACQUISITION         |                | dmf       | 19608      |
| sfrq                | 125.661        | dseq      |            |
| tn                  | C13            | dres      | 90.0       |
| at                  | 8.000          | homo      | n          |
| np                  | 482654         |           | DEC2       |
| sw                  | 30165.9        | dfrq2     | 0          |
| fb                  | 17000          | dn2       |            |
| bs                  | 16             | dpwr2     | 1          |
| ss                  | 1              | dof2      | 0          |
| tpwr                | 54             | dm2       | n          |
| pw                  | 6.0            | dmm2      | c          |
| d1                  | 1.000          | dmf2      | 10000      |
| tof                 | 1884.7         | dseq2     |            |
| nt                  | 2000           | dres2     | 1.0        |
| ct                  | 55             | homo2     | n          |
| alock               |                | n         | PROCESSING |
| gain                | not used       | lb        | 1.00       |
| FLAGS               |                | wtfile    |            |
| il                  | n              | proc      | ft         |
| in                  | n              | fn        | not used   |
| dp                  | y              | math      | f          |
| hs                  | nn             |           |            |
| DISPLAY             |                | werr      |            |
| sp                  | -1262.5        | wexp      |            |
| wp                  | 30165.8        | wbs       | wft        |
| vs                  | 162            | wnt       |            |
| sc                  | 0              |           |            |
| wc                  | 250            |           |            |
| hzmm                | 120.66         |           |            |
| is                  | 500.00         |           |            |
| rfl                 | 10966.3        |           |            |
| rfp                 | 9703.7         |           |            |
| th                  | 5              |           |            |
| ins                 | 100.000        |           |            |
| nm                  | ph             |           |            |

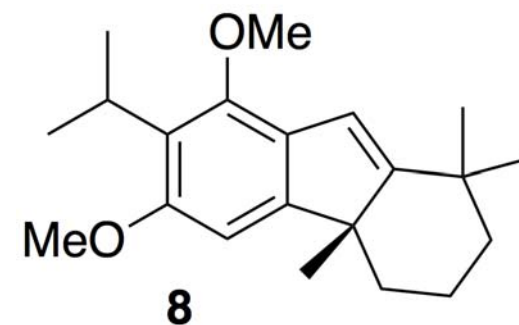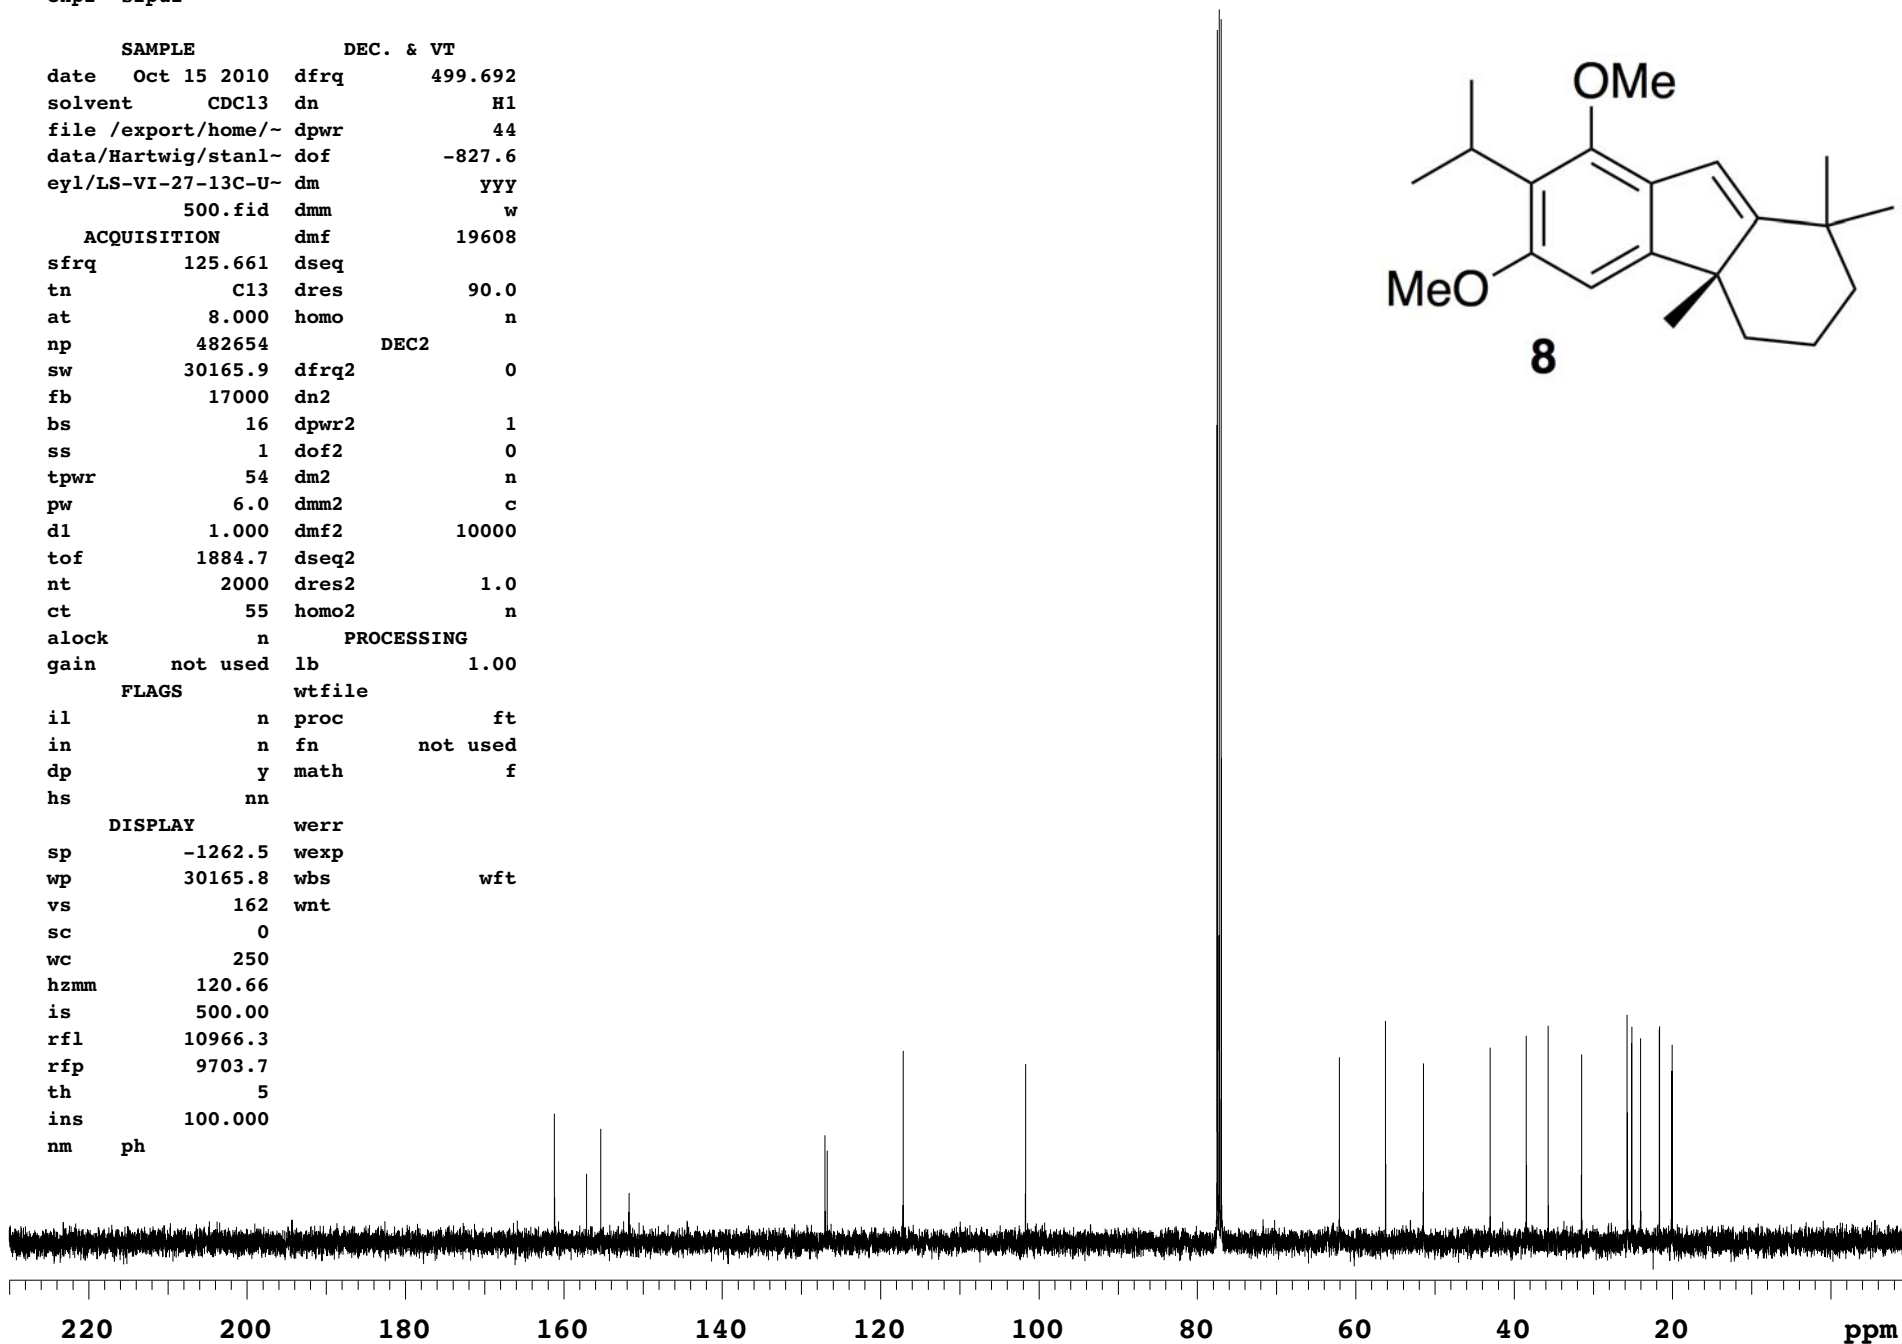

LS-VI-25-1H-VXR500

exp1 s2pul

| SAMPLE              |                | DEC. & VT  |          |
|---------------------|----------------|------------|----------|
| date                | Sep 22 2010    | dfrq       | 499.432  |
| solvent             | CDC13          | dn         | H1       |
| file                | /export/home/~ | dpwr       | 25       |
| data/vxr500/Hartwi~ |                | dof        | 0        |
| g/stanley1/LS-VI-2~ |                | dm         | nnn      |
| 5-1H-VXR500.fid     |                | dmm        | c        |
| ACQUISITION         |                | dmf        | 200      |
| sfrq                | 499.432        | dseq       |          |
| tn                  | H1             | dres       | 1.0      |
| at                  | 4.096          | homo       | n        |
| np                  | 65536          | PROCESSING |          |
| sw                  | 8000.0         | lb         | 0.30     |
| fb                  | 4000           | wtfile     |          |
| bs                  | 4              | proc       | ft       |
| tpwr                | 62             | fn         | not used |
| pw                  | 6.6            | math       | f        |
| d1                  | 10.000         |            |          |
| tof                 | 0              | werr       |          |
| nt                  | 16             | wexp       |          |
| ct                  | 16             | wbs        | wft      |
| alock               | n              | wnt        |          |
| gain                | not used       |            |          |
| FLAGS               |                |            |          |
| il                  | n              |            |          |
| in                  | n              |            |          |
| dp                  | y              |            |          |
| hs                  | nn             |            |          |
| DISPLAY             |                |            |          |
| sp                  | -1509.1        |            |          |
| wp                  | 7999.8         |            |          |
| vs                  | 162            |            |          |
| sc                  | 0              |            |          |
| wc                  | 250            |            |          |
| hzmm                | 32.00          |            |          |
| is                  | 33.57          |            |          |
| rfl                 | 5135.3         |            |          |
| rfp                 | 3625.9         |            |          |
| th                  | 7              |            |          |
| ins                 | 100.000        |            |          |
| nm                  | ph             |            |          |

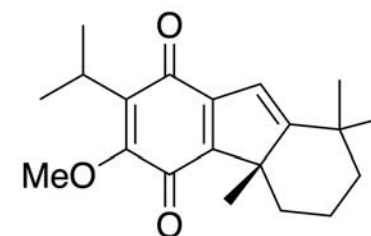

2 (-)-taiwaniaquinone H

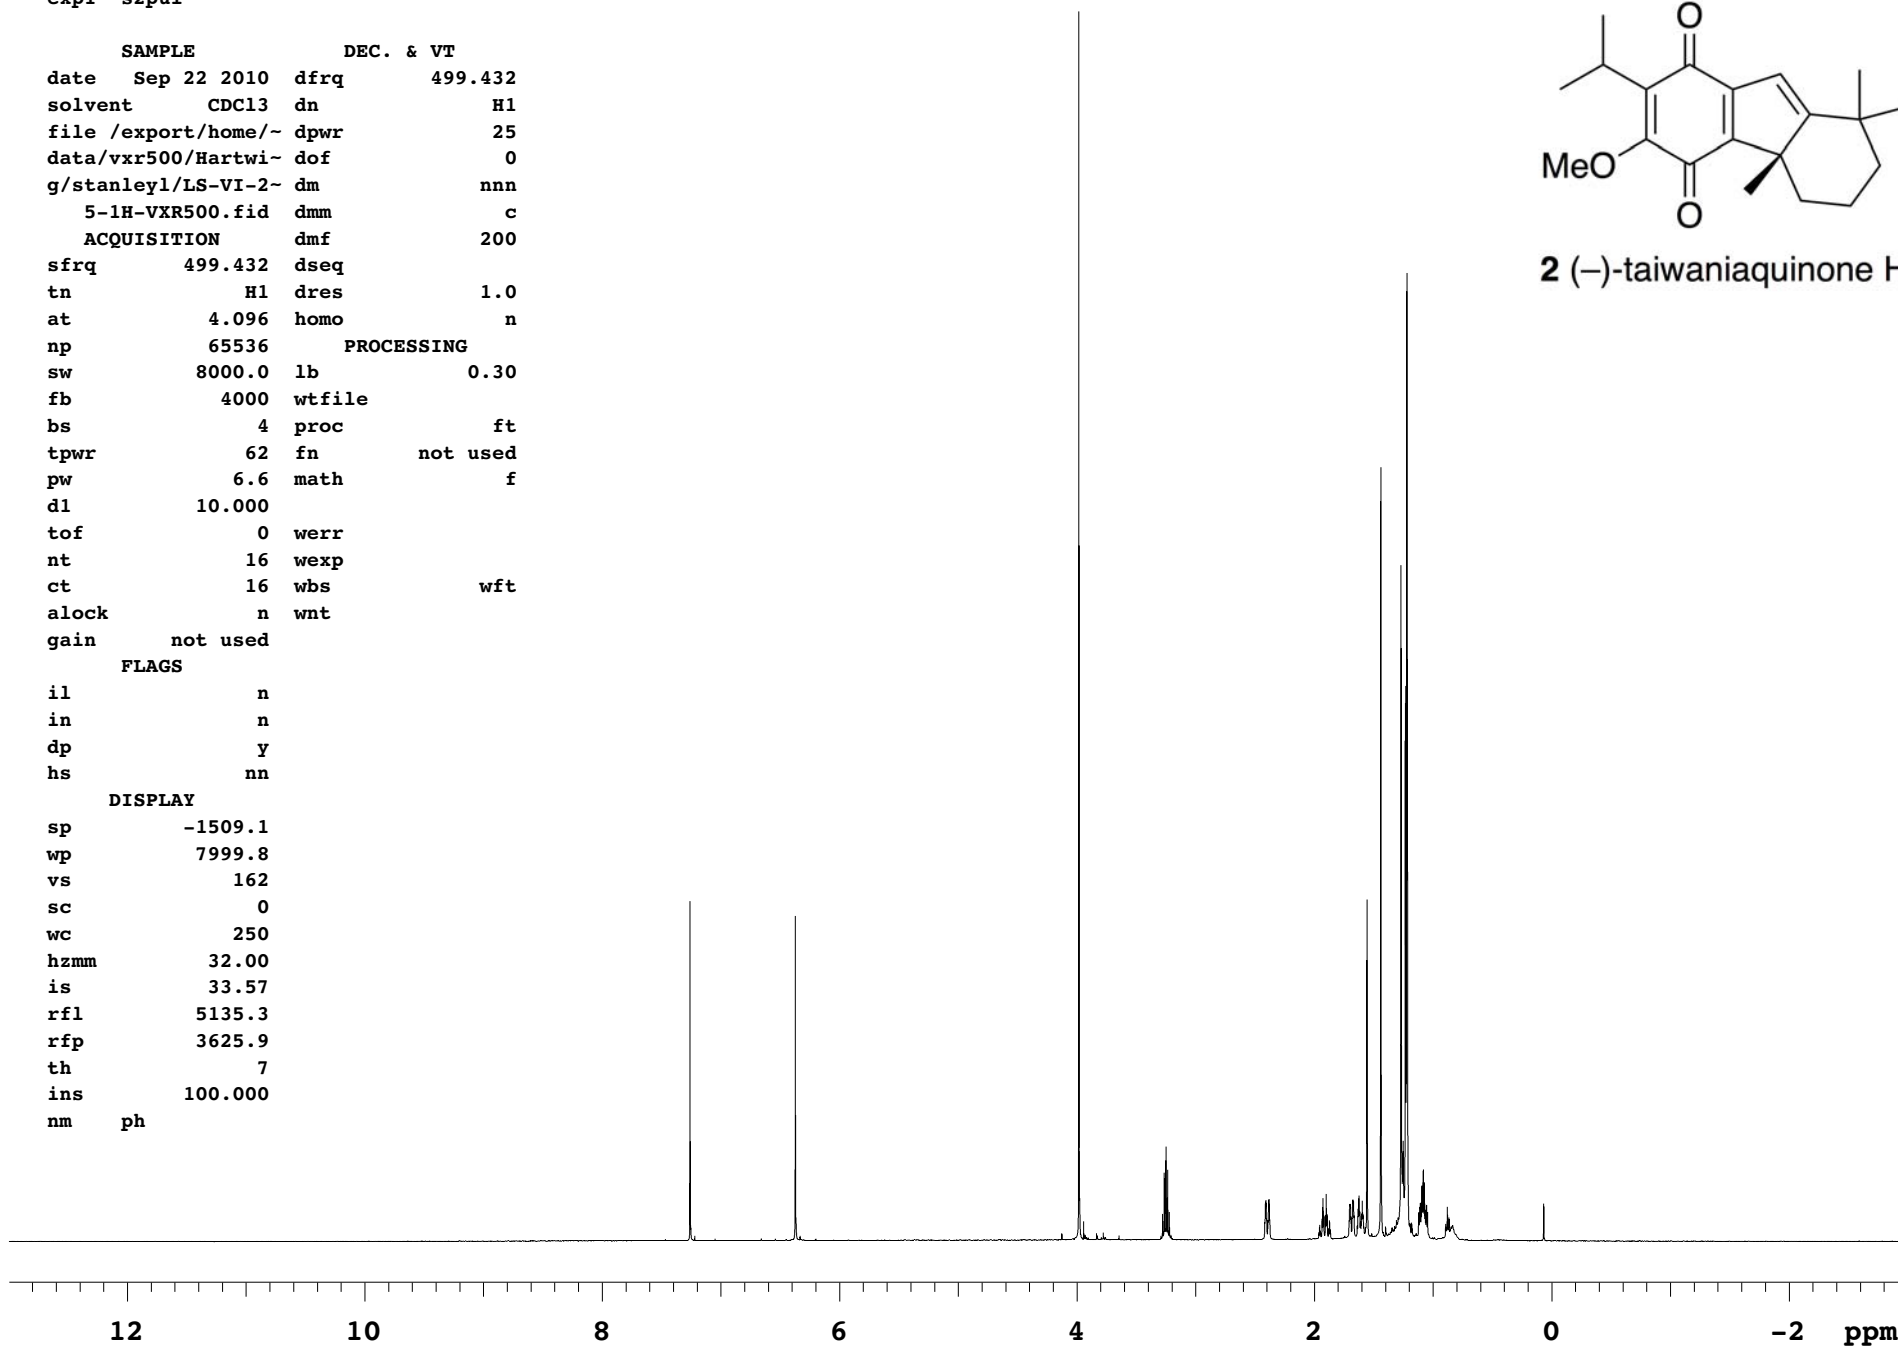

LS-VI-25-13C-U500

exp2 s2pul

| SAMPLE              |                | DEC. & VT |          |
|---------------------|----------------|-----------|----------|
| date                | Sep 24 2010    | dfrq      | 499.692  |
| solvent             | CDC13          | dn        | H1       |
| file                | /export/home/~ | dpwr      | 44       |
| data/Hartwig/stanl~ |                | dof       | -827.6   |
| eyl/LS-VI-25-13C-U~ |                | dm        | YYY      |
| 500.fid             |                | dmm       | w        |
| ACQUISITION         |                | dmf       | 19608    |
| sfrq                | 125.661        | dseq      |          |
| tn                  | C13            | dres      | 90.0     |
| at                  | 6.000          | homo      | n        |
| np                  | 361990         | DEC2      |          |
| sw                  | 30165.9        | dfrq2     | 0        |
| fb                  | 17000          | dn2       |          |
| bs                  | 16             | dpwr2     | 1        |
| ss                  | 1              | dof2      | 0        |
| tpwr                | 54             | dm2       | n        |
| pw                  | 6.0            | dmm2      | c        |
| d1                  | 1.000          | dmf2      | 10000    |
| tof                 | 1884.7         | dseq2     |          |
| nt                  | 3000           | dres2     | 1.0      |
| ct                  | 1405           | homo2     | n        |
| alock               |                | n         |          |
| gain                |                | not used  | lb       |
| FLAGS               |                | wtfile    | 1.00     |
| il                  | n              | proc      | ft       |
| in                  | n              | fn        | not used |
| dp                  | y              | math      | f        |
| hs                  | nn             |           |          |
| DISPLAY             |                | werr      |          |
| sp                  | -1262.0        | wexp      |          |
| wp                  | 30165.8        | wbs       | wft      |
| vs                  | 400            | wnt       |          |
| sc                  | 0              |           |          |
| wc                  | 250            |           |          |
| hzmm                | 120.66         |           |          |
| is                  | 500.00         |           |          |
| rfl                 | 10965.8        |           |          |
| rfp                 | 9703.7         |           |          |
| th                  | 6              |           |          |
| ins                 | 100.000        |           |          |
| nm                  | ph             |           |          |

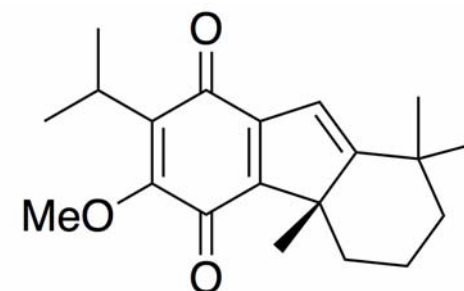

2 (-)-taiwaniaquinone H

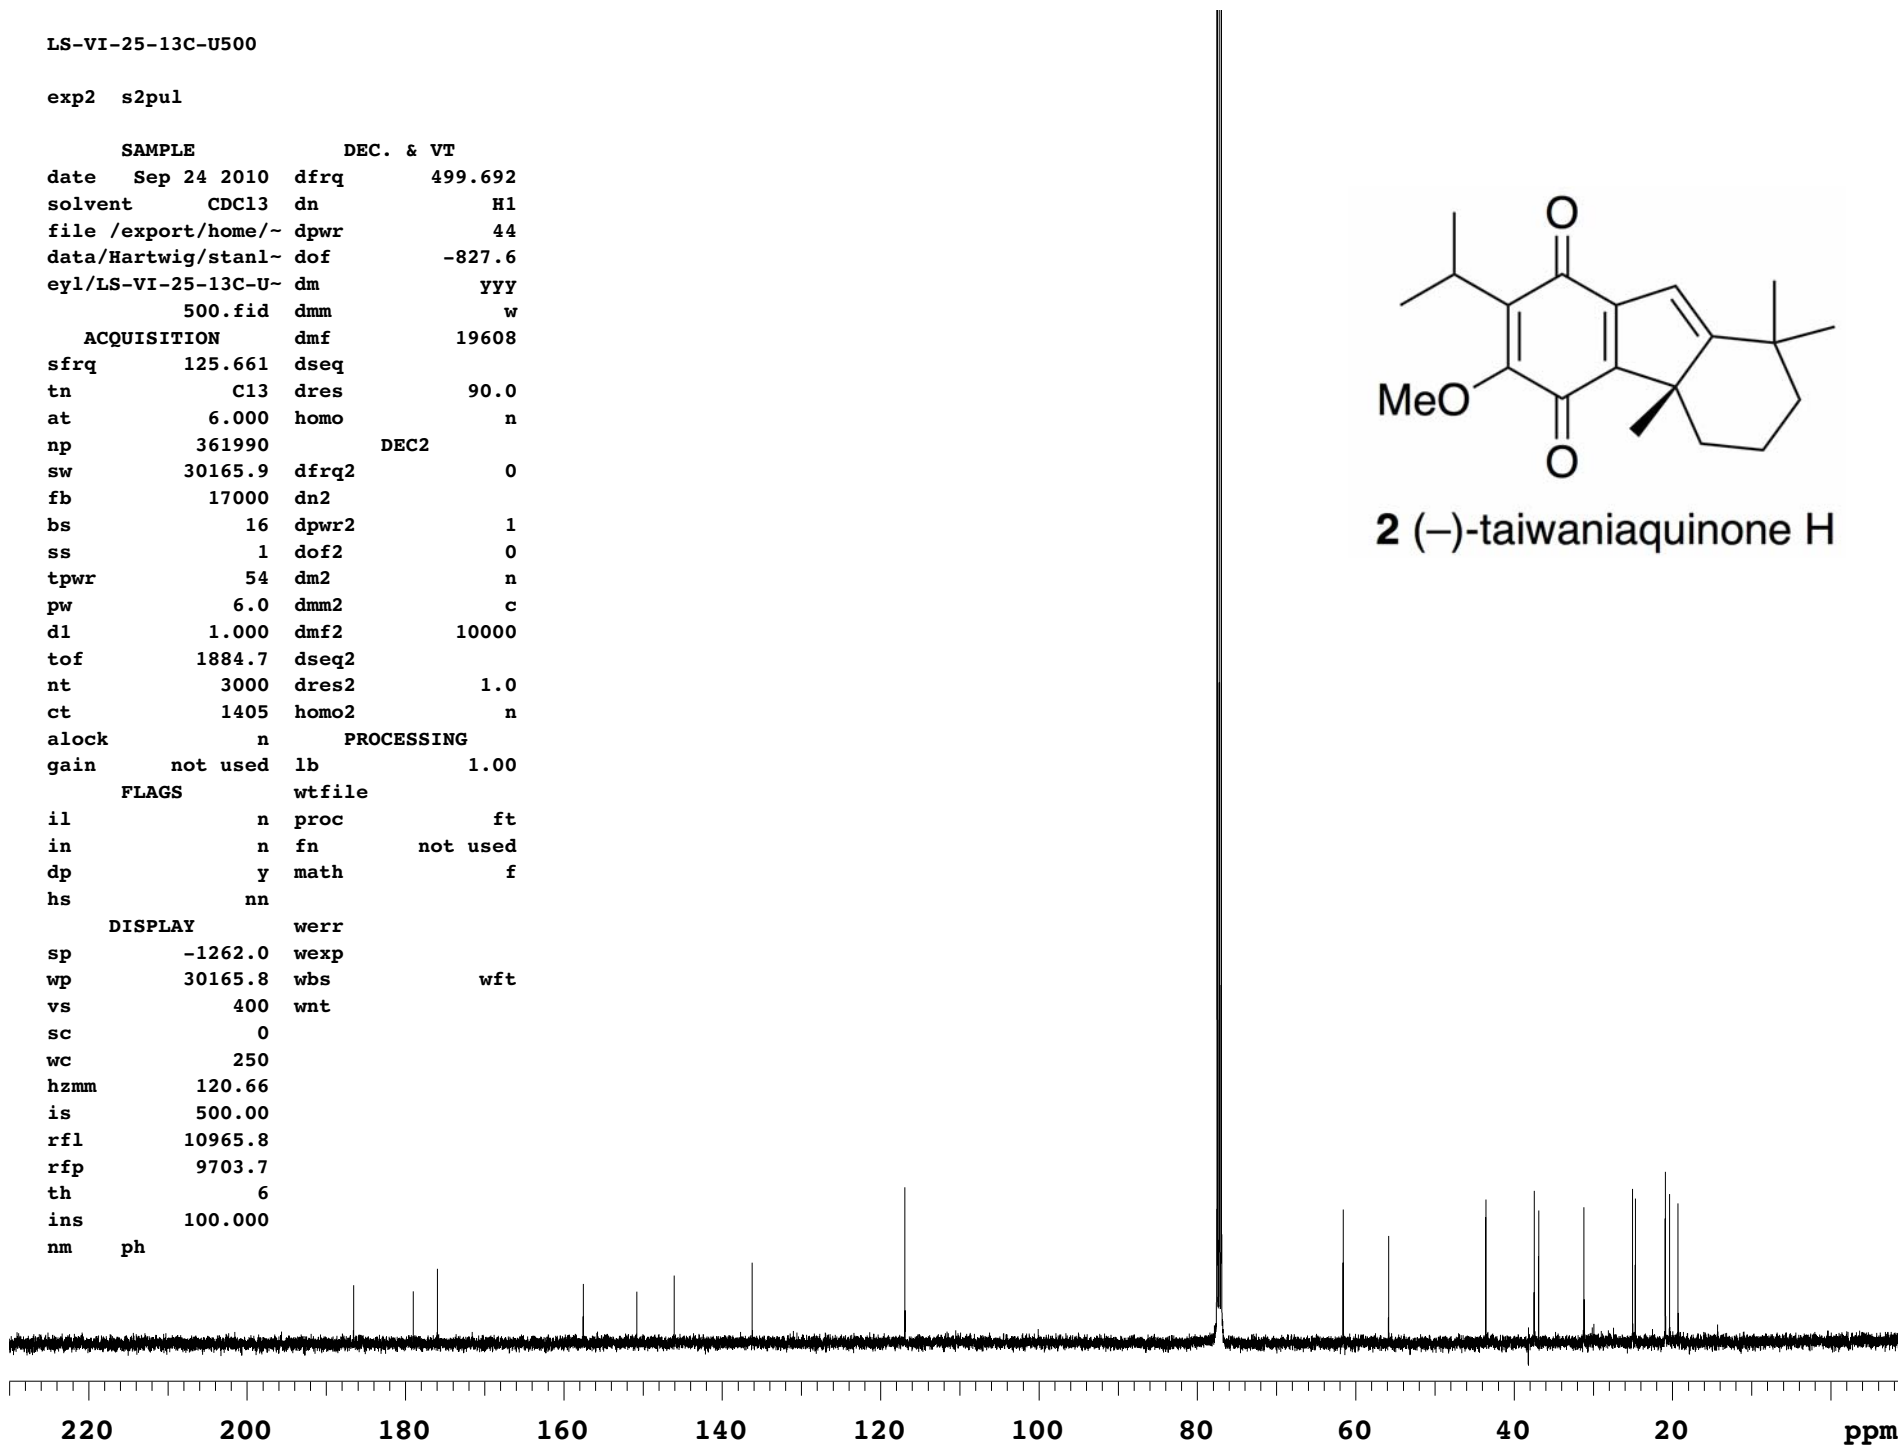

LS-VI-33-1H-U500

expl s2pul

| SAMPLE              |                | DEC. & VT  |          |
|---------------------|----------------|------------|----------|
| date                | Oct 25 2010    | dfrq       | 499.693  |
| solvent             | CDC13          | dn         | H1       |
| file                | /export/home/~ | dpwr       | 20       |
| data/u500/Hartwig/~ |                | dof        | 0        |
| stanley1/LS-VI-33-~ |                | dm         | nnn      |
| 1H-U500.fid         |                | dmm        | c        |
| ACQUISITION         |                | dmf        | 200      |
| sfrq                | 499.693        | dseq       |          |
| tn                  | H1             | dres       | 1.0      |
| at                  | 10.000         | homo       | n        |
| np                  | 140498         | PROCESSING |          |
| sw                  | 7024.9         | lb         | 0.30     |
| fb                  | 4000           | wtfile     |          |
| bs                  | 4              | proc       | ft       |
| tpwr                | 63             | fn         | not used |
| pw                  | 6.5            | math       | f        |
| d1                  | 0              |            |          |
| tof                 | 2.0            | werr       |          |
| nt                  | 16             | wexp       |          |
| ct                  | 16             | wbs        | wft      |
| alock               | n              | wnt        |          |
| gain                | not used       |            |          |
| FLAGS               |                |            |          |
| il                  | n              |            |          |
| in                  | n              |            |          |
| dp                  | y              |            |          |
| hs                  | nn             |            |          |
| DISPLAY             |                |            |          |
| sp                  | -1012.3        |            |          |
| wp                  | 7024.9         |            |          |
| vs                  | 95             |            |          |
| sc                  | 0              |            |          |
| wc                  | 250            |            |          |
| hzmm                | 28.10          |            |          |
| is                  | 33.57          |            |          |
| rfl                 | 4640.1         |            |          |
| rfp                 | 3627.8         |            |          |
| th                  | 7              |            |          |
| ins                 | 100.000        |            |          |
| ai                  | ph             |            |          |

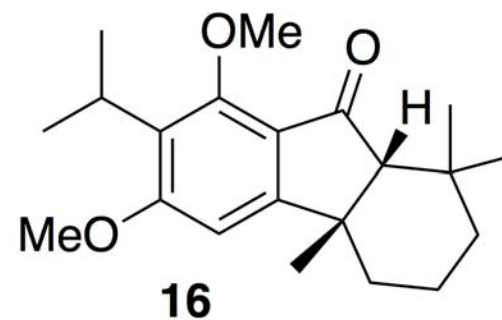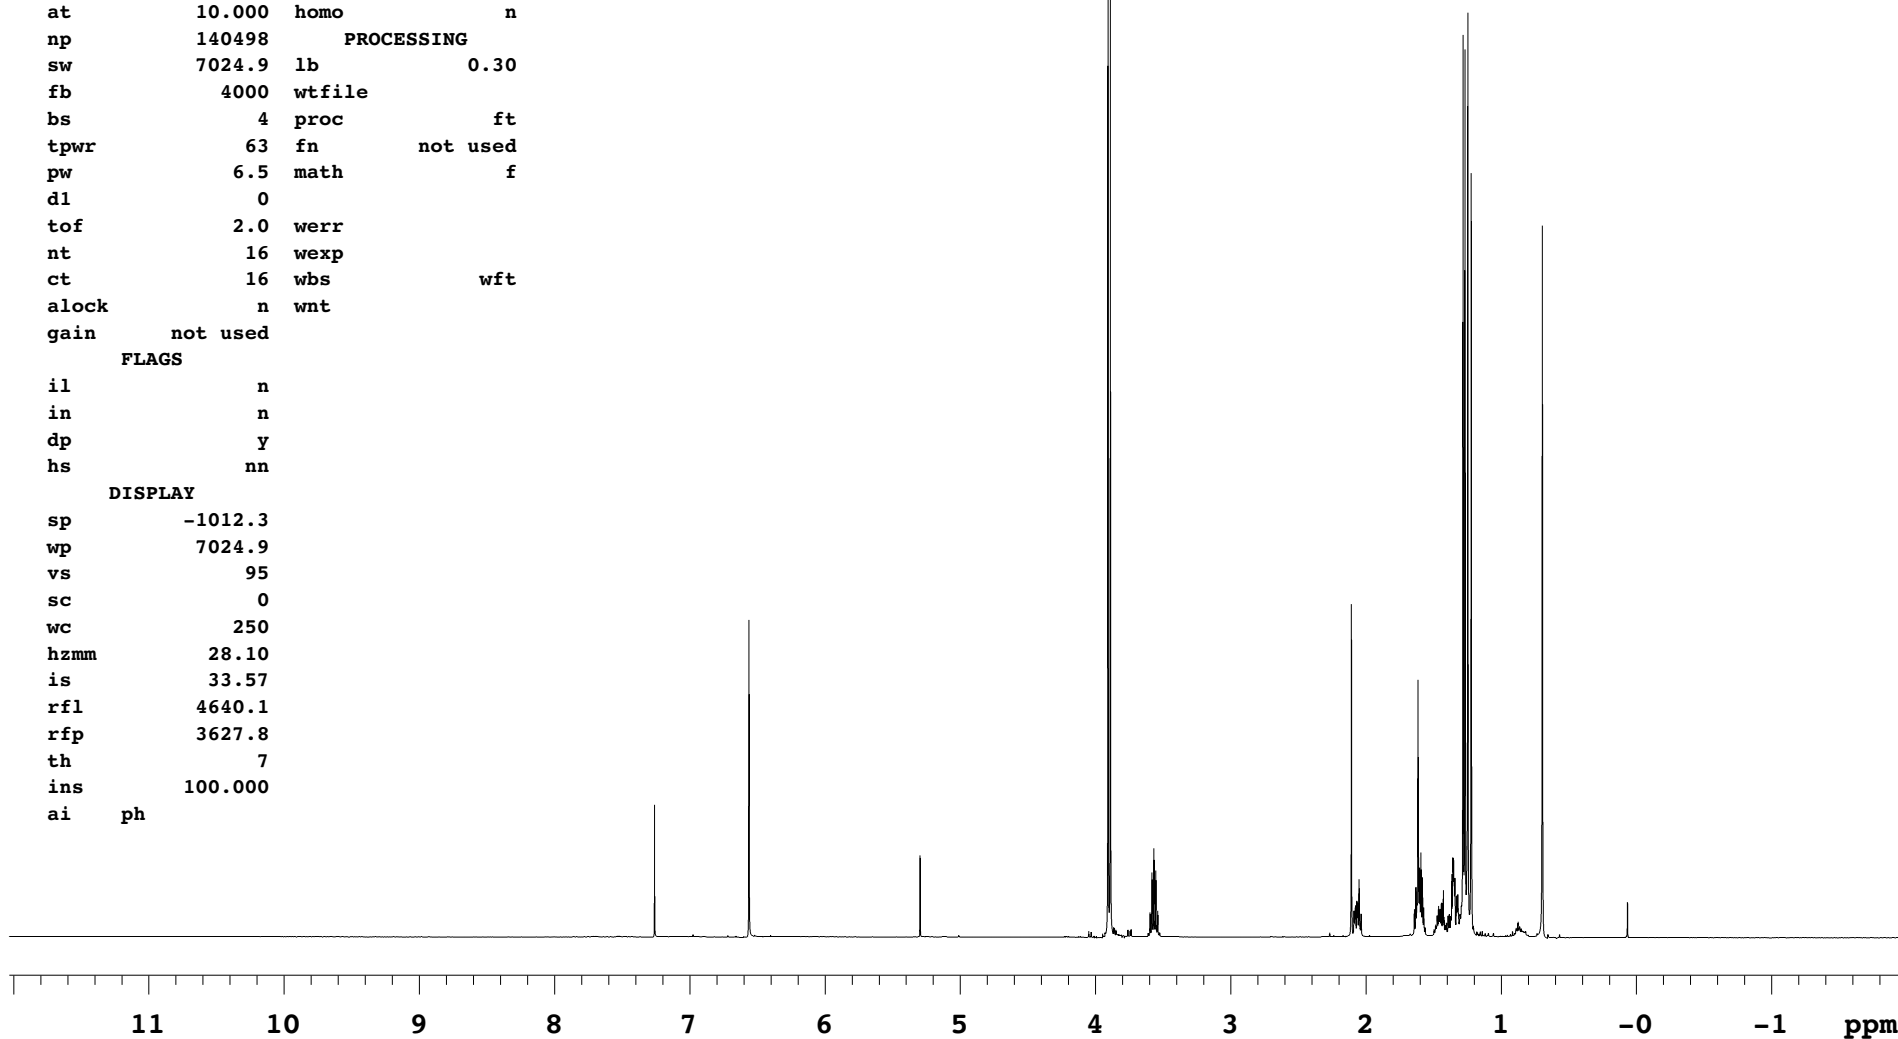

LS-VI-33-13C-U500

exp1 s2pul

| SAMPLE              |                | DEC. & VT  |          |
|---------------------|----------------|------------|----------|
| date                | Oct 26 2010    | dfrq       | 499.692  |
| solvent             | CDC13          | dn         | H1       |
| file                | /export/home/~ | dpwr       | 44       |
| data/u500/Hartwig/~ |                | dof        | -827.6   |
| stanley1/LS-VI-33-~ |                | dm         | YYY      |
| 13C-U500.fid        |                | dmm        | w        |
| ACQUISITION         |                | dmf        | 19608    |
| sfrq                | 125.661        | dseq       |          |
| tn                  | C13            | dres       | 90.0     |
| at                  | 5.000          | homo       | n        |
| np                  | 301660         | PROCESSING |          |
| sw                  | 30165.9        | lb         | 1.00     |
| fb                  | 17000          | wtfile     |          |
| bs                  | 16             | proc       | ft       |
| ss                  | 1              | fn         | not used |
| tpwr                | 54             | math       | f        |
| pw                  | 6.0            |            |          |
| d1                  | 1.000          | werr       |          |
| tof                 | 1884.7         | wexp       |          |
| nt                  | 2000           | wbs        | wft      |
| ct                  | 389            | wnt        |          |
| alock               | n              |            |          |
| gain                | not used       |            |          |
| FLAGS               |                |            |          |
| il                  | n              |            |          |
| in                  | n              |            |          |
| dp                  | y              |            |          |
| hs                  | nn             |            |          |
| DISPLAY             |                |            |          |
| sp                  | -1262.3        |            |          |
| wp                  | 30165.8        |            |          |
| vs                  | 162            |            |          |
| sc                  | 0              |            |          |
| wc                  | 250            |            |          |
| hzmm                | 120.66         |            |          |
| is                  | 500.00         |            |          |
| rfl                 | 10966.2        |            |          |
| rfp                 | 9703.7         |            |          |
| th                  | 4              |            |          |
| ins                 | 100.000        |            |          |
| nm                  | ph             |            |          |

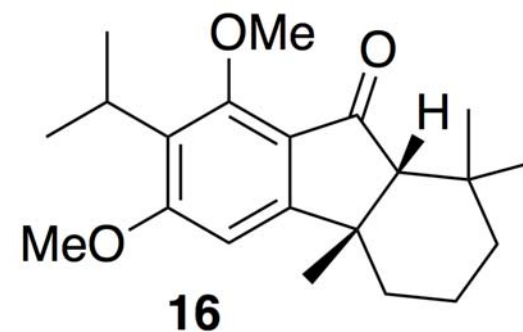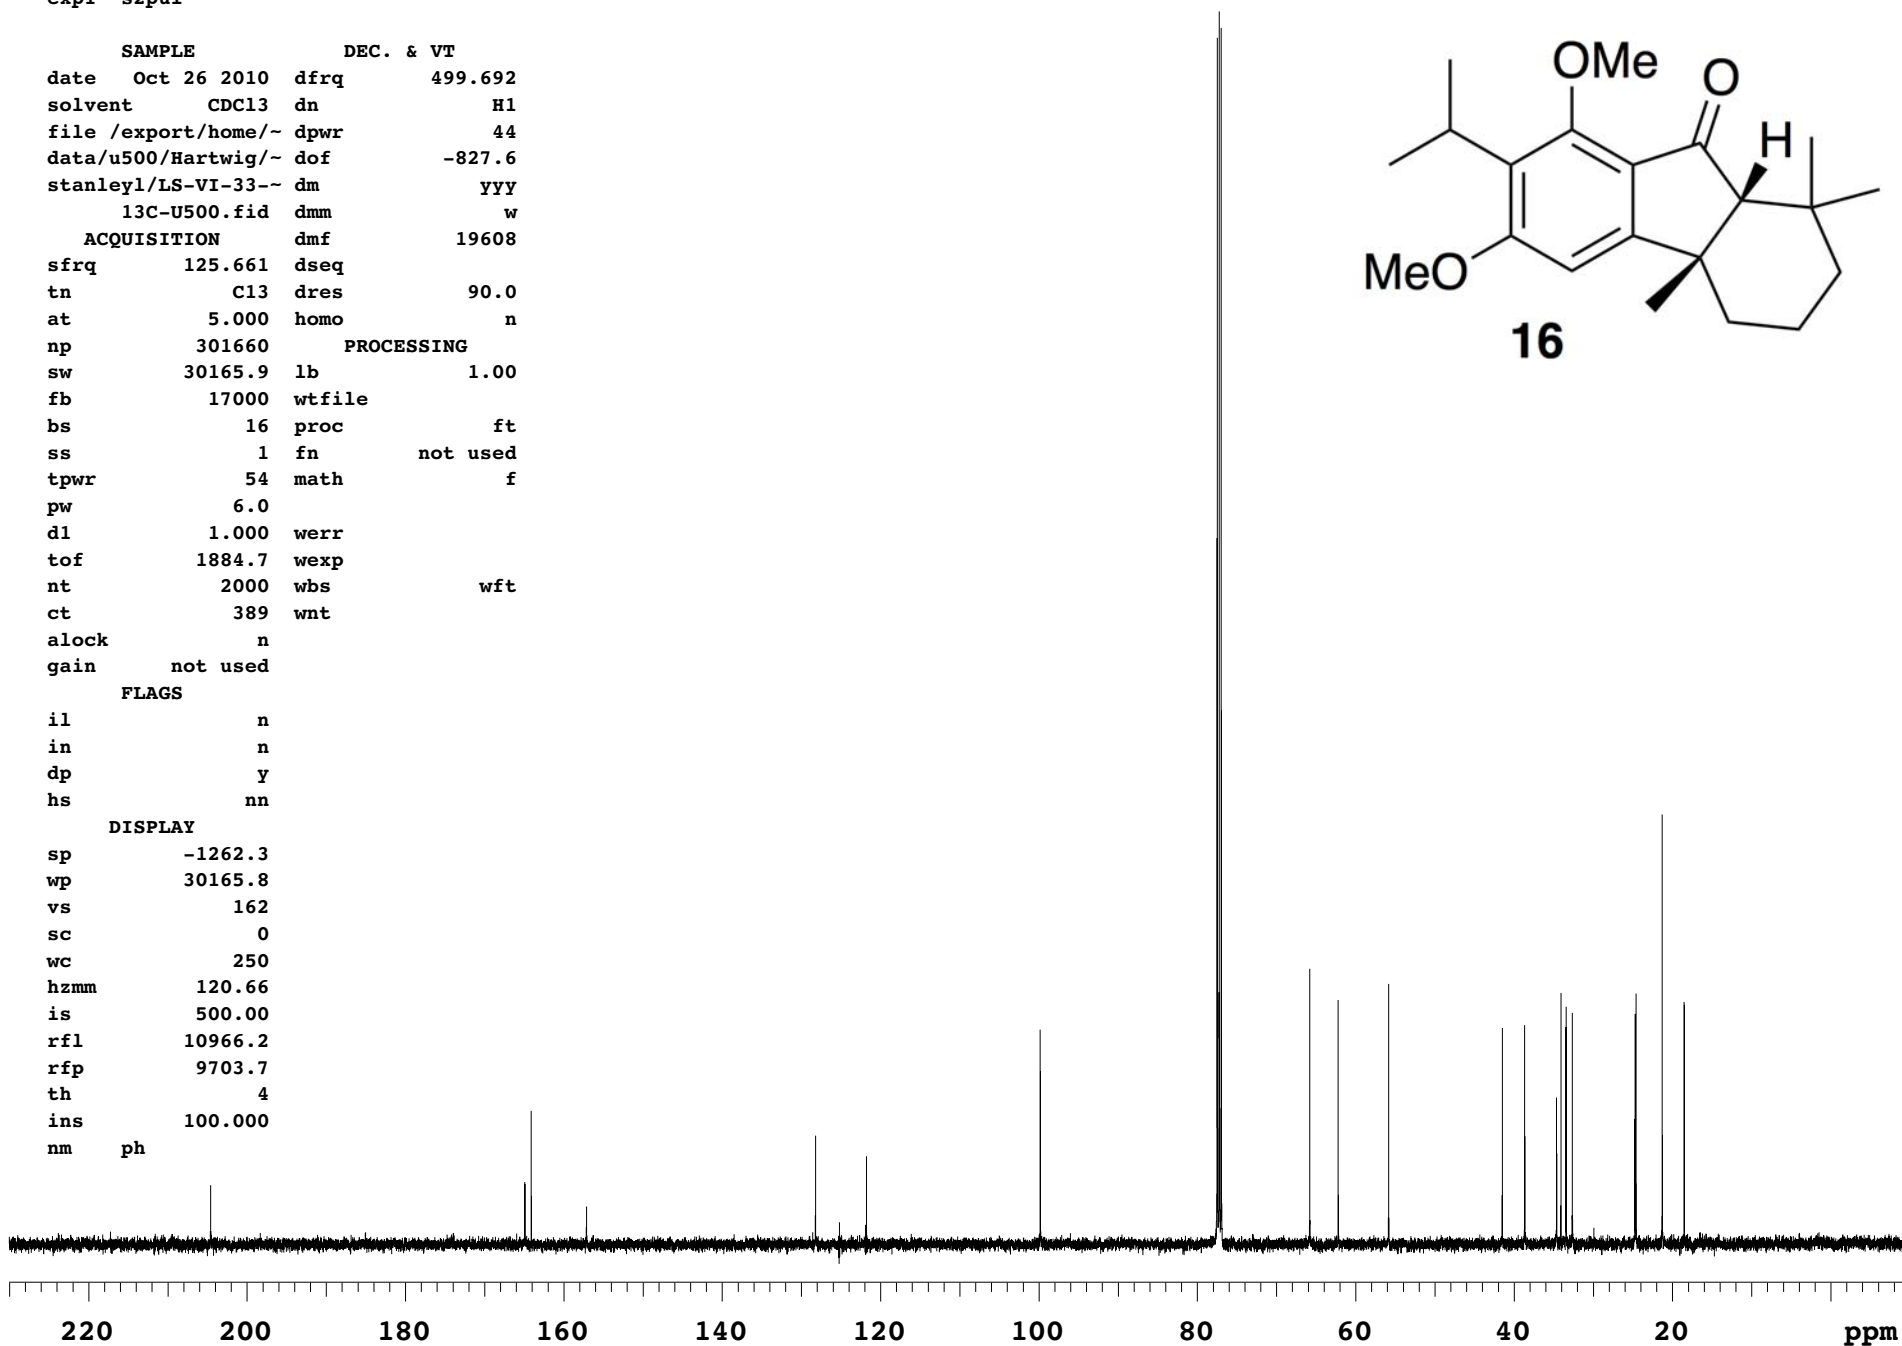

LS-VI-35-1H-U500

expl s2pul

| SAMPLE              |                | DEC. & VT  |          |
|---------------------|----------------|------------|----------|
| date                | Oct 28 2010    | dfrq       | 499.693  |
| solvent             | CDC13          | dn         | H1       |
| file                | /export/home/~ | dpwr       | 20       |
| data/u500/Hartwig/~ |                | dof        | 0        |
| stanley1/LS-VI-35-~ |                | dm         | nnn      |
| 1H-U500.fid         |                | dmm        | c        |
| ACQUISITION         |                | dmf        | 200      |
| sfrq                | 499.693        | dseq       |          |
| tn                  | H1             | dres       | 1.0      |
| at                  | 10.000         | homo       | n        |
| np                  | 140498         | PROCESSING |          |
| sw                  | 7024.9         | lb         | 0.30     |
| fb                  | 4000           | wtfile     |          |
| bs                  | 4              | proc       | ft       |
| tpwr                | 63             | fn         | not used |
| pw                  | 6.5            | math       | f        |
| d1                  | 0              |            |          |
| tof                 | 2.0            | werr       |          |
| nt                  | 16             | wexp       |          |
| ct                  | 16             | wbs        | wft      |
| alock               | n              | wnt        |          |
| gain                | not used       |            |          |
| FLAGS               |                |            |          |
| il                  | n              |            |          |
| in                  | n              |            |          |
| dp                  | y              |            |          |
| hs                  | nn             |            |          |
| DISPLAY             |                |            |          |
| sp                  | -1012.2        |            |          |
| wp                  | 7024.9         |            |          |
| vs                  | 70             |            |          |
| sc                  | 0              |            |          |
| wc                  | 250            |            |          |
| hzmm                | 28.10          |            |          |
| is                  | 33.57          |            |          |
| rfl                 | 4640.0         |            |          |
| rfp                 | 3627.8         |            |          |
| th                  | 7              |            |          |
| ins                 | 100.000        |            |          |
| ai                  | ph             |            |          |

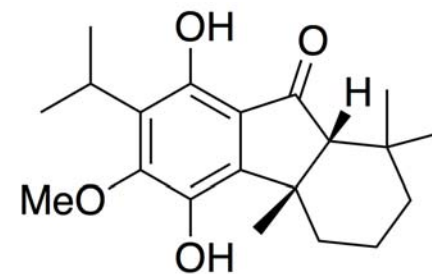

7 (-)-taiwaniaquinol B

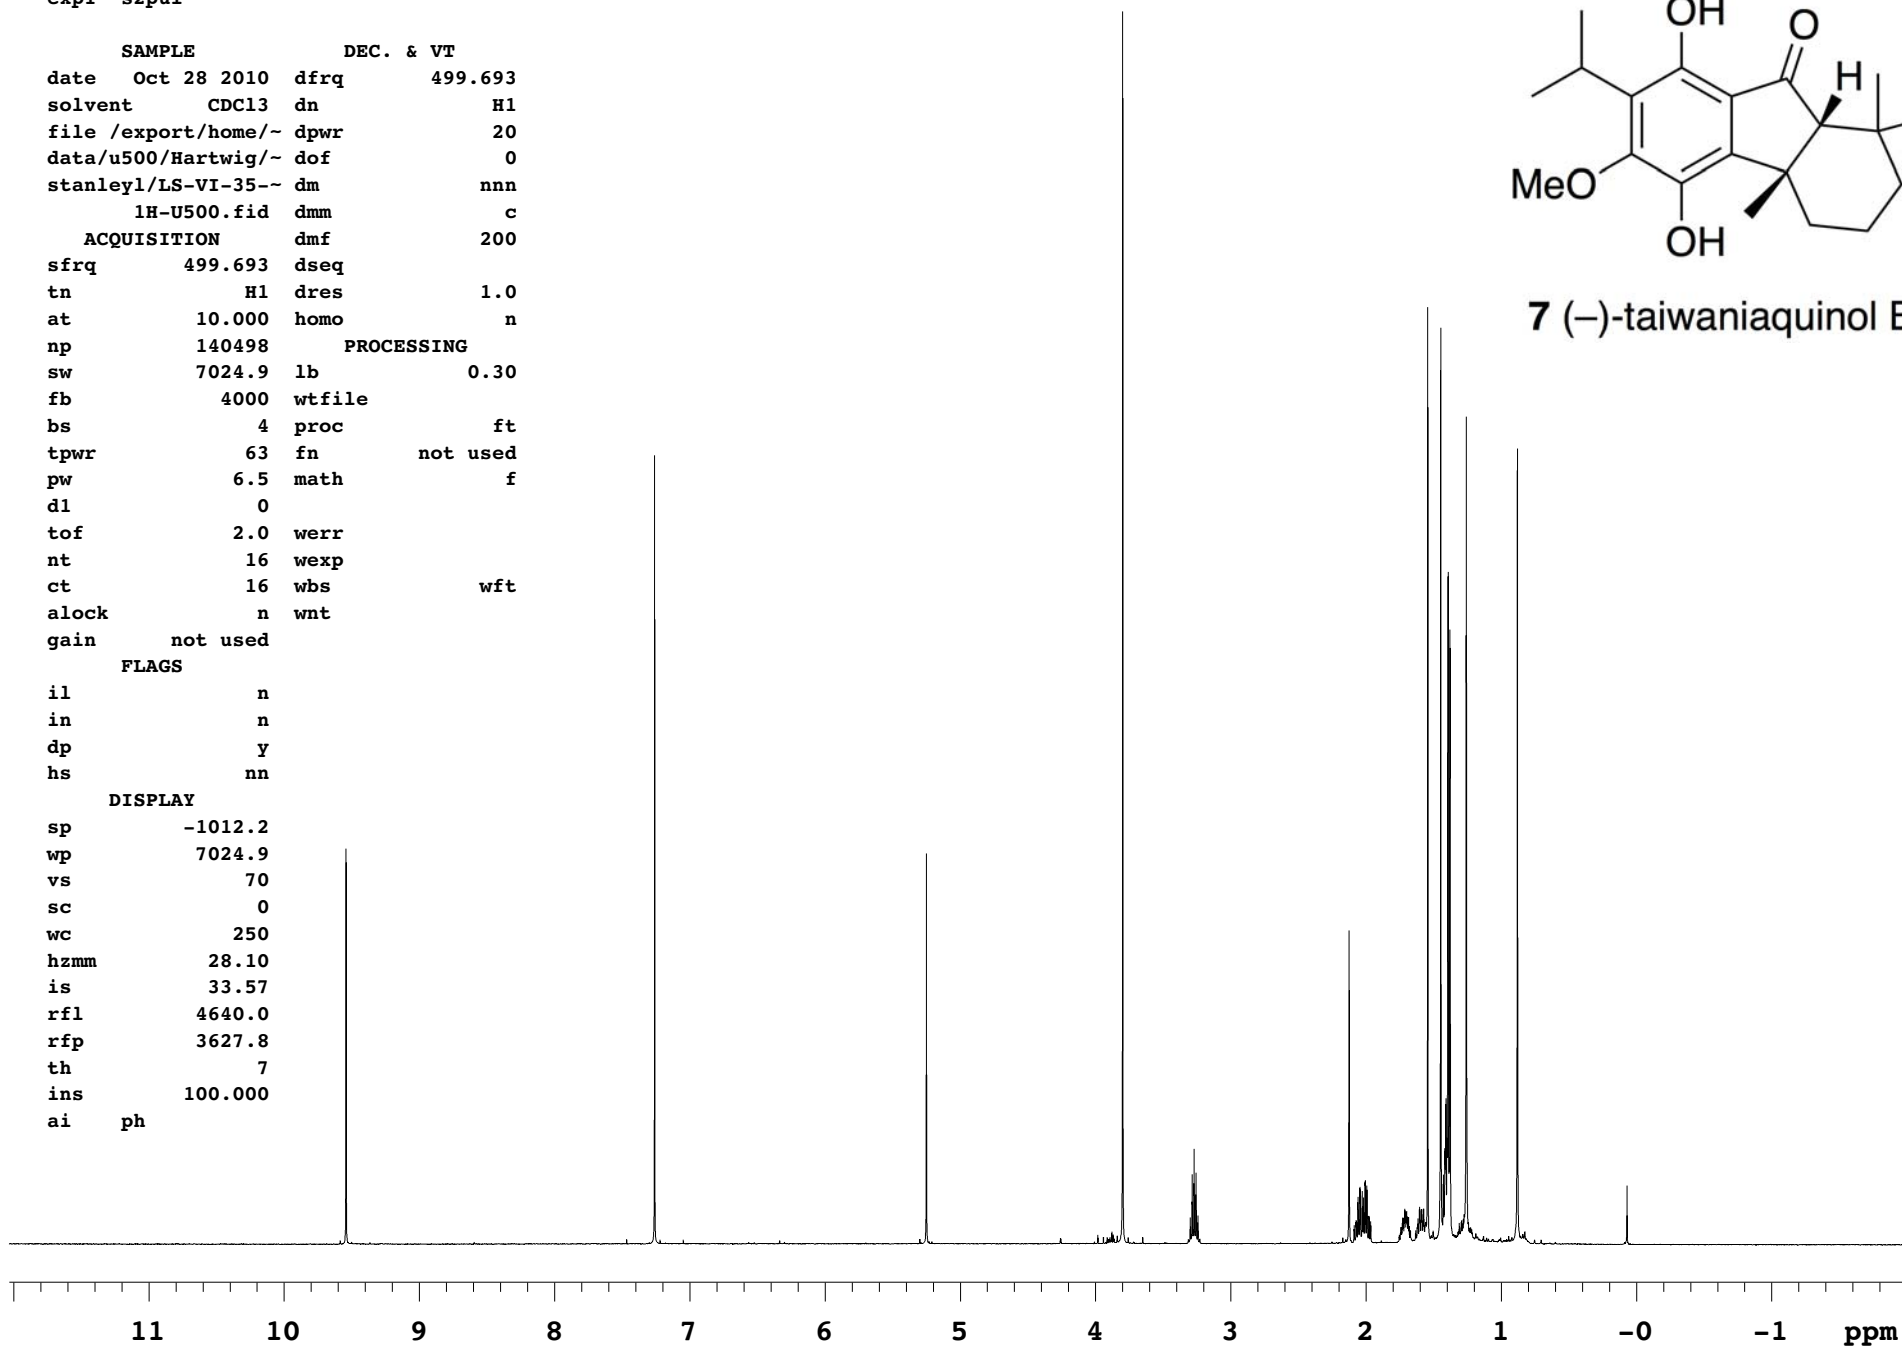

LS-VI-35-13C-U500

exp1 s2pul

| SAMPLE              |                | DEC. & VT  |          |
|---------------------|----------------|------------|----------|
| date                | Oct 28 2010    | dfrq       | 499.692  |
| solvent             | CDC13          | dn         | H1       |
| file                | /export/home/~ | dpwr       | 44       |
| data/u500/Hartwig/~ |                | dof        | -827.6   |
| stanley1/LS-VI-35-~ |                | dm         | YYY      |
| 13C-U500.fid        |                | dmm        | w        |
| ACQUISITION         |                | dmf        | 19608    |
| sfrq                | 125.661        | dseq       |          |
| tn                  | C13            | dres       | 90.0     |
| at                  | 7.000          | homo       | n        |
| np                  | 422322         | PROCESSING |          |
| sw                  | 30165.9        | lb         | 1.00     |
| fb                  | 17000          | wtfile     |          |
| bs                  | 16             | proc       | ft       |
| ss                  | 1              | fn         | not used |
| tpwr                | 54             | math       | f        |
| pw                  | 6.0            |            |          |
| d1                  | 1.000          | werr       |          |
| tof                 | 1884.7         | wexp       |          |
| nt                  | 2000           | wbs        | wft      |
| ct                  | 1332           | wnt        |          |
| alock               | n              |            |          |
| gain                | not used       |            |          |
| FLAGS               |                |            |          |
| il                  | n              |            |          |
| in                  | n              |            |          |
| dp                  | y              |            |          |
| hs                  | nn             |            |          |
| DISPLAY             |                |            |          |
| sp                  | -1250.8        |            |          |
| wp                  | 30165.8        |            |          |
| vs                  | 1500           |            |          |
| sc                  | 0              |            |          |
| wc                  | 250            |            |          |
| hzmm                | 120.66         |            |          |
| is                  | 500.00         |            |          |
| rfl                 | 10954.7        |            |          |
| rfp                 | 9703.7         |            |          |
| th                  | 6              |            |          |
| ins                 | 100.000        |            |          |
| nm                  | ph             |            |          |

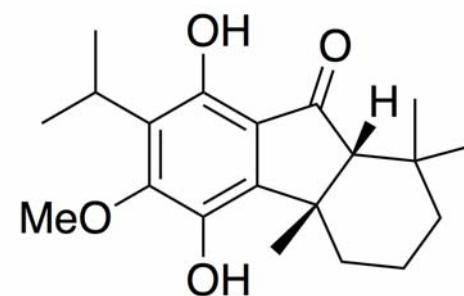

7 (-)-taiwaniaquinol B

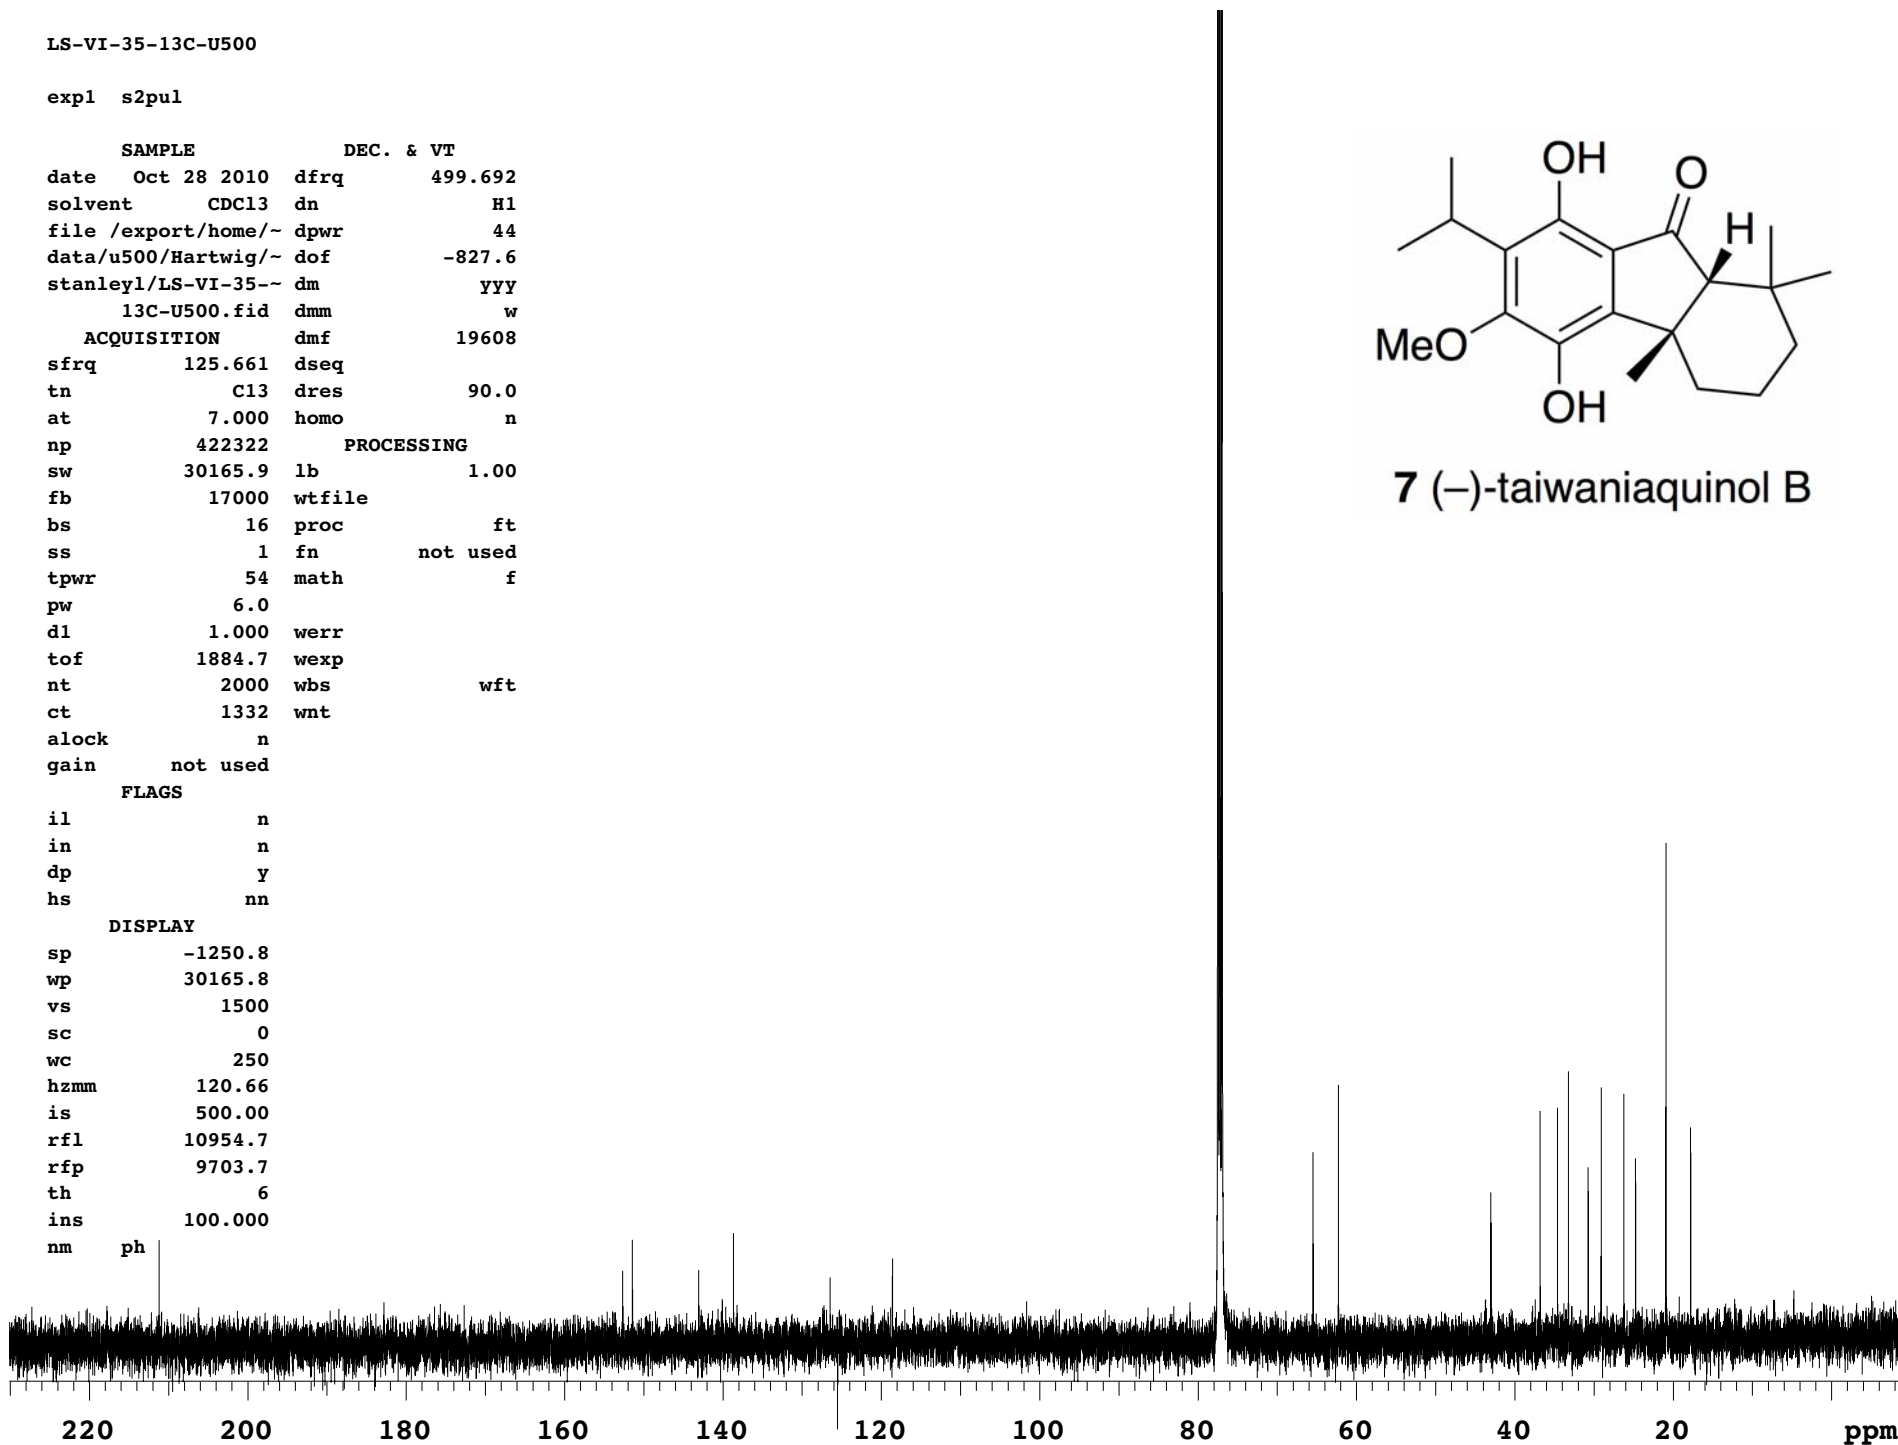

Supplement: Supplementary file 1 [file 4363657]
